# Supplementary material for: Synthesis of the aglycon of aspafiliosides E and F based on cascade reactions
Source: Royal Society of Chemistry journal article supplement (doi:10.1039/c5cc08856a), 2015-12-18

## SUPPORTING INFORMATION

### Synthesis of the Aglycon of Aspafliosides E and F Based on Cascade Reactions

Jing-Jing Wu, Yong Shi,\* and Wei-Sheng Tian\*

*The Key Laboratory of Synthetic Chemistry of Natural Substances, Shanghai Institute of Organic Chemistry, Chinese Academy of Sciences, 345 Lingling Road, Shanghai 200032, China*

*Email: shiong81@sioc.ac.cn; wstian@sioc.ac.cn*

## Experimental Procedures and Characterization Data

**General Methods:** All reactions sensitive to air or moisture were performed in flame-dried round bottom flasks with rubber septum under a positive pressure of argon or nitrogen atmosphere, unless otherwise noted. Air and moisture-sensitive liquids and solutions were transferred via syringe and stainless steel cannula. Tetrahydrofuran (THF) and diethyl ether (Et<sub>2</sub>O) were distilled from sodium/benzophenone, methylene chloride (DCM), toluene, and 2,6-lutidine from calcium hydride, *N,N*-dimethylformamide (DMF) and dimethylsulfoxide from calcium hydride under reduced pressure, acetone from K<sub>2</sub>CO<sub>3</sub> onto activated 3 Å molecular sieves, others according to the standard procedures described in *Purification of Laboratory Chemicals* (2009). Yields refer to chromatographically and spectroscopically (<sup>1</sup>H NMR) homogeneous materials, unless otherwise stated. Reactions were monitored by thin-layer chromatography (TLC) carried out on silica gel plates using UV light as visualizing agent and an ethanolic solution of phosphomolybic acid, and heat as developing agents. NMR spectra were recorded on Bruker DRX-400 instrument and calibrated using residual undeuterated solvent as an internal reference [<sup>1</sup>H NMR: CHCl<sub>3</sub> (7.26), C<sub>6</sub>HD<sub>5</sub> (7.16), DMSO-*d*<sub>6</sub> (2.50); <sup>13</sup>C NMR: CDCl<sub>3</sub> (77.16), C<sub>6</sub>D<sub>6</sub> (128.06)]. The following abbreviations were used to explain the multiplicities: s = singlet, d = doublet, t = triplet, q = quartet, br = broad.

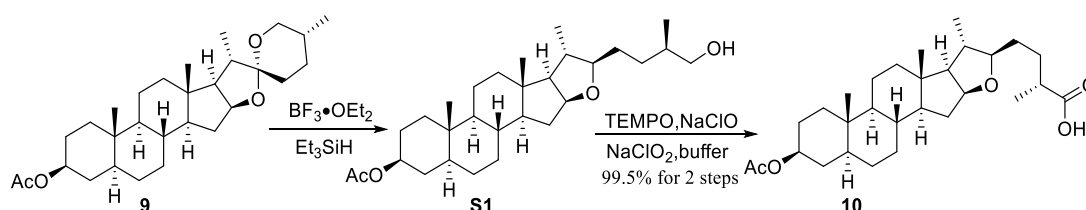

Under a positive pressure of nitrogen, to a solution of tigogenin acetate **9** (2.75 g, 6 mmol) and Et<sub>3</sub>SiH (1.9 mL, 12 mmol) in dried CH<sub>2</sub>Cl<sub>2</sub> (40 mL) was added boron trifluoride diethyl etherate (1.25 mL, 12 mmol) dropwise at 0 °C. The resulting mixture was warmed to room temperature, stirred for 12 h, quenched with saturated aqueous NaHCO<sub>3</sub>, diluted with water, and extracted with CH<sub>2</sub>Cl<sub>2</sub> (50 + 30 mL). The combined organic layers were washed with brine, dried over sodium sulfate, filtered, and concentrated under reduced pressure. The crude **S1** was used in next step without purification.

To a mixture of crude **S1**, TEMPO (46 mg, 0.30 mmol), MeCN (30 mL), and sodium phosphate buffer (25 mL) were added an aqueous solution of NaClO<sub>2</sub> (1.02 g, 12 mmol, in 5 mL water) and dilute bleach (0.5 mL in 5 mL water) separately.<sup>1</sup> The orange solution was stirred at ambient temperature for 3 h, quenched with cold Na<sub>2</sub>SO<sub>3</sub> solution, and extracted with CHCl<sub>3</sub> (60 + 30 mL). The combined organic layers were washed with brine, dried over Na<sub>2</sub>SO<sub>4</sub>, filtered, and concentrated to afford **10** (2.88 g, 99.5% from **9**) as white solid. The crude **10** does not need purification for further use.

**S1** (Known compound)<sup>2</sup>: <sup>1</sup>H NMR (400 MHz, CDCl<sub>3</sub>) δ 4.73 – 4.62 (m, 1H), 4.28 (dd, *J* = 13.0, 7.4 Hz, 1H), 3.47 (dd, *J* = 10.4, 6.2 Hz, 1H), 3.40 (dd, *J* = 10.5, 6.2 Hz, 1H), 3.32 (td, *J* = 7.8, 4.2 Hz, 1H), 2.99 (s, 1H), 2.01 (s, 3H), 0.99 (d, *J* = 6.6 Hz, 3H), 0.91 (d, *J* = 6.7 Hz, 3H), 0.84 (s, 3H), 0.79 (s, 3H), 0.66 (td, *J* = 15.6, 6.6 Hz, 1H).

**10** (Known compound): <sup>1</sup>H NMR (400 MHz, CDCl<sub>3</sub>) δ 4.75 – 4.60 (m, 1H), 4.31 (dd, *J* = 13.1, 7.4 Hz, 1H), 3.34 (t, *J* = 7.7 Hz, 1H), 2.52 (s, 1H), 2.01 (s, 3H), 1.17 (d, *J* = 6.8 Hz, 3H), 0.98 (d, *J* = 6.7 Hz, 3H), 0.83 (s, 3H), 0.76 (s, 3H).

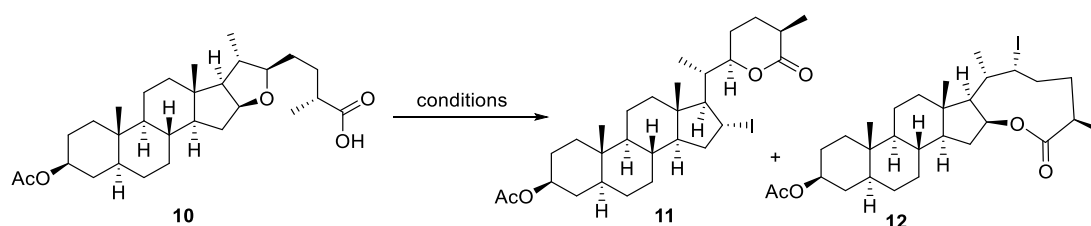

| Entries | Conditions                                                                                    | Yields                                            |
|---------|-----------------------------------------------------------------------------------------------|---------------------------------------------------|
| 1       | TFAA, TBAI (2 eq), CH <sub>2</sub> Cl <sub>2</sub> , 0 °C to rt, 23 h                         | <b>11</b> , 78%; <b>12</b> , 6.5%                 |
| 2       | TFAA, LiI (4 eq), TBAI (0.5 eq), CH <sub>2</sub> Cl <sub>2</sub> /MeCN (4/1), 0 °C to rt, 8 h | <b>11</b> , 89%; <b>12</b> , 3.8%                 |
| 3       | TFAA, LiI (3 eq), CH <sub>2</sub> Cl <sub>2</sub> /MeCN (4/1), 0 °C to rt, 2.5 h              | <b>11</b> , 88%; <b>12</b> , 7.8%                 |
| 4       | TFAA, NaI (3 eq), CH <sub>2</sub> Cl <sub>2</sub> /MeCN (4/1), 0 °C to rt, 6 h                | <b>11</b> , 87%; <b>12</b> , 11.6%                |
| 5       | TFAA, LiBr (3 eq), CH <sub>2</sub> Cl <sub>2</sub> /MeCN (4/1), 0 °C to rt, 6 h               | C16-Br- <b>11</b> , 86%; C22-Br- <b>12</b> , 8.7% |

Under a positive pressure of nitrogen, to a solution of **10** (238 mg 0.5 mmol) and sodium iodide (225 mg, 1.5 mmol) in CH<sub>2</sub>Cl<sub>2</sub>/MeCN (4 mL/1 mL) was added (CF<sub>3</sub>CO)<sub>2</sub>O

<sup>1</sup> Zhao, M.; Li, J.; Mano, E.; Song, Z.; Tschäen, D. M.; Grabowski, E. J. J.; Reider, P. J., Oxidation of Primary Alcohols to Carboxylic Acids with Sodium Chlorite Catalyzed by TEMPO and Bleach. *J. Org. Chem.* **1999**, *64* (7), 2564-2566.

<sup>2</sup> Seo, S.; Uomori, A.; Takeda, K. I., Direct observation of the reverse 1,5-hydride shift: the mechanism of acid-catalyzed isomerization at C-25 of spirostanols. *J. Org. Chem.* **1986**, *51* (20), 3823-3827.

(TFAA, 0.15 mL, 1.0 mmol) at 0 °C. The resulting mixture was vigorously stirred at ambient temperature for 2.5 h, quenched with saturated aqueous NaHCO<sub>3</sub> and saturated aqueous Na<sub>2</sub>SO<sub>3</sub>, diluted with water, and extracted with CH<sub>2</sub>Cl<sub>2</sub> (30 + 15 mL). The combined organic layers were washed with brine, dried over Na<sub>2</sub>SO<sub>4</sub>, filtered, concentrated under reduced pressure, and purified by silica gel column chromatography (PE/EA=7:1 to 6:1 to 3:1) to give **11** (253 mg, 87%) as white solid and **12** (34mg, 12%) as foam.

**11**: mp 165.5-166.4 °C; [ $\alpha$ ]<sub>D</sub><sup>24</sup> -2.13 (*c* 1.0, CHCl<sub>3</sub>); <sup>1</sup>H NMR (400 MHz, CDCl<sub>3</sub>)  $\delta$  4.76 – 4.64 (m, 2H), 4.08 (t, *J* = 7.6 Hz, 1H), 2.73 – 2.62 (m, 1H), 2.27 (dd, *J* = 14.4, 6.1 Hz, 1H), 2.02 (s, 3H), 1.23 (d, *J* = 6.7 Hz, 3H), 0.94 (d, *J* = 6.6 Hz, 3H), 0.81 (s, 3H), 0.69 (s, 3H); <sup>13</sup>C NMR (100 MHz, CDCl<sub>3</sub>)  $\delta$  176.7, 170.8, 79.7, 73.7, 65.0, 53.9, 53.1, 45.6, 44.6, 41.8, 39.9, 39.5, 36.8, 35.6, 34.3, 34.0, 33.2, 31.9, 28.9, 28.4, 27.5, 25.2, 21.6, 21.1, 20.8, 16.5, 13.9, 12.7, 12.3; IR 2968.6, 2929.6, 2868.4, 2849.5, 1742.1, 1731.1, 1449.2, 1363.0, 1042.6 cm<sup>-1</sup>; ESI-MS: 457.2 [M-I]<sup>+</sup>; HRMS (MADAI) (M-I+Na)<sup>+</sup> calculated for C<sub>29</sub>H<sub>44</sub>O<sub>4</sub> 479.3131, found 479.3145.

**12**: <sup>1</sup>H NMR (400 MHz, CDCl<sub>3</sub>)  $\delta$  5.31 (dd, *J* = 14.4, 8.2 Hz, 1H), 4.75 – 4.63 (m, 1H), 4.34 – 4.21 (m, 1H), 2.55 – 2.39 (m, 1H), 2.02 (s, 3H), 1.19 (d, *J* = 7.1 Hz, 3H), 1.08 (d, *J* = 6.5 Hz, 3H), 0.91 (s, 4H), 0.83 (s, 3H), 0.67 (td, *J* = 11.9, 3.7 Hz, 1H); <sup>13</sup>C NMR (100 MHz, CDCl<sub>3</sub>)  $\delta$  178.2, 170.8, 76.3, 73.7, 58.6, 54.0, 53.8, 44.6, 42.8, 42.2, 41.6, 39.6, 39.4, 36.8, 35.6, 34.9, 34.1, 34.1, 32.9, 32.0, 30.7, 28.5, 27.5, 24.1, 21.6, 20.9, 18.6, 13.5, 12.3; ESI-MS: 457.2, [M-I]<sup>+</sup>.

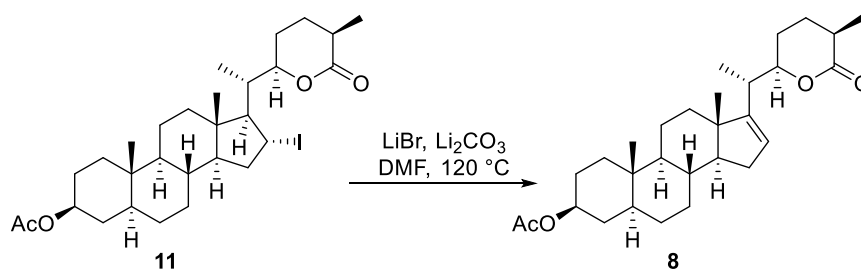

Under nitrogen, to a solution of **11** 3.5 g (6 mmol) in DMF (50 mL) were added lithium carbonate (1.45 g, 18 mmol) and lithium bromide (1.3 g, 12 mmol). The mixture was stirred at 120 °C for 8 h and concentrated under reduced pressure to remove the solvent. The residue was diluted with water and extracted with CH<sub>2</sub>Cl<sub>2</sub> (100 + 80 mL); the combined organic layers were washed with brine, dried over sodium sulfate, filtered, concentrated in vacuo, and purified through silica gel chromatography (PE/EA: 8/1) to give **8** (2.63 g, 96.3%) as white solid.

mp 144.3-145.5 °C;  $[\alpha]_D^{24}$  -13.85 (*c* 1.0, CHCl<sub>3</sub>); <sup>1</sup>H NMR (400 MHz, CDCl<sub>3</sub>) δ 5.47 (s, 1H), 4.74 – 4.63 (m, 1H), 4.42 – 4.31 (m, 1H), 2.66 – 2.53 (m, 1H), 2.52 – 2.41 (m, 1H), 2.02 (s, 3H), 1.21 (d, *J* = 6.7 Hz, 3H), 1.07 (d, *J* = 7.0 Hz, 3H), 0.85 (s, 3H), 0.78 (s, 3H); <sup>13</sup>C NMR (100 MHz, CDCl<sub>3</sub>) δ 176.5, 170.8, 155.9, 124.2, 80.6, 73.8, 57.4, 54.9, 47.3, 45.0, 36.7, 36.4, 35.8, 34.9, 34.2, 34.1, 33.2, 31.9, 31.3, 28.6, 27.6, 25.7, 22.9, 21.6, 21.1, 16.6, 16.6, 16.4, 12.3; IR: 2926.7, 2851.2, 1737.3, 1456.2, 1376.7, 1245.9, 1026.6 cm<sup>-1</sup>; ESI-MS: 457.3 [M+H]<sup>+</sup>; HRMS (MALDI) (M+Na)<sup>+</sup> calculated for C<sub>29</sub>H<sub>44</sub>O<sub>4</sub> 479.3155, found 479.3149.

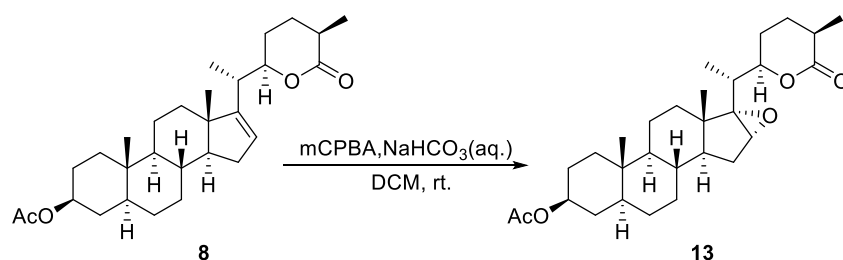

To a solution of **8** (913 mg, 2 mmol) in DCM (20 mL) were added saturated aqueous NaHCO<sub>3</sub> (8 mL) and *m*CPBA (863 mg, 4 mmol). The mixture was stirred at room temperature for 6 h, quenched with saturated aqueous Na<sub>2</sub>SO<sub>3</sub>, and extracted with CH<sub>2</sub>Cl<sub>2</sub> (40 + 20 mL). The combined organic layers were washed with brine, dried over Na<sub>2</sub>SO<sub>4</sub>, filtered, and concentrated under reduced pressure. The residue was purified by flash column chromatography on silica gel (PE/EA: 4/1) to give **13** (723 mg, 76.5%). mp 191.8-192.6 °C;  $[\alpha]_D^{25}$  -40.67 (*c* 0.1, CHCl<sub>3</sub>); <sup>1</sup>H NMR (400 MHz, CDCl<sub>3</sub>) δ 4.73 – 4.62 (m, 1H), 3.92 – 3.82 (m, 1H), 3.35 (s, 1H), 2.54 (dd, *J* = 16.8, 7.3 Hz, 1H), 2.39 – 2.28 (m, 1H), 2.02 (s, 3H), 1.20 (d, *J* = 6.6 Hz, 3H), 0.99 (d, *J* = 7.0 Hz, 4H), 0.86 (s, 4H), 0.83 (s, 3H); <sup>13</sup>C NMR (100 MHz, CDCl<sub>3</sub>) δ 176.1, 170.8, 77.8, 73.8, 71.5, 61.9, 54.7, 44.9, 44.9, 42.8, 36.8, 35.7, 34.8, 34.1, 34.0, 33.5, 33.2, 31.7, 28.6, 27.6, 25.6, 24.3, 21.6, 21.1, 16.3, 16.3, 12.5, 12.3; IR: 2921.8, 2851.7, 1750.2, 1732.4, 1456.0, 1378.9, 1260.5, 1197.9, 1025.9 cm<sup>-1</sup>; ESI-MS: 473.1 [M+H]<sup>+</sup>; HRMS (MALDI) (M+Na)<sup>+</sup> calculated for C<sub>29</sub>H<sub>44</sub>O<sub>5</sub> 495.3081, found 495.3089.

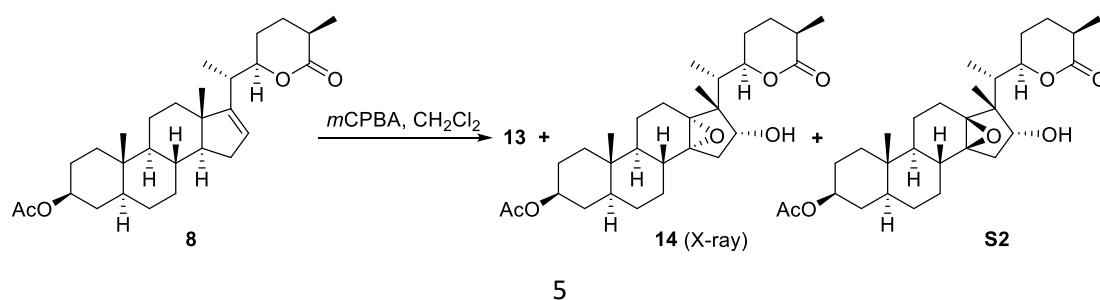

To a solution of **8** (645 mg, 1.41 mmol) in DCM (20 mL) was added *m*-CPBA (763 mg, 3.5 mmol). The mixture was stirred at room temperature for 24 h, quenched with saturated aqueous Na<sub>2</sub>SO<sub>3</sub>, and extracted with CH<sub>2</sub>Cl<sub>2</sub> (40 + 20 mL). The combined organic layers were washed with brine, dried over a<sub>2</sub>SO<sub>4</sub>, filtered, and concentrated under reduced pressure. The residue was purified by flash column chromatography on silica gel (PE/EA: 4/1 to 2/1) to give **13** (238 mg, 35.7%), **14** (301 mg, 43.7%), and **S2** (40 mg, 5.8%)

**14**: mp = 173.1-174.6 °C; <sup>1</sup>H NMR (400 MHz, CDCl<sub>3</sub>) δ 4.76 (t, *J* = 8.4 Hz, 1H), 4.72 – 4.63 (m, 1H), 3.83 (dd, *J* = 11.7, 4.9 Hz, 1H), 2.67 (d, *J* = 11.7 Hz, 1H), 2.65 – 2.57 (m, 1H), 2.02 (s, 3H), 1.20 (d, *J* = 6.7 Hz, 3H), 1.14 (d, *J* = 7.3 Hz, 3H), 1.07 (s, 3H), 0.76 (s, 3H); <sup>13</sup>C NMR (100 MHz, CDCl<sub>3</sub>) δ 176.5, 170.8, 80.6, 77.5, 74.5, 73.5, 69.8, 51.7, 46.1, 43.9, 43.3, 38.5, 38.3, 36.9, 35.2, 33.9, 33.0, 28.6, 28.4, 27.4, 25.8, 25.3, 24.5, 23.7, 23.2, 21.6, 16.2, 14.9, 11.5; IR: 3520.9, 2928.7, 2870.5, 1738.1, 1732.0, 1244.1, 1051.8, 1020.7 cm<sup>-1</sup>; ESI-MS: 511.1 [M+Na]<sup>+</sup>; HRMS (MALDI) (M+Na)<sup>+</sup> calculated for C<sub>29</sub>H<sub>44</sub>O<sub>6</sub> 511.3030, found 511.3035.

**S2**: <sup>1</sup>H NMR (400 MHz, CDCl<sub>3</sub>) δ 4.87 (dd, *J* = 10.5, 4.5 Hz, 1H), 4.74 – 4.63 (m, 1H), 3.82 (t, *J* = 7.9 Hz, 1H), 2.65 – 2.53 (m, 1H), 2.33 (dd, *J* = 13.7, 8.0 Hz, 1H), 2.02 (s, 3H), 1.23 (s, 3H), 1.21 (d, *J* = 6.9 Hz, 3H), 1.05 (d, *J* = 7.5 Hz, 3H), 0.74 (s, 3H), 0.66 (t, *J* = 11.3 Hz, 1H); <sup>13</sup>C NMR (100 MHz, CDCl<sub>3</sub>) δ 177.0, 170.9, 80.2, 79.9, 73.6, 72.7, 70.5, 51.2, 47.55, 44.57, 42.38, 38.79, 36.88, 36.33, 35.93, 33.69, 32.89, 30.17, 29.07, 27.31, 25.69, 24.77, 23.13, 21.54, 20.82, 18.38, 16.15, 12.37, 11.69; IR: 3466.2, 2932.0, 2855.1, 1731.7, 1377.7, 1244.9, 1066.7, 1027.7 cm<sup>-1</sup>; ESI-MS: 511.5 [M+Na]<sup>+</sup>; HRMS (MALDI) (M+Na)<sup>+</sup> calculated for C<sub>29</sub>H<sub>44</sub>O<sub>6</sub> 511.3030, found 511.3022.

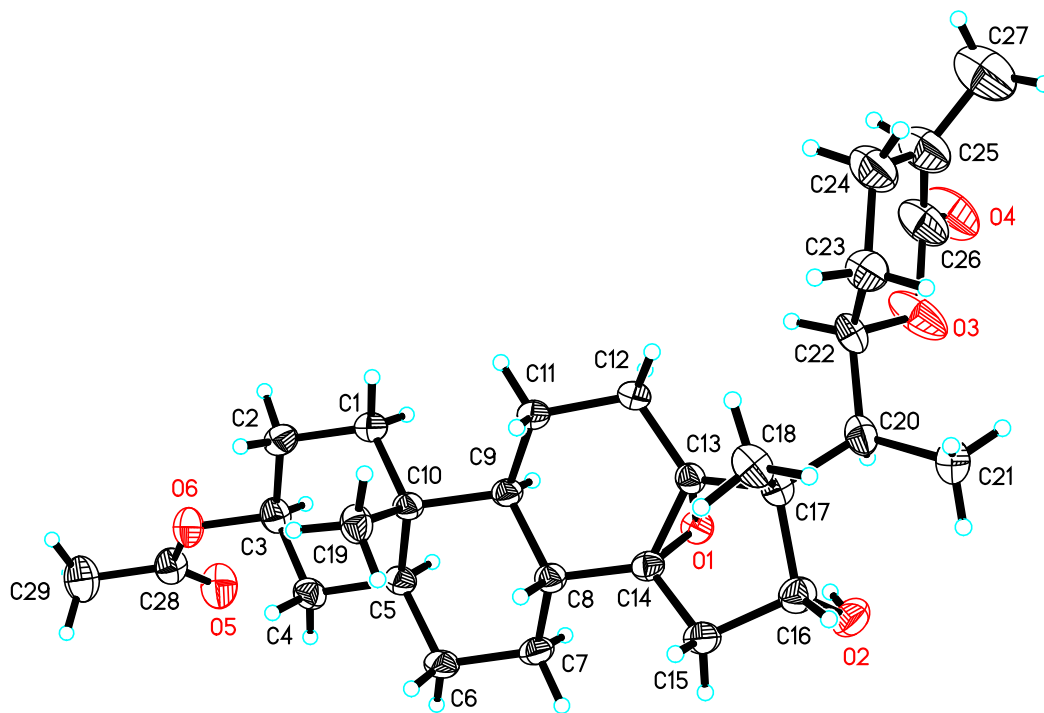

**Table 1.** Crystal Data and Structure Refinement for **14**

|                                                  |                                                                                                                                              |
|--------------------------------------------------|----------------------------------------------------------------------------------------------------------------------------------------------|
| Empirical formula                                | C <sub>29</sub> H <sub>44</sub> O <sub>6</sub>                                                                                               |
| Formula weight                                   | 488.64                                                                                                                                       |
| Temperature (K)                                  | 293(2)                                                                                                                                       |
| wavelength                                       | 0.71073 Å                                                                                                                                    |
| Crystal system , Space group                     | Monoclinic , P2(1)                                                                                                                           |
| Unit cell dimensions                             | $a$ (Å) = 9.9607 (10), $\alpha$ (deg) = 90<br>$b$ (Å) = 7.2910 (8), $\beta$ (deg) = 91.928(2)<br>$c$ (Å) = 18.5284 (19), $\gamma$ (deg) = 90 |
| Volume (Å <sup>3</sup> )                         | 1339.9 (2)                                                                                                                                   |
| Z, Calculated density (g/cm <sup>3</sup> )       | 2, 1.211                                                                                                                                     |
| Absorption coefficient (mm <sup>-1</sup> )       | 0.071                                                                                                                                        |
| F(000)                                           | 532                                                                                                                                          |
| Crystal size (mm)                                | 0.211 * 0.154 * 0.117                                                                                                                        |
| The Range for data collection (deg)              | 2.05 - 25.99                                                                                                                                 |
| Limiting indices                                 | -11 ≤ h ≤ 12, -8 ≤ k ≤ 8, -22 ≤ l ≤ 21                                                                                                       |
| Reflections collected/ unique                    | 8136/ 4367 [R(int) = 0.0290]                                                                                                                 |
| Completeness to theta = 27.00                    | 99.9%                                                                                                                                        |
| Absorption correction                            | Empirical                                                                                                                                    |
| Max. and min. transmission                       | 1.00000 and 0.68398                                                                                                                          |
| Refinement method                                | Full-matrix least-squares on F <sup>2</sup>                                                                                                  |
| Data/ restraints/ parameter                      | 4763/ 55 /368                                                                                                                                |
| Goodness-of-fit on F <sup>2</sup>                | 1.035                                                                                                                                        |
| Final R ( I > 2σ(I) )                            | R <sub>1</sub> = 0.0583, wR <sub>2</sub> = 0.1516                                                                                            |
| R indices (all data)                             | R <sub>1</sub> = 0.0638, wR <sub>2</sub> = 0.1574                                                                                            |
| Absolute structure parameter                     | -1.8 (14)                                                                                                                                    |
| Largest diff. peak and hole (e.Å <sup>-3</sup> ) | 0.215 and -0.242                                                                                                                             |

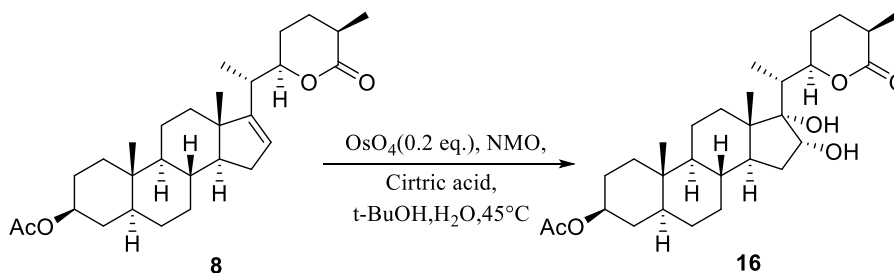





$\delta$  177.1, 170.8, 85.4, 84.2, 78.2, 73.6, 53.6, 48.8, 48.6, 44.7, 42.1, 39.8, 36.7, 35.5, 35.3, 34.0, 32.9, 32.9, 32.4, 32.0, 28.4, 27.5, 25.7, 22.9, 21.6, 20.6, 16.1, 15.4, 12.3, 8.8; IR: 3519.0, 2926.3, 2865.9, 2853.9, 1732.3, 1462.6, 1349.2, 1248.7, 1175.2  $\text{cm}^{-1}$ ; ESI-MS: 591.0,  $[\text{M}+\text{Na}]^+$ ; HRMS (MALDI)  $(\text{M}+\text{Na})^+$  calculated for  $\text{C}_{30}\text{H}_{48}\text{O}_8\text{S}$  591.2962, found 591.2964.

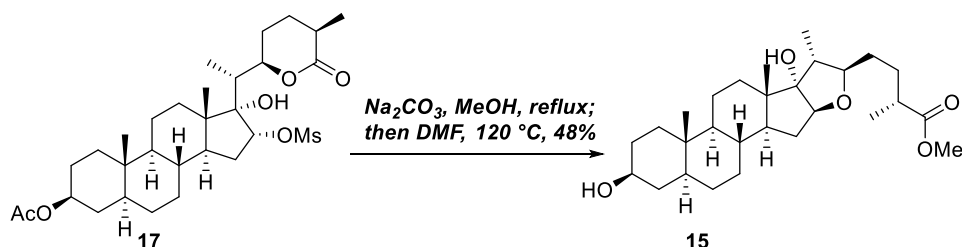

To a solution of **17** (142 mg, 0.25 mmol) in  $\text{CH}_3\text{OH}$  (5 mL), sodium carbonate (106 mg, 1 mmol) was added, the mixture was heated to reflux for 12 h. Then  $\text{CH}_3\text{OH}$  was removed in vacuo, and DMF (4 mL) was added, the resulting solution was heated to 120  $^\circ\text{C}$  for 12 h, then DMF was removed under reduced pressure, the residue was diluted with water, and extracted with  $\text{CH}_2\text{Cl}_2$  (30 + 10 mL), washed with brine, dried over sodium sulfate. After removal of the organic solvents under reduced pressure, the residue was subjected to silica gel chromatography (PE/EA = 3:1 to 2:1) to give desired **15** (55 mg, 48%).

$^1\text{H}$  NMR (400 MHz,  $\text{CDCl}_3$ )  $\delta$  3.85 (t,  $J = 6.8$  Hz, 1H), 3.67 (s, 3H), 3.64 – 3.54 (m, 1H), 3.49 (td,  $J = 9.0, 2.8$  Hz, 1H), 2.46 (dd,  $J = 13.9, 7.0$  Hz, 1H), 2.11 – 2.02 (m, 1H), 1.90 (td,  $J = 14.0, 6.9$  Hz, 1H), 1.16 (d,  $J = 7.0$  Hz, 4H), 0.86 (d,  $J = 6.9$  Hz, 4H), 0.82 (s, 3H), 0.80 (s, 3H), 0.64 (td,  $J = 11.0, 3.6$  Hz, 1H);  $^{13}\text{C}$  NMR (100 MHz,  $\text{CDCl}_3$ )  $\delta$  177.3, 91.6, 91.2, 88.9, 71.4, 54.0, 52.5, 51.7, 45.0, 44.9, 41.1, 39.8, 38.3, 37.1, 35.7, 35.7, 32.2, 32.0, 31.6, 31.2, 31.2, 30.7, 28.7, 20.7, 17.4, 17.3, 12.5, 11.4; IR: 3406.1, 2954.8, 2923.7, 2852.3, 1738.1, 1462.9, 1377.1, 1186.4, 1155.3  $\text{cm}^{-1}$ ; ESI-MS: 463.3  $[\text{M}+\text{H}]^+$ , 485.4  $[\text{M}+\text{Na}]^+$ ; HRMS (MALDI)  $(\text{M}+\text{Na})^+$  calculated for  $\text{C}_{28}\text{H}_{46}\text{O}_5$  485.3237, found 485.3257.

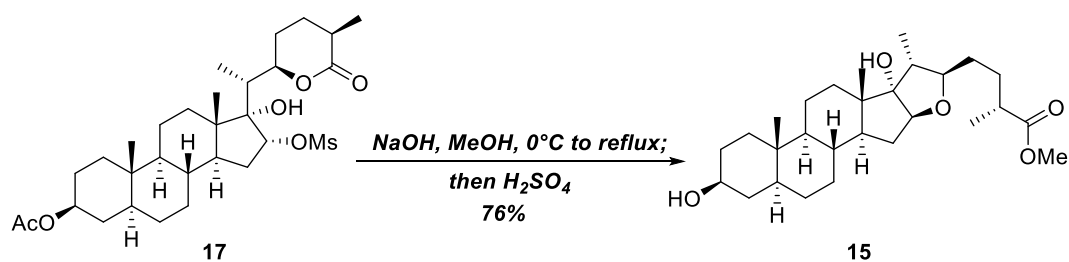

To a solution of **17** (142 mg, 0.25 mmol) in CH<sub>3</sub>OH (8 mL) was added NaOH (200 mg, 5 mmol) at 0 °C. The mixture was stirred at 0 °C, and after TLC indicated complete conversion of the starting material, was heated to reflux for 5 h. Then the mixture was cooled to 0 °C and was added concentrated sulfuric acid (0.35 mL, 6.4 mmol) dropwise, and stirred at ambient temperature for 2 h and quenched with saturated aqueous Na<sub>2</sub>CO<sub>3</sub> and extracted with CHCl<sub>3</sub> (30 + 15 mL). The combined organic layers were washed with brine, dried over Na<sub>2</sub>SO<sub>4</sub>, and concentrated at reduced pressure. Purification of the residue by flash column chromatography on silica gel (PE/EA: 2/1) provided **15** (87 mg, 75%). This method may caused slight isomerization of C25, which would be restalled in the following steps.

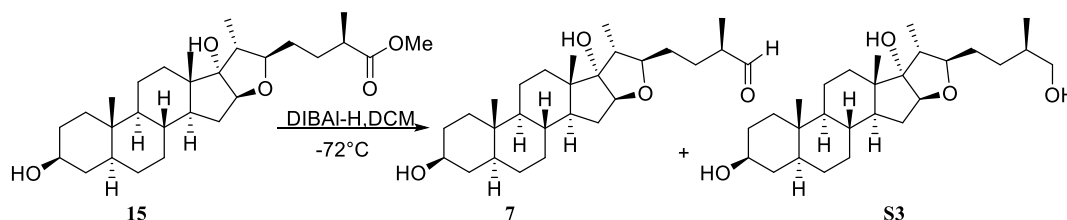

Under argon, to a solution of **15** (87 mg, 0.188 mmol) in DCM (5 mL) was added DIBAL-H (0.6 mL, 1 M in hexane, 0.6 mmol) dropwise at -72 °C. The mixture was stirred at -72 °C for 40 min, quenched with CH<sub>3</sub>OH (2 mL), warmed to ambient temperature. After its pH value was adjusted with HCl (1.2 N) to 2, the mixture was extracted with CHCl<sub>3</sub> (30 + 15 mL). The combined organic layers were washed with brine, dried over Na<sub>2</sub>SO<sub>4</sub>, filtered, and concentrated under reduced pressure. Purification of the residue by flash column chromatography on silica gel (PE/EA: 3/1 to 1/1) gave **7** (68 mg, 83.7%) and over reduced product **S3** (12 mg, 14.7%).

**7**: <sup>1</sup>H NMR (400 MHz, CDCl<sub>3</sub>) δ 9.62 (s, 1H), 3.86 (t, *J* = 6.8 Hz, 1H), 3.63 – 3.55 (m, 1H), 3.51 (t, *J* = 8.2 Hz, 1H), 2.38 (dd, *J* = 12.9, 6.4 Hz, 1H), 1.10 (d, *J* = 6.9 Hz, 3H), 0.87 (d, *J* = 6.9 Hz, 3H), 0.82 (s, 3H), 0.80 (s, 3H), 0.69 – 0.60 (m, 1H); <sup>13</sup>C NMR (100 MHz, CDCl<sub>3</sub>) δ 205.3, 91.6, 91.2, 88.7, 88.6, 71.3, 54.1, 52.5, 46.4, 46.4, 45.0, 44.9, 41.0, 41.0, 38.2, 37.2, 35.6, 32.2, 32.0, 31.5, 31.2, 30.6, 28.6, 27.3, 20.7, 17.3, 13.5, 12.5, 11.3; IR: 3458.5, 3339.1, 2953.9, 2923.8, 2851.4, 1733.4, 1717.6, 1457.8, 1376.8 cm<sup>-1</sup>; ESI-MS: 455.2 [M+Na]<sup>+</sup>; HRMS (MALDI) (M+Na)<sup>+</sup> calculated for C<sub>27</sub>H<sub>44</sub>O<sub>4</sub> 455.3131, found 455.3133.

**S3**: <sup>1</sup>H NMR (400 MHz, CDCl<sub>3</sub>) δ 3.86 (t, *J* = 6.8 Hz, 1H), 3.59 (td, *J* = 10.7, 5.2 Hz, 1H), 3.54 – 3.41 (m, 3H), 2.11 – 2.02 (m, 1H), 1.98 – 1.88 (m, 1H), 0.92 (d, *J* = 6.7 Hz, 3H), 0.87 (d, *J* = 6.8 Hz, 4H), 0.82 (s, 3H), 0.81 (s, 3H), 0.66 (td, *J* = 10.9, 3.6 Hz, 1H);

$^{13}\text{C}$  NMR (100 MHz,  $\text{CDCl}_3$ )  $\delta$  91.6, 91.6, 91.2, 89.5, 89.3, 71.4, 68.2, 68.1, 54.0, 52.5, 45.0, 44.9, 41.1, 38.3, 37.1, 36.1, 35.9, 35.7, 35.7, 32.2, 32.0, 31.6, 31.2, 30.7, 30.5, 29.8, 29.7, 28.7, 20.7, 17.4, 16.9, 16.7, 12.5, 11.4, 11.4; IR: 3397.5, 2923.9, 2851.5, 1458.4, 1377.3  $\text{cm}^{-1}$ ; ESI-MS: 435.3  $[\text{M}+\text{H}]^+$ ; HRMS (MALDI)  $(\text{M}+\text{H})^+$  calculated for  $\text{C}_{27}\text{H}_{47}\text{O}_4$  435.3469, found 435.3463.

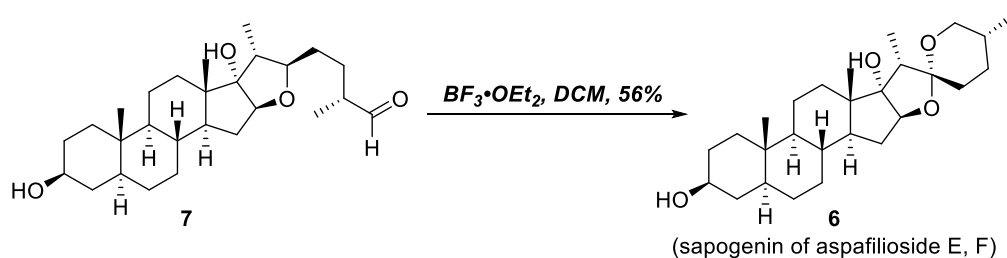

To a solution of **7** (34 mg, 0.078 mmol) in dried  $\text{CH}_2\text{Cl}_2$  (2 mL) was added  $\text{BF}_3 \cdot \text{OEt}_2$  (50  $\mu\text{L}$ , 0.4 mmol) at ambient temperature. The mixture was stirred 6 h, quenched with water, added HCl (1.2 N, 0.1 mL), stirred for 1 h, and extracted with  $\text{CHCl}_3$  (25 + 15 mL). The combined organic layers were washed with brine, dried over  $\text{Na}_2\text{SO}_4$ , filtered, and concentrated under reduced pressure. Purification of the crude product by flash column chromatography on silica gel (PE/EA: 3/1) afforded **6** (19 mg, 56%).  $[\alpha]_{\text{D}}^{24.8} - 57.08$  ( $c$  0.1,  $\text{CHCl}_3$ );  $^1\text{H}$  NMR (400 MHz,  $\text{CDCl}_3$ )  $\delta$  3.95 (t,  $J = 7.6$  Hz, 1H), 3.62 – 3.55 (m, 1H), 3.50 (dd,  $J = 10.4, 2.6$  Hz, 1H), 3.37 (t,  $J = 10.8$  Hz, 1H), 2.04 (dq,  $J = 21.0, 7.1$  Hz, 2H), 0.89 (d,  $J = 7.1$  Hz, 3H), 0.82 (s, 3H), 0.80 (d,  $J = 4.8$  Hz, 3H), 0.79 (s, 3H), 0.69 (td,  $J = 11.6, 3.6$  Hz, 1H);  $^{13}\text{C}$  NMR (100 MHz,  $\text{CDCl}_3$ )  $\delta$  110.2, 91.1, 90.2, 71.4, 67.0, 54.1, 52.8, 44.9, 44.8, 44.2, 38.3, 37.1, 35.7, 35.3, 32.3, 32.0, 31.6, 31.2, 30.9, 30.2, 28.7, 28.2, 21.0, 17.4, 17.2, 12.5, 8.2; IR: 3366.9, 2954.8, 2924.5, 2853.3, 1457.6, 1376.8, 1154.6  $\text{cm}^{-1}$ ; ESI-MS: 455.3,  $[\text{M}+\text{Na}]^+$ ; HRMS (MALDI)  $(\text{M}+\text{Na})^+$  calculated for  $\text{C}_{27}\text{H}_{44}\text{O}_4$  455.3131, found 455.3122.

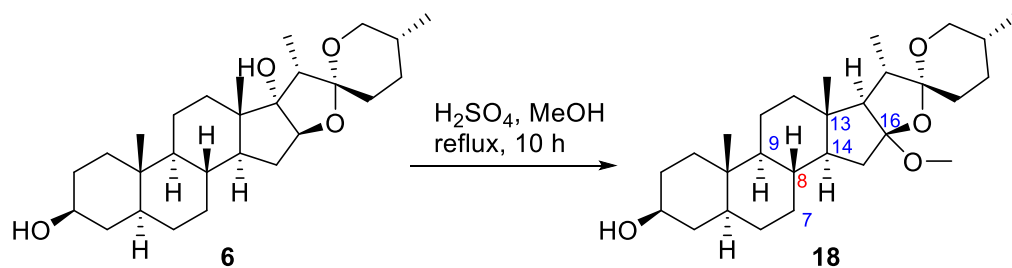

A solution of **6** (42 mg, 0.098 mmol) in MeOH (5 mL) was treated with 1M  $\text{H}_2\text{SO}_4$  (10 mL), and the mixture was heated to reflux for 10 h. The reaction mixture was

neutralized with a saturated aqueous solution of Na<sub>2</sub>SO<sub>4</sub> and extracted with CHCl<sub>3</sub> (20 mL\*3). The combined organic layers were washed with brine, dried over MgSO<sub>4</sub>, filtered, and concentrated under reduced pressure. Purification of the crude product by flash column chromatography on silica gel (PE/EA: 6/1 to 3/1, 5% CH<sub>2</sub>Cl<sub>2</sub>) afforded **18** (20 mg, 46%) as white powder.  $[\alpha]_D^{25}$  -21.8 (*c* 0.10, MeOH/CHCl<sub>3</sub>, ref.<sup>3</sup> -23 (*c* 0.10, MeOH/CHCl<sub>3</sub>)); <sup>1</sup>H NMR (400 MHz, pyridine-d<sub>5</sub>) δ 3.82-3.92 (m, 1H), 3.72-3.78 (m, 1H), 3.63-3.70 (m, 1H), 2.20-2.26 (m, 1H), 1.21 (d, *J* = 6.6 Hz, 3H), 0.84 (s, 3H), 0.82 (s, 3H); <sup>13</sup>C NMR (100 MHz, pyridine-d<sub>5</sub>, the biggest chemical shift (119.66 ppm) was set as 119.3 ppm for comparison) δ 119.3, 111.0, 70.5, 70.2, 68.8, 55.3, 54.5, 50.6, 45.1, 42.7, 41.2, 40.1, 39.3, 37.4, 35.9, **34.8**<sup>4</sup>, 34.5, 34.0, 32.5, 32.4, 30.6, 29.5, 29.0, 21.3, 17.4, 15.8, 15.7, 12.5; IR: 2926, 1448, 1385, 1247, 1045, 977, 890, 878 cm<sup>-1</sup>; ESI-MS: 469.3 [M+Na]<sup>+</sup>.

---

<sup>3</sup> Zhou, L.-B.; Chen, D.-F. Steroidal saponins from the roots of *Asparagus filicinus*. *Steroids* **2008**, *73*, (1), 83-87

<sup>4</sup> All the NMR data matched those reported except the <sup>13</sup>C NMR chemical shift of C8. The reason was unknown.

|          | <sup>1</sup> H NMR<br>reported <b>18</b> | <sup>13</sup> C NMR<br>reported <b>18</b> | <sup>1</sup> H NMR<br>synthesized <b>18</b> | <sup>13</sup> C NMR<br>synthesized <b>18</b> |
|----------|------------------------------------------|-------------------------------------------|---------------------------------------------|----------------------------------------------|
| 1        | 0.94 m, 1.70 m                           | 37.4                                      |                                             | 37.4                                         |
| 2        | 1.70 m, 2.08 m                           | 32.5                                      |                                             | 32.5                                         |
| 3        | 3.87 m                                   | 70.5                                      | 3.87 m (3.82-3.92)                          | 70.5                                         |
| 4        | 1.61 m, 1.83 m                           | 39.3                                      |                                             | 39.3                                         |
| 5        | 1.14 m                                   | 45.1                                      |                                             | 45.1                                         |
| 6        | 1.27 m                                   | 29.0                                      |                                             | 29.0                                         |
| 7        | 0.89 m, 1.63 m                           | 32.4                                      |                                             | 32.4                                         |
| <b>8</b> | <b>1.34 m</b>                            | <b>30.0</b>                               |                                             | <b>34.8</b>                                  |
| 9        | 0.61 m                                   | 54.8                                      | 0.61 m                                      | 54.5                                         |
| 10       | --                                       | 35.9                                      |                                             | 35.9                                         |
| 11       | 1.30 m, 1.52 m                           | 21.3                                      |                                             | 21.3                                         |
| 12       | 1.23 m, 1.72 m                           | 40.1                                      |                                             | 40.1                                         |
| 13       | --                                       | 41.2                                      |                                             | 41.2                                         |
| 14       | 1.50 m                                   | 55.4                                      |                                             | 55.3                                         |
| 15       | 1.40 m, 2.23 m                           | 34.0                                      | 2.23 m (2.20-2.26)                          | 34.0                                         |
| 16       | --                                       | 119.3                                     |                                             | 119.3                                        |
| 17       | 2.10 m                                   | 70.2                                      |                                             | 70.2                                         |
| 18       | 0.84 s                                   | 15.8                                      | 0.84 s                                      | 15.8                                         |
| 19       | 0.82 s                                   | 12.5                                      | 0.82 s                                      | 12.5                                         |
| 20       | 2.11 m                                   | 42.7                                      |                                             | 42.7                                         |
| 21       | 1.21 d (6.6)                             | 15.7                                      | 1.21 d (6.6)                                | 15.7                                         |
| 22       | --                                       | 111.0                                     |                                             | 111.0                                        |
| 23       | 1.70 m, 1.78 m                           | 34.5                                      |                                             | 34.5                                         |
| 24       | 1.63 m                                   | 29.5                                      |                                             | 29.5                                         |
| 25       | 1.63 m                                   | 30.6                                      |                                             | 30.6                                         |
| 26       | 3.69 m, 3.75 m                           | 68.8                                      | 3.72-3.78 m<br>3.63-3.70 m                  | 68.8                                         |
| 27       | 0.75 d (5.6)                             | 17.4                                      | 0.75 d (5.6)                                | 17.4                                         |
| OMe      | 3.48 s                                   | 50.6                                      | 3.48 s                                      | 50.6                                         |

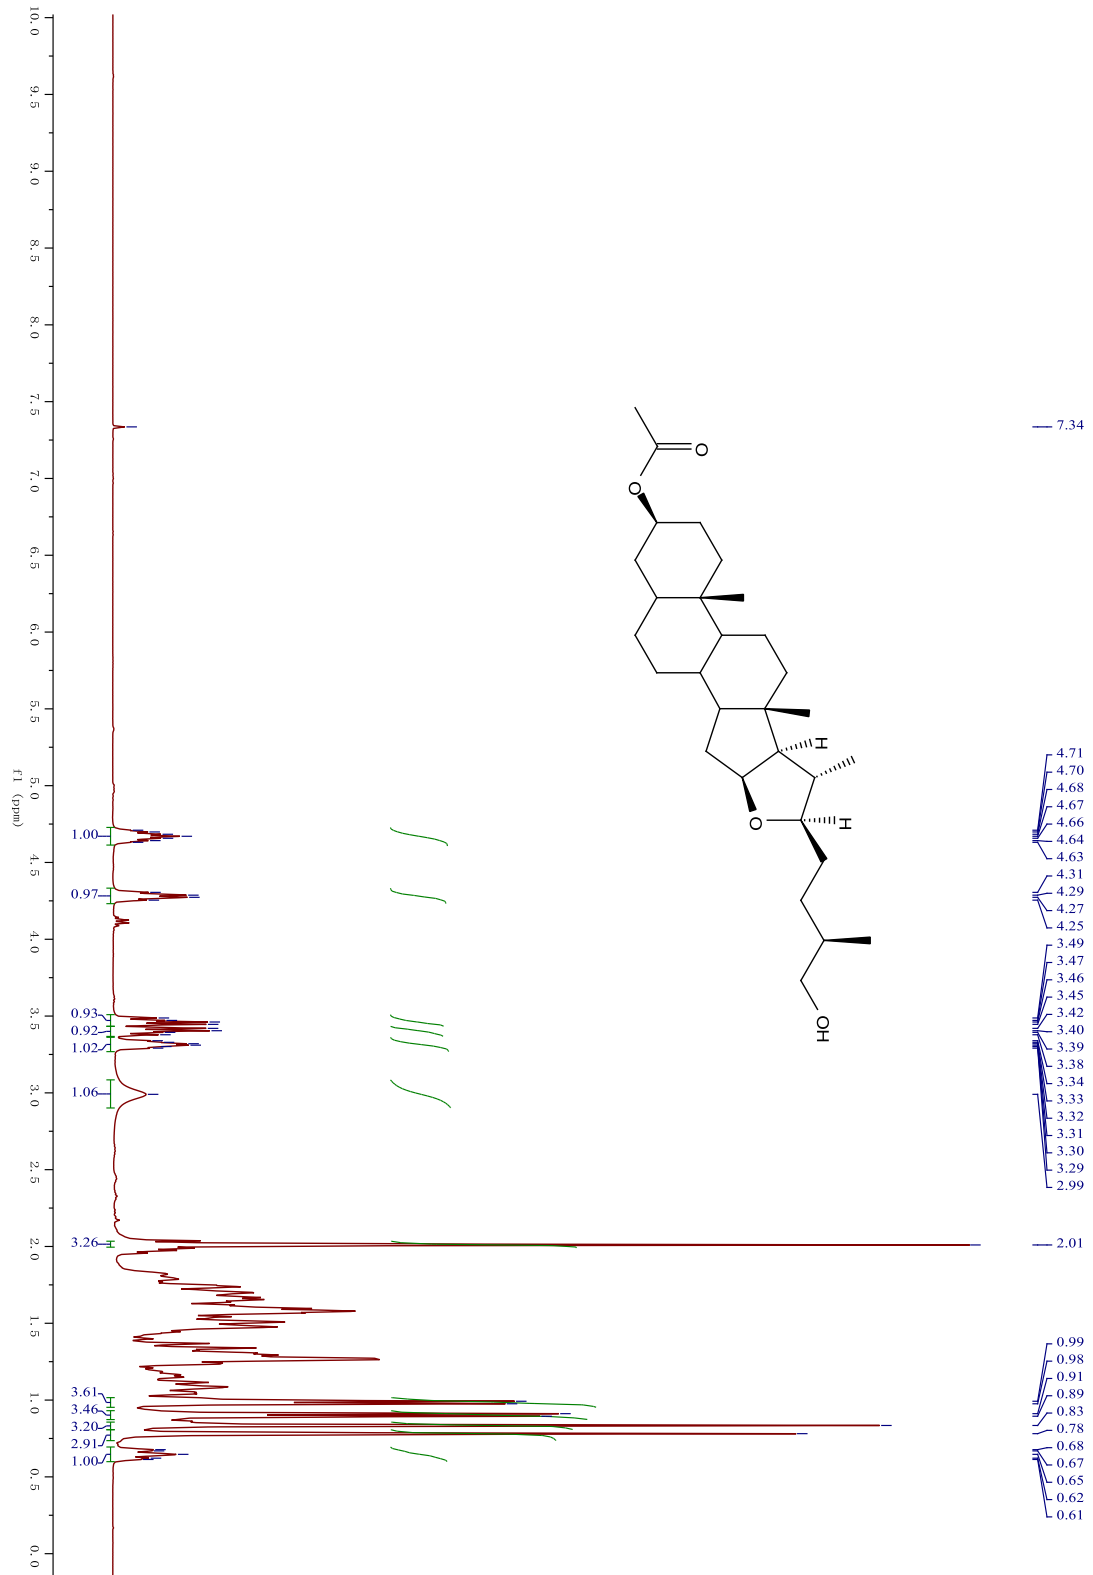

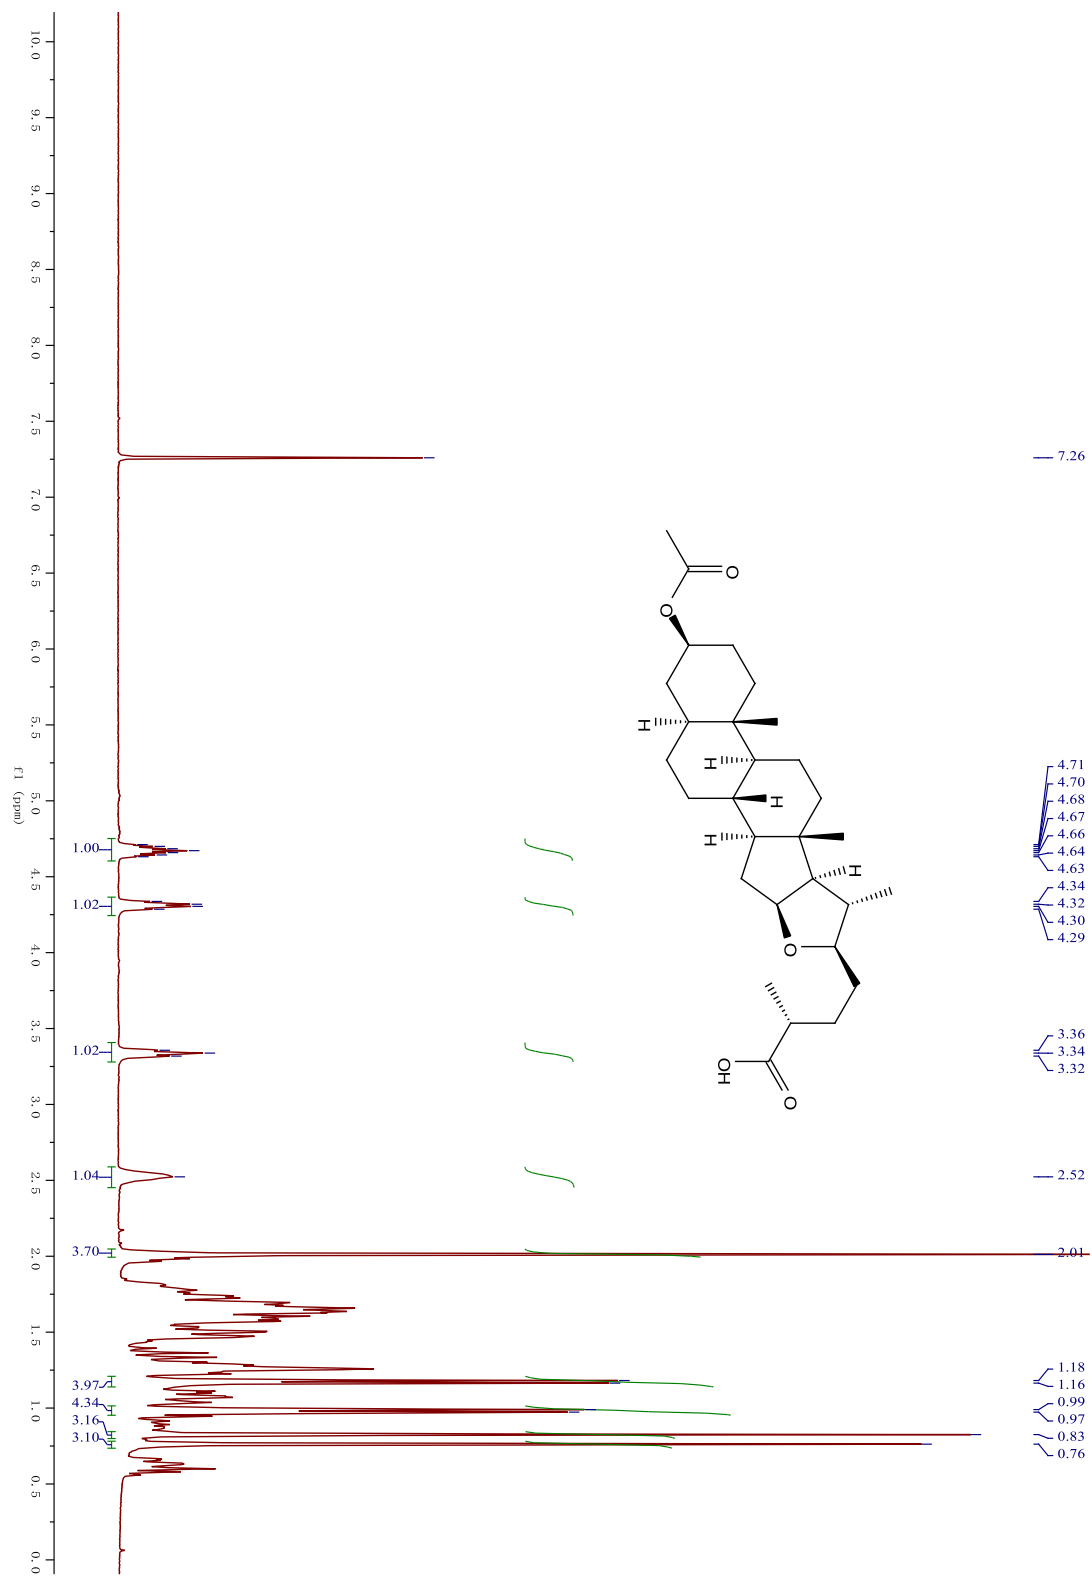





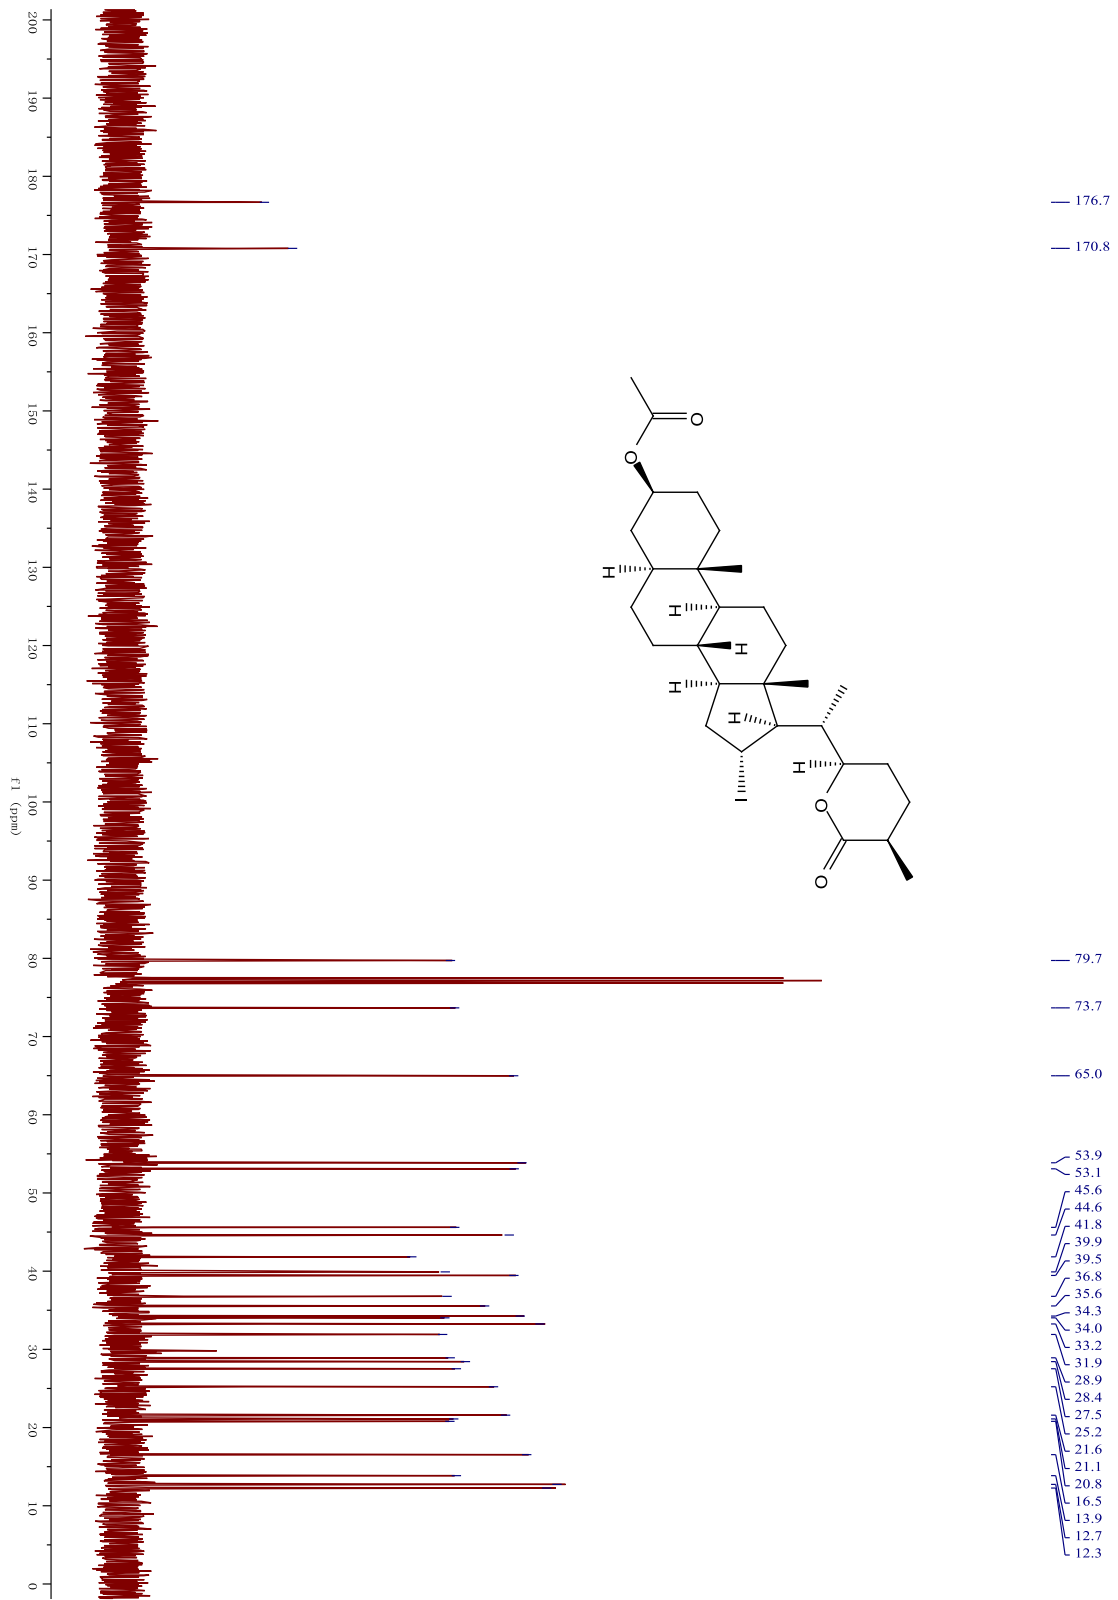

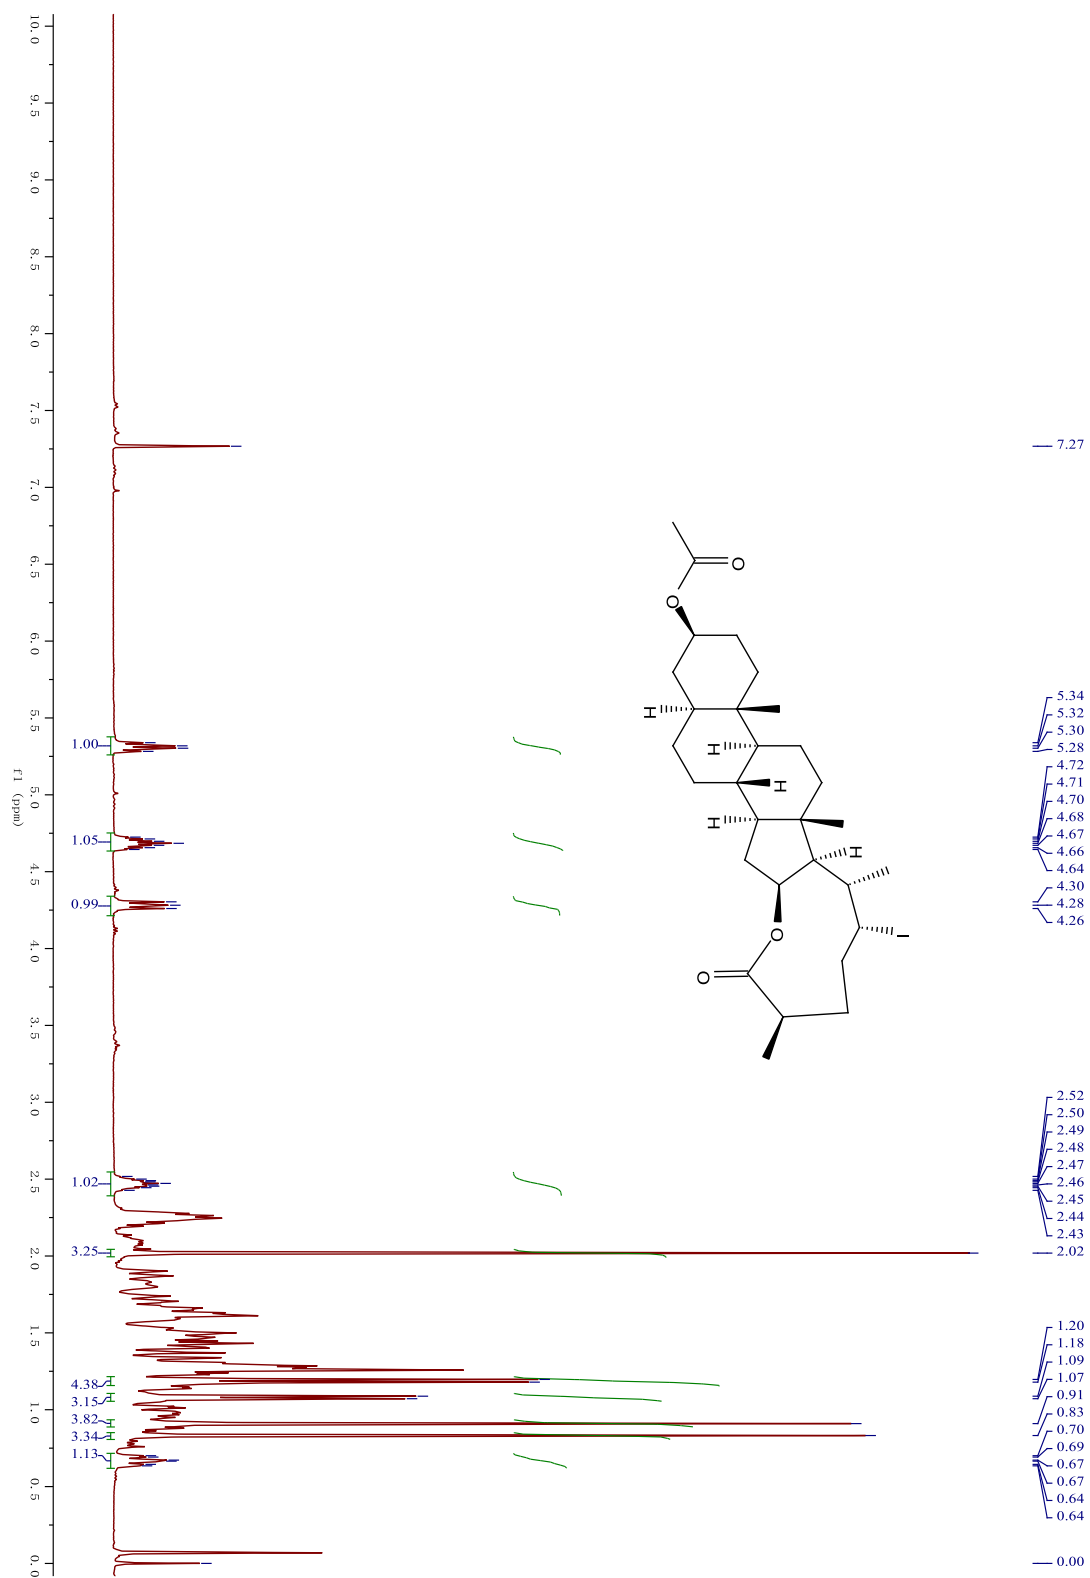

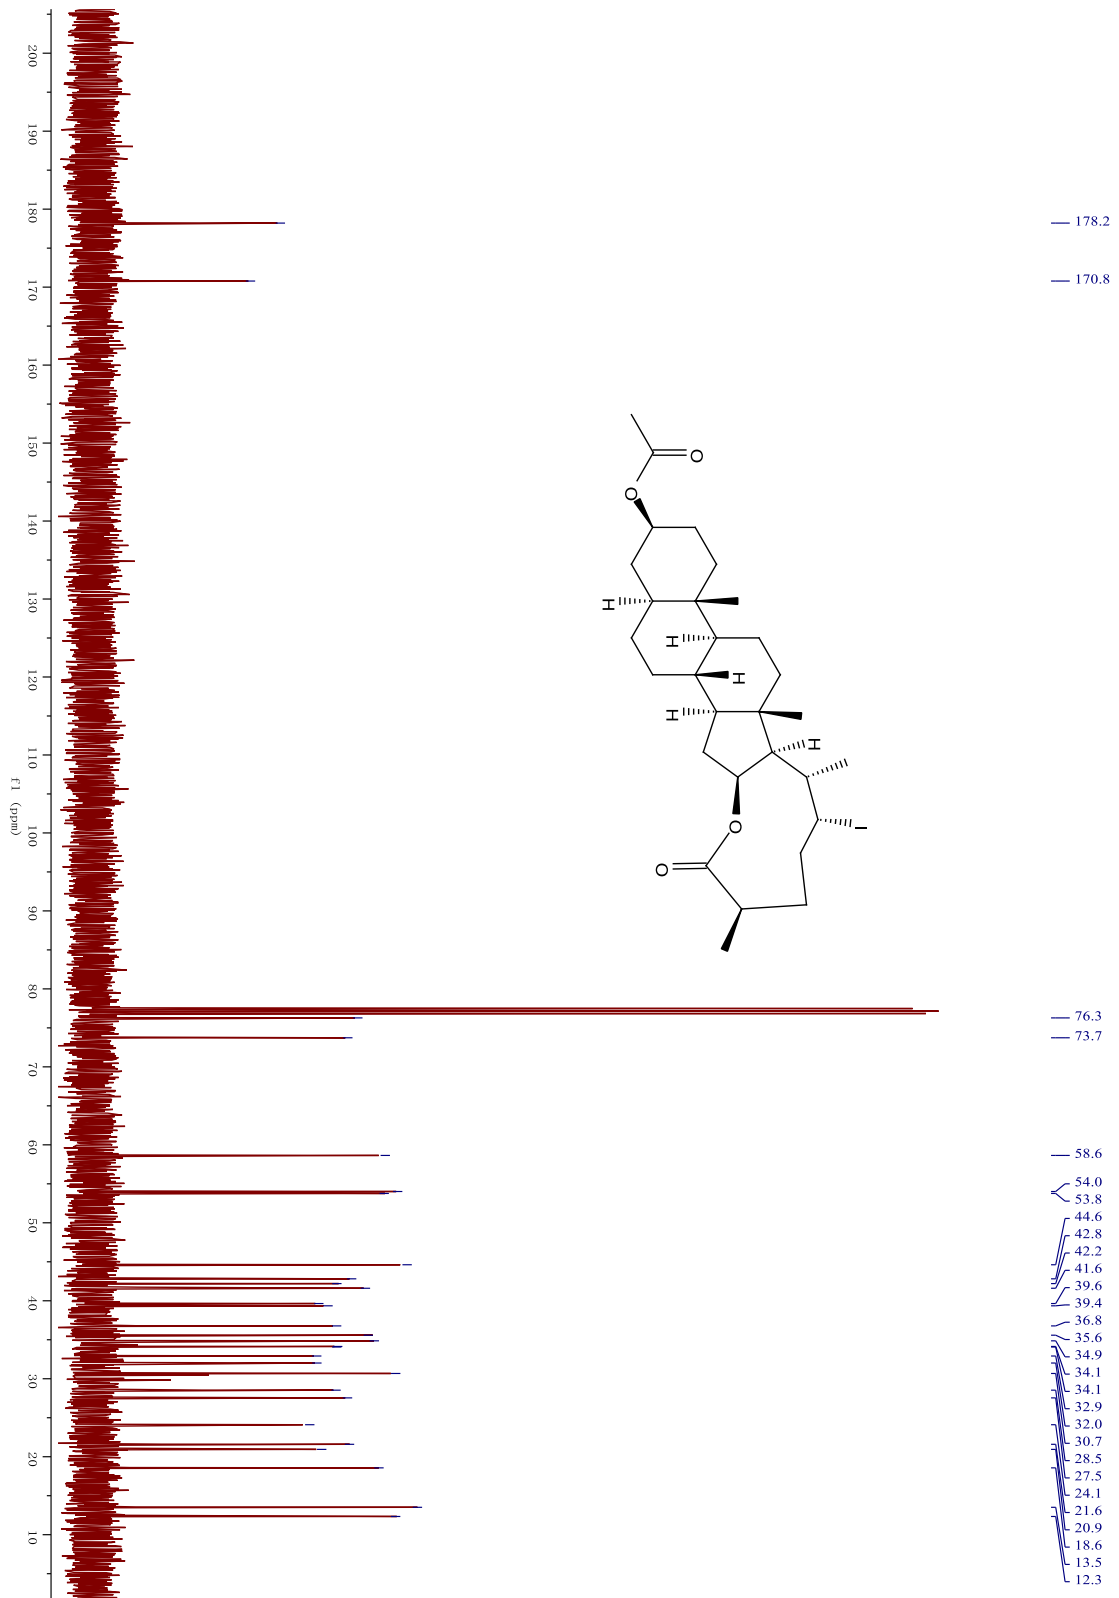

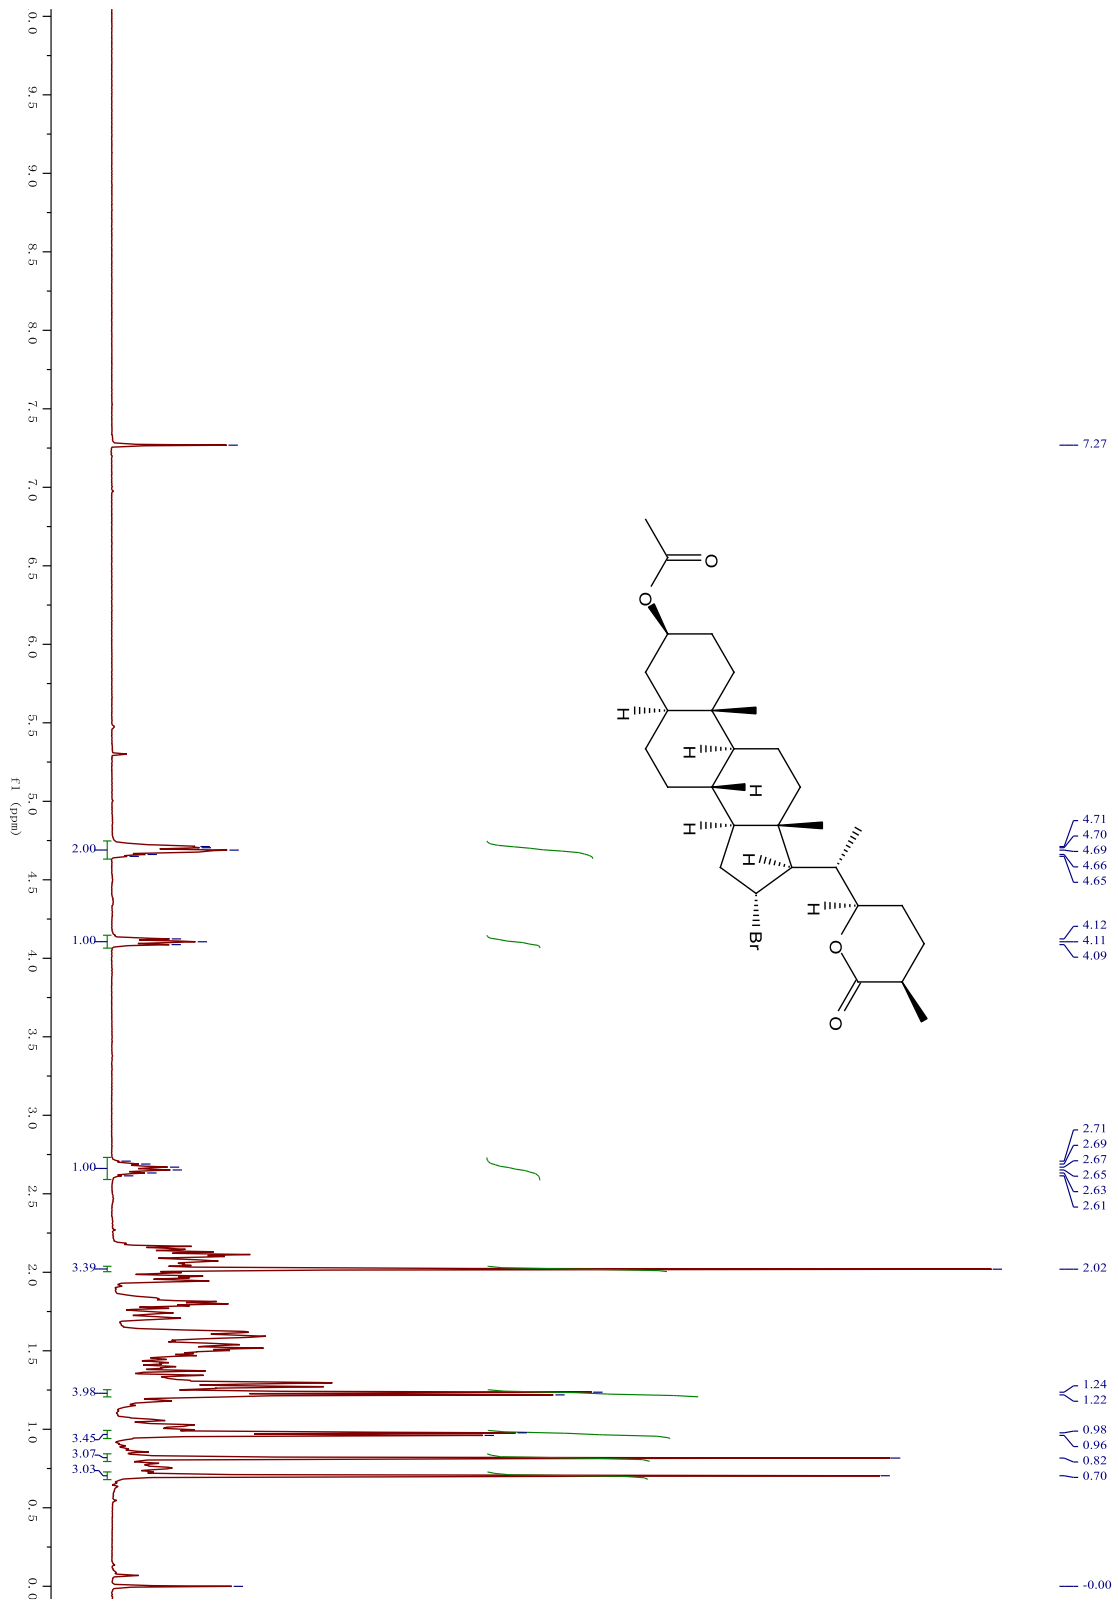

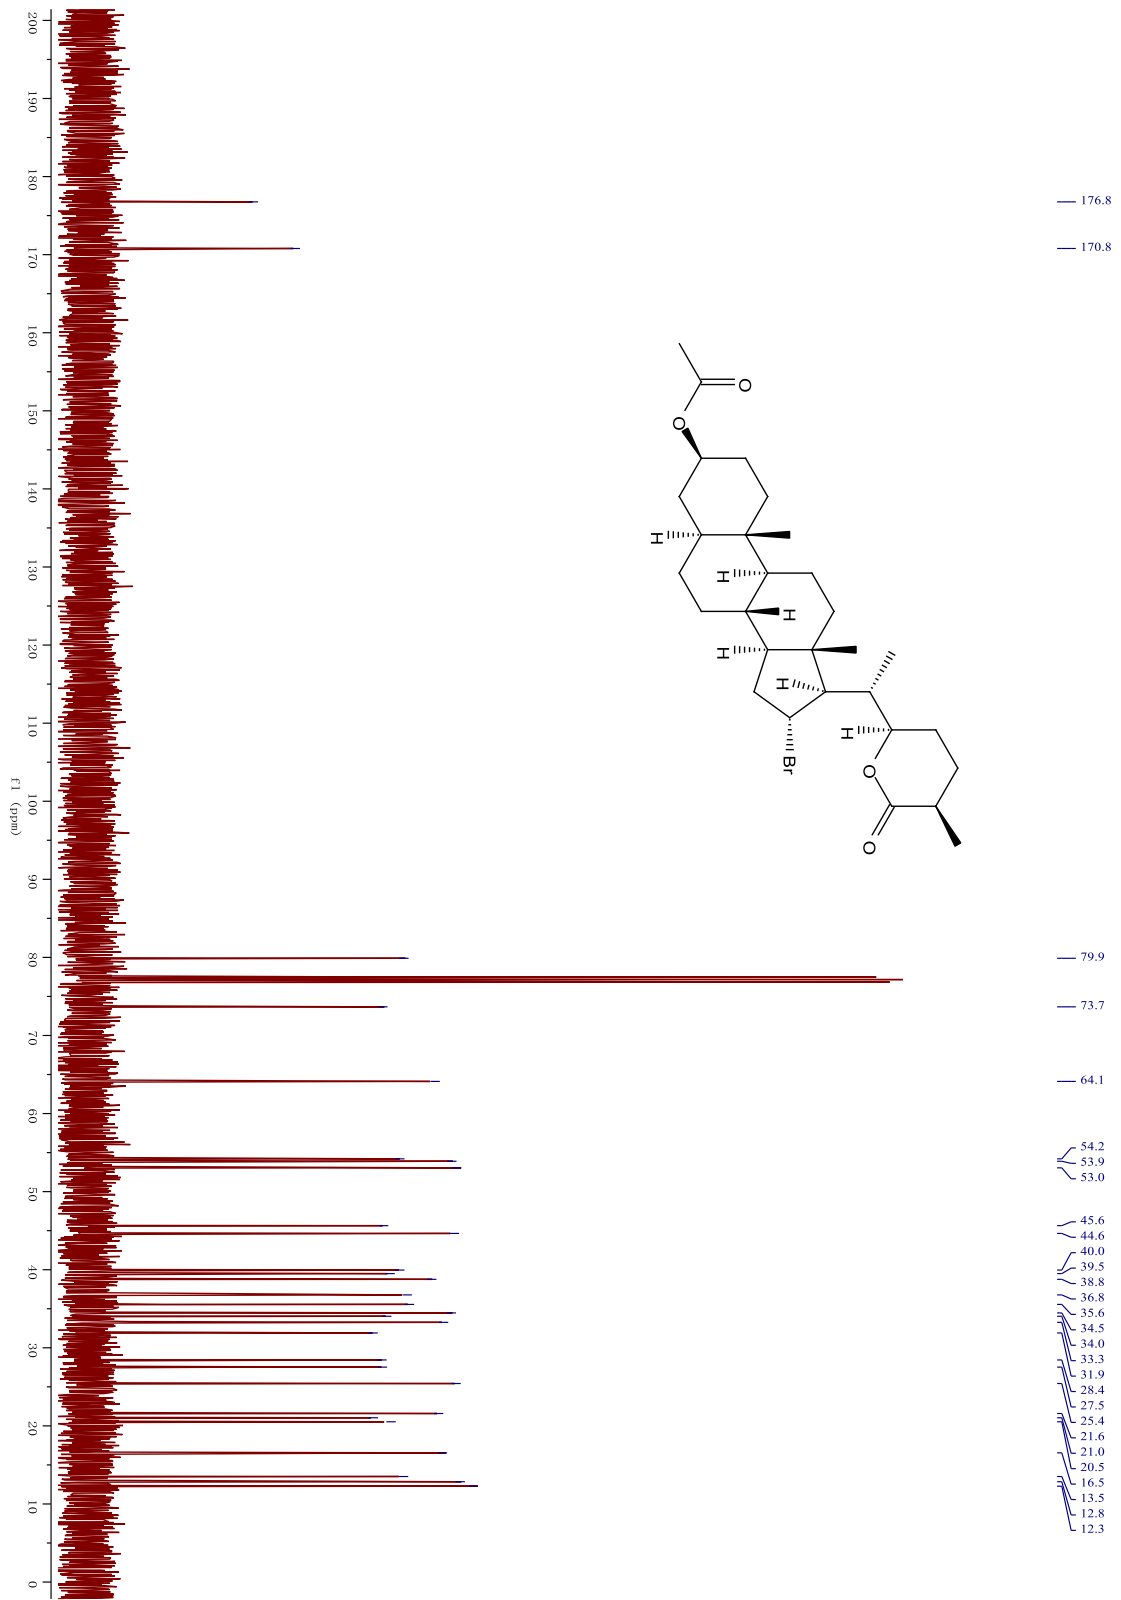

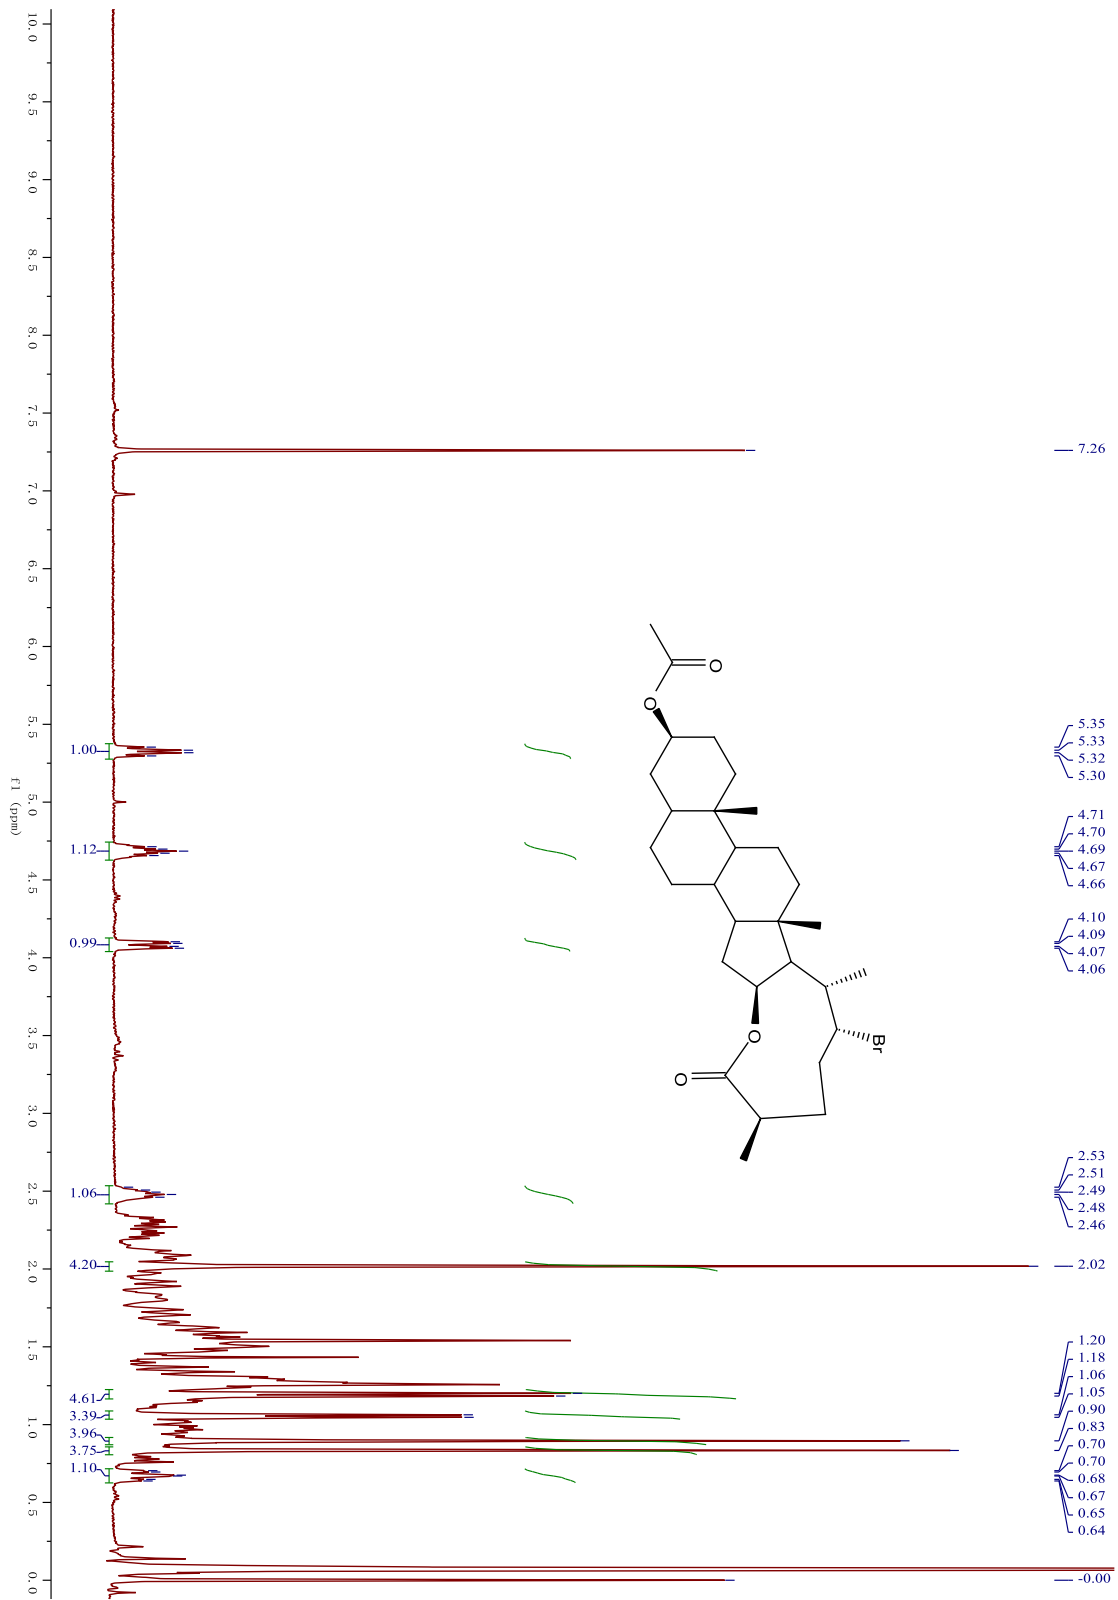

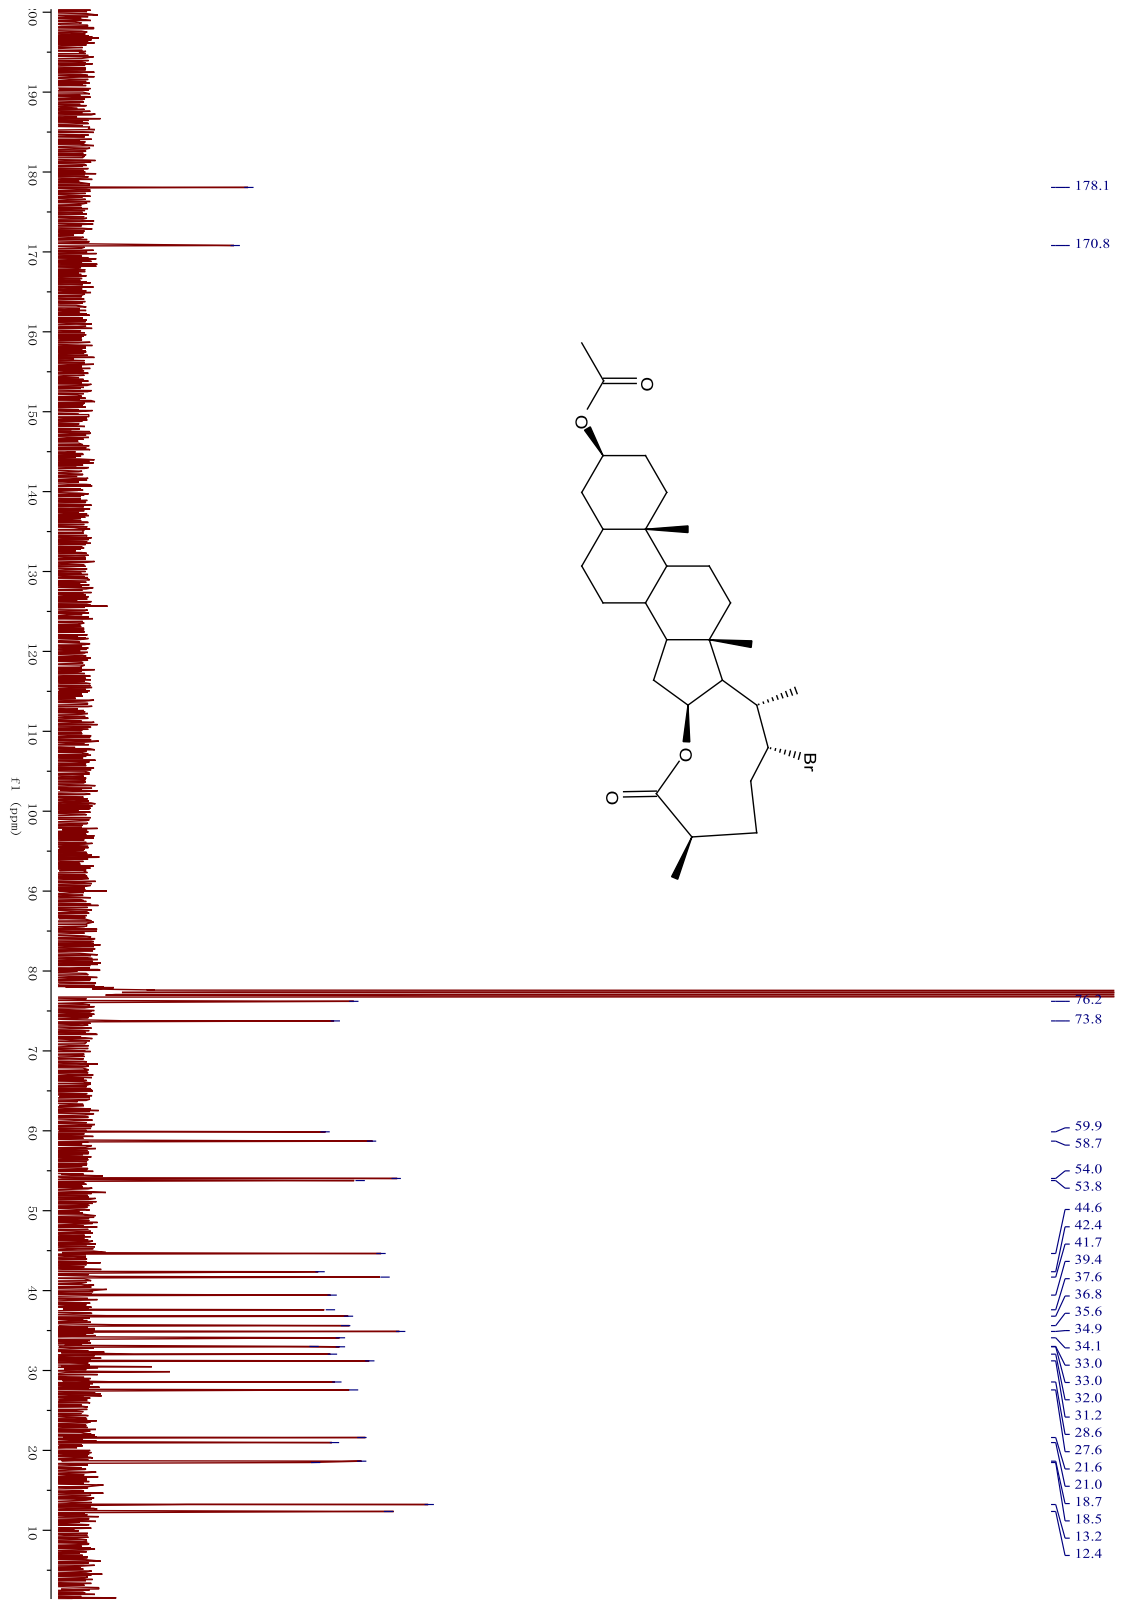



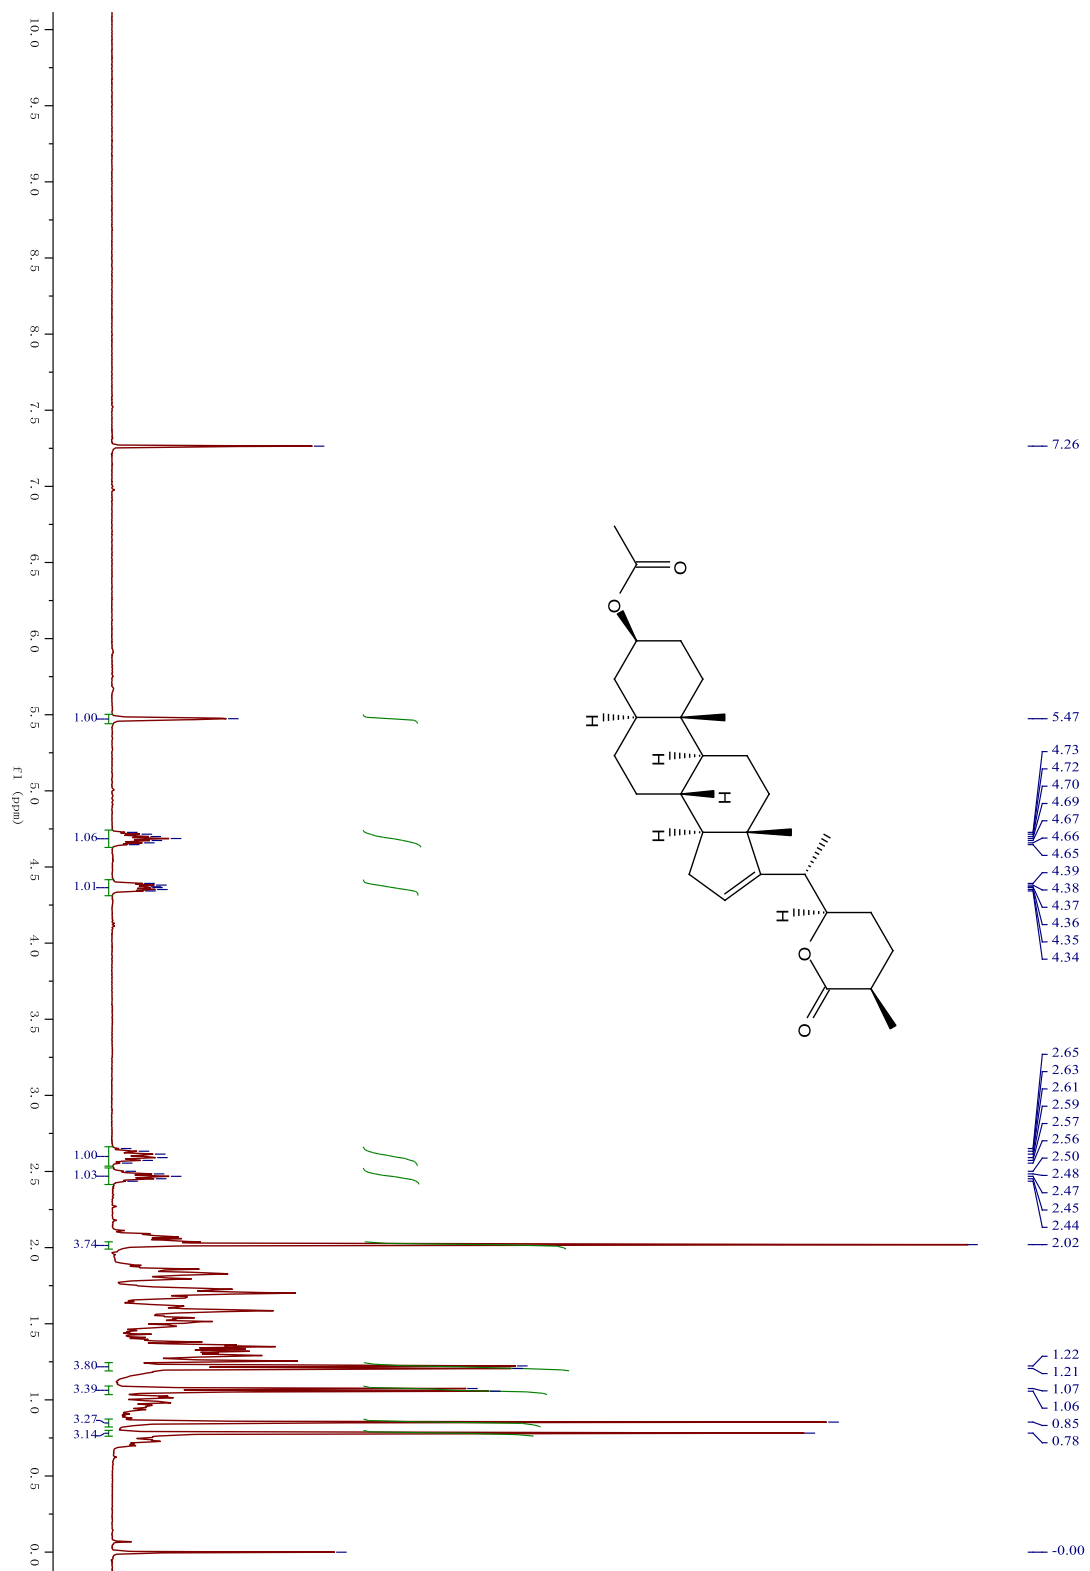

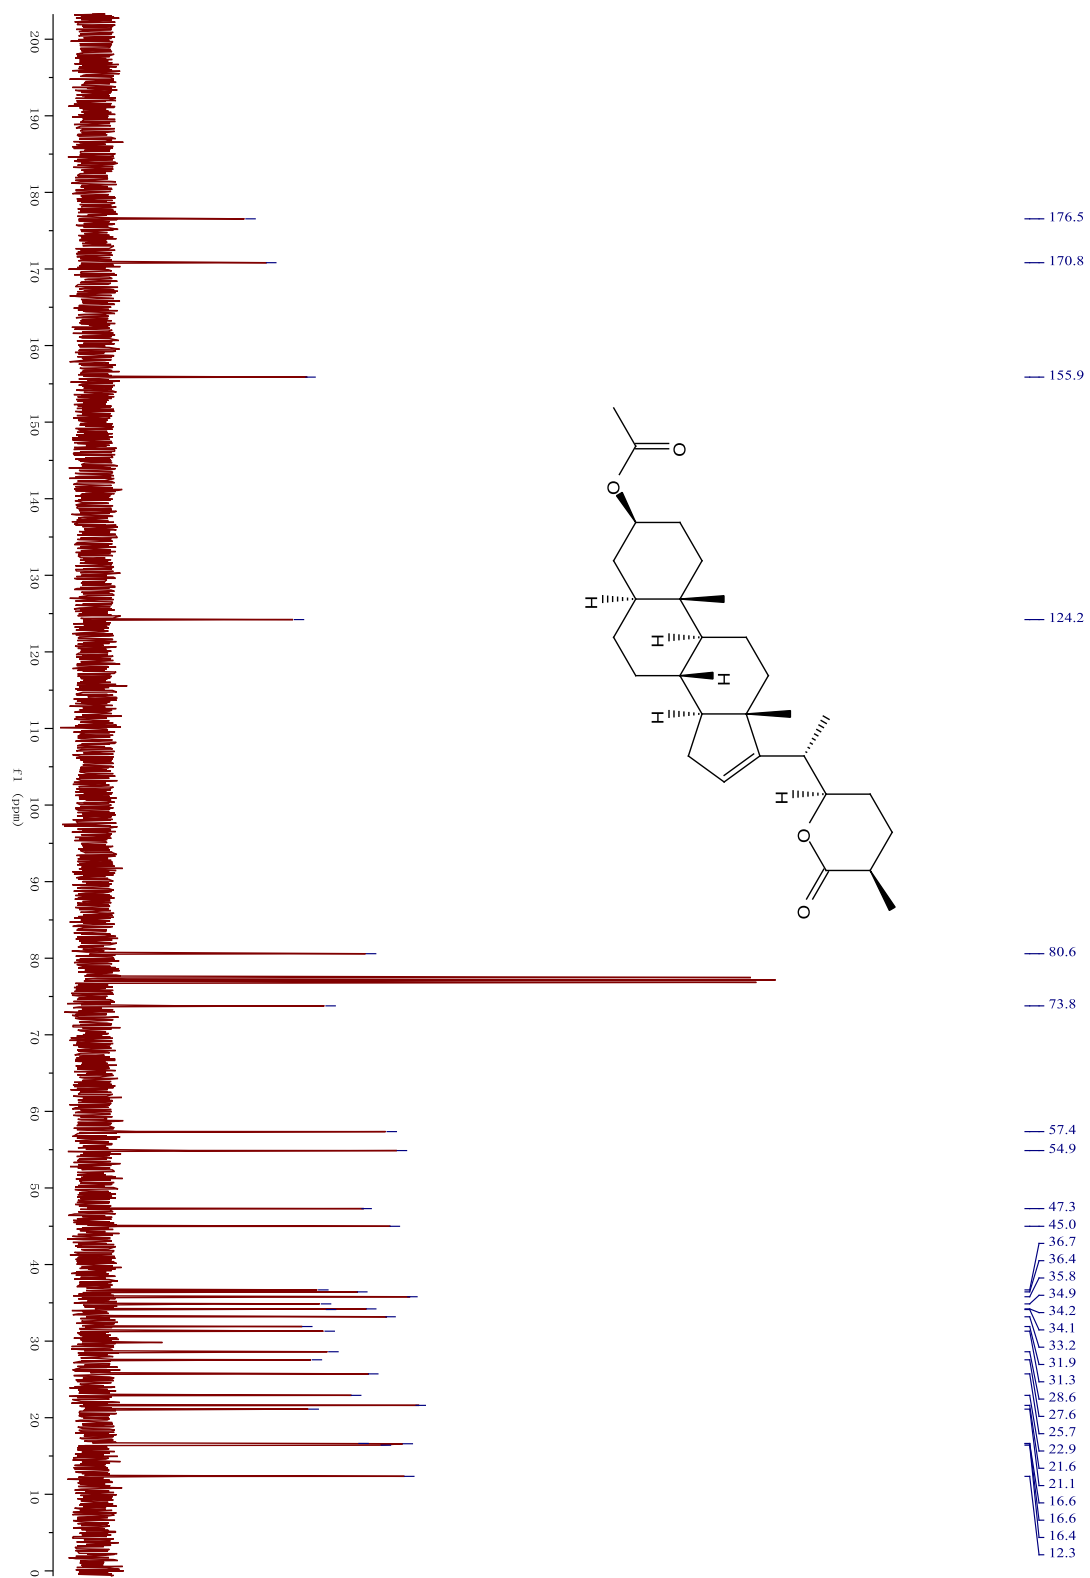

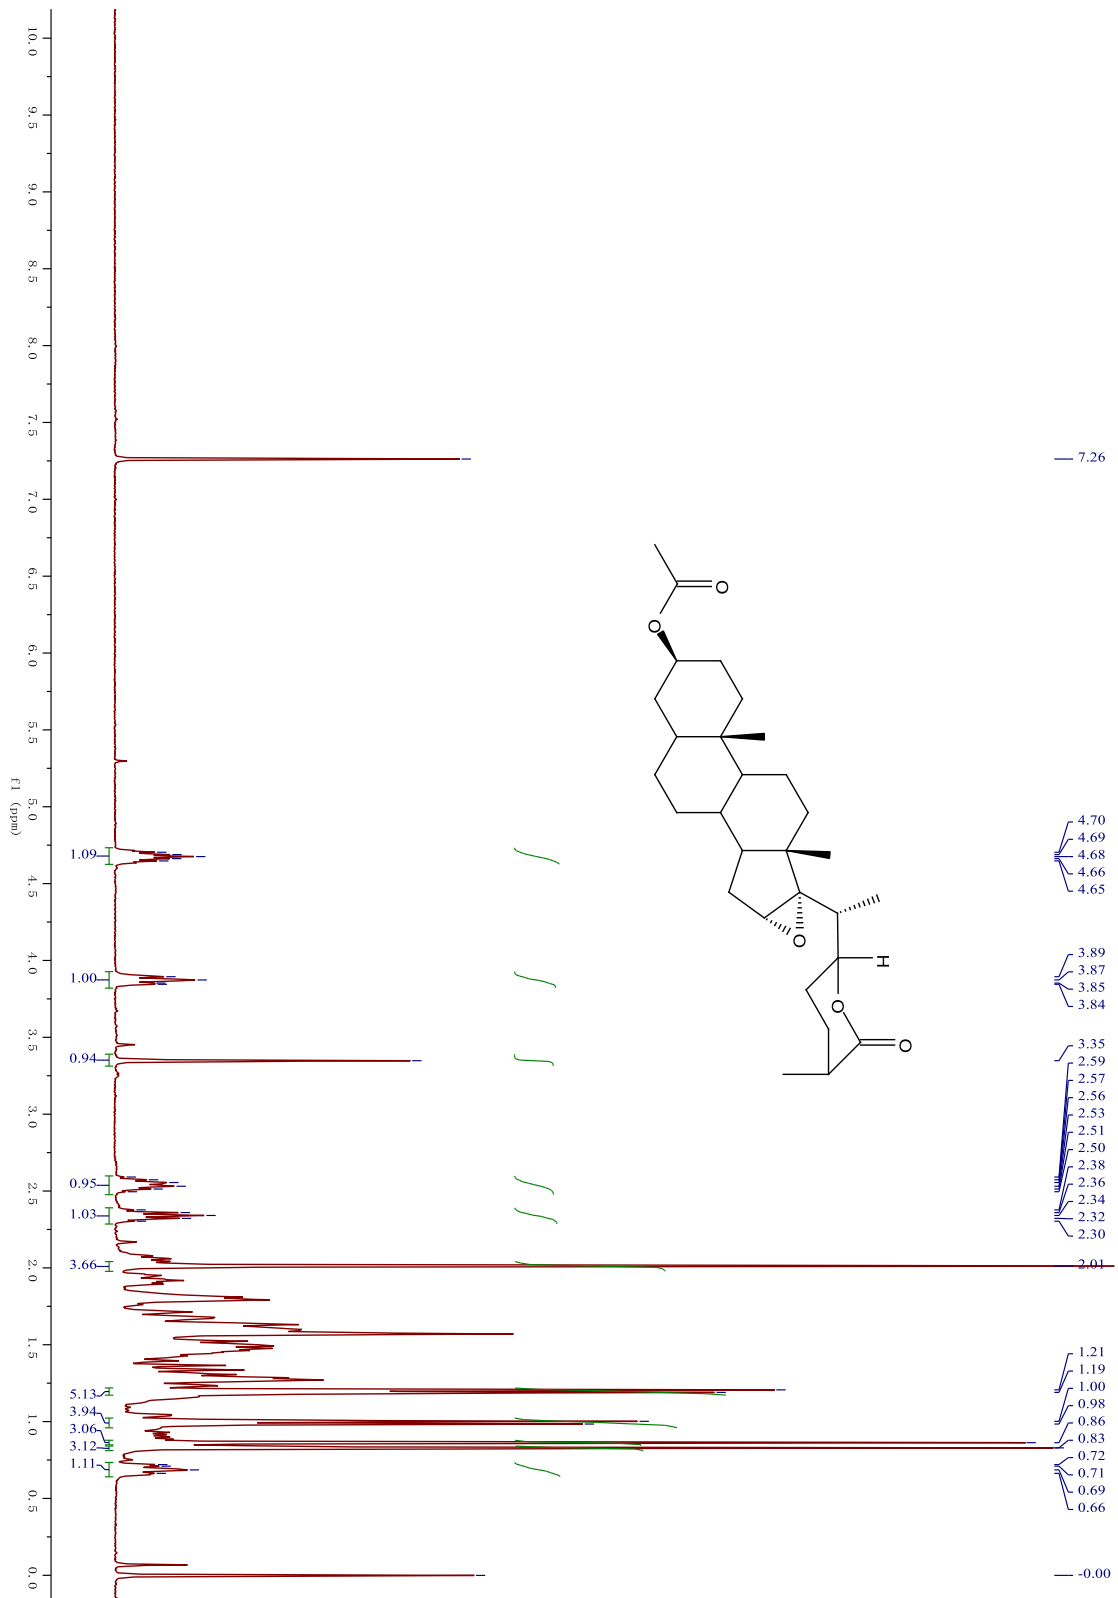

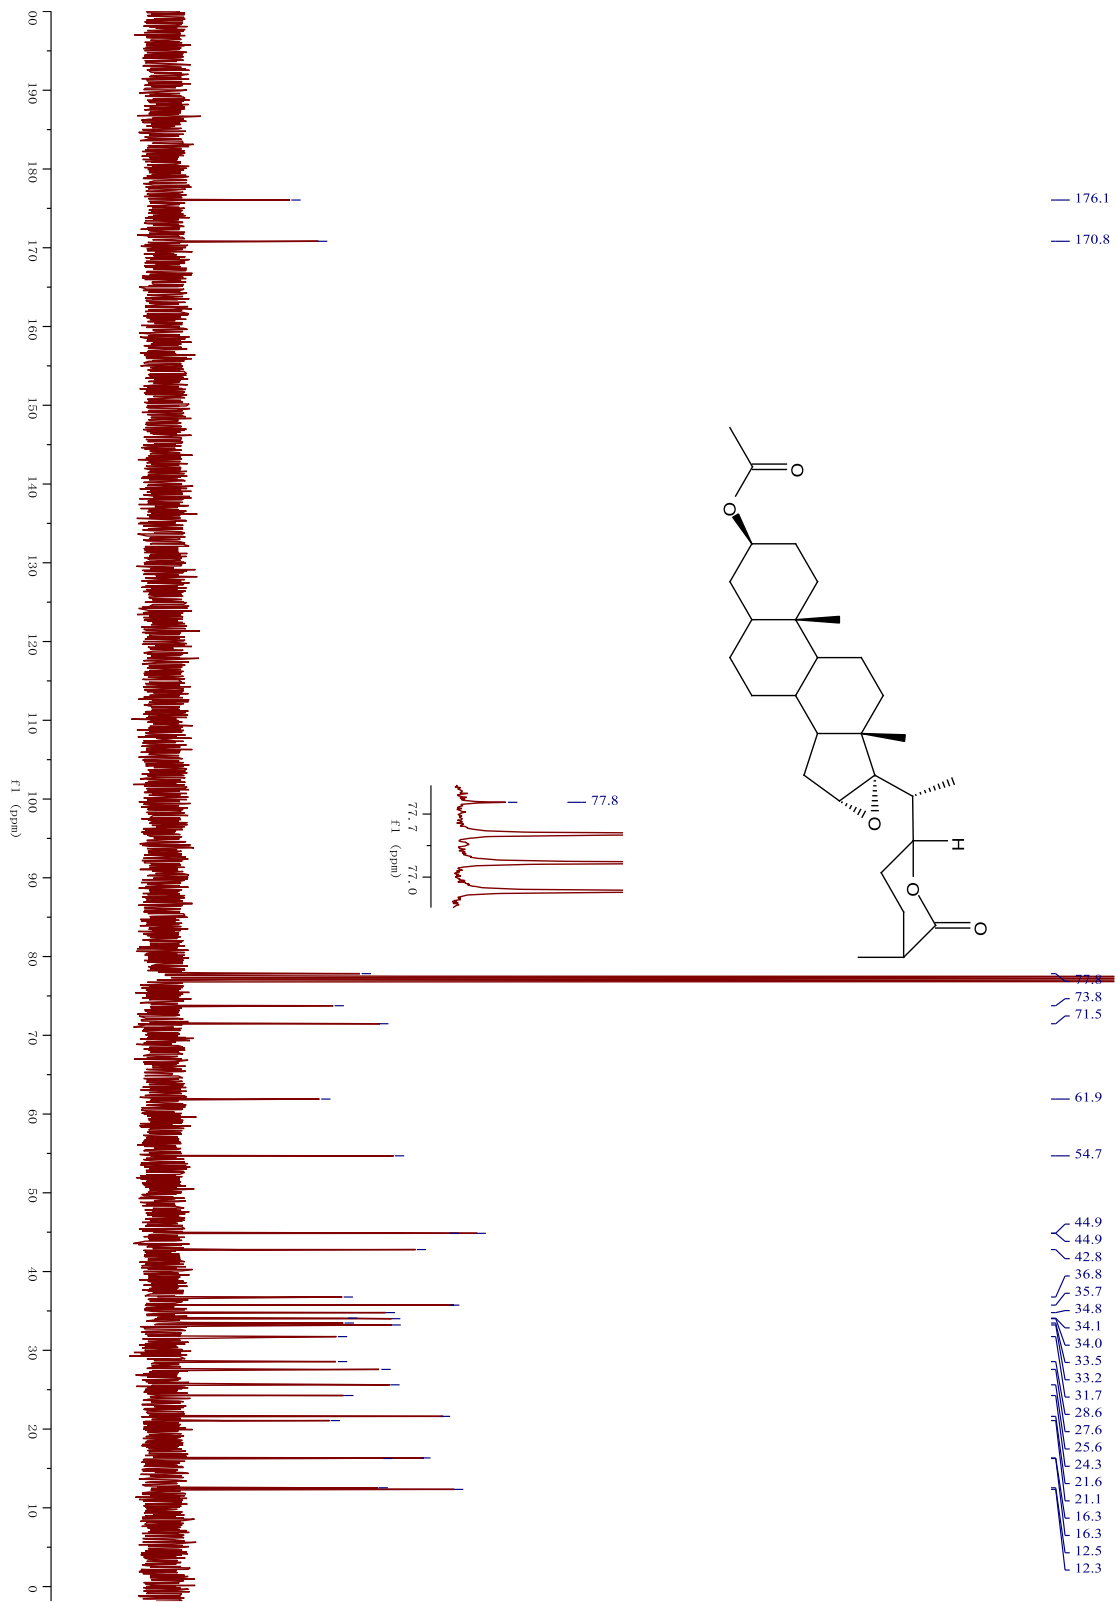

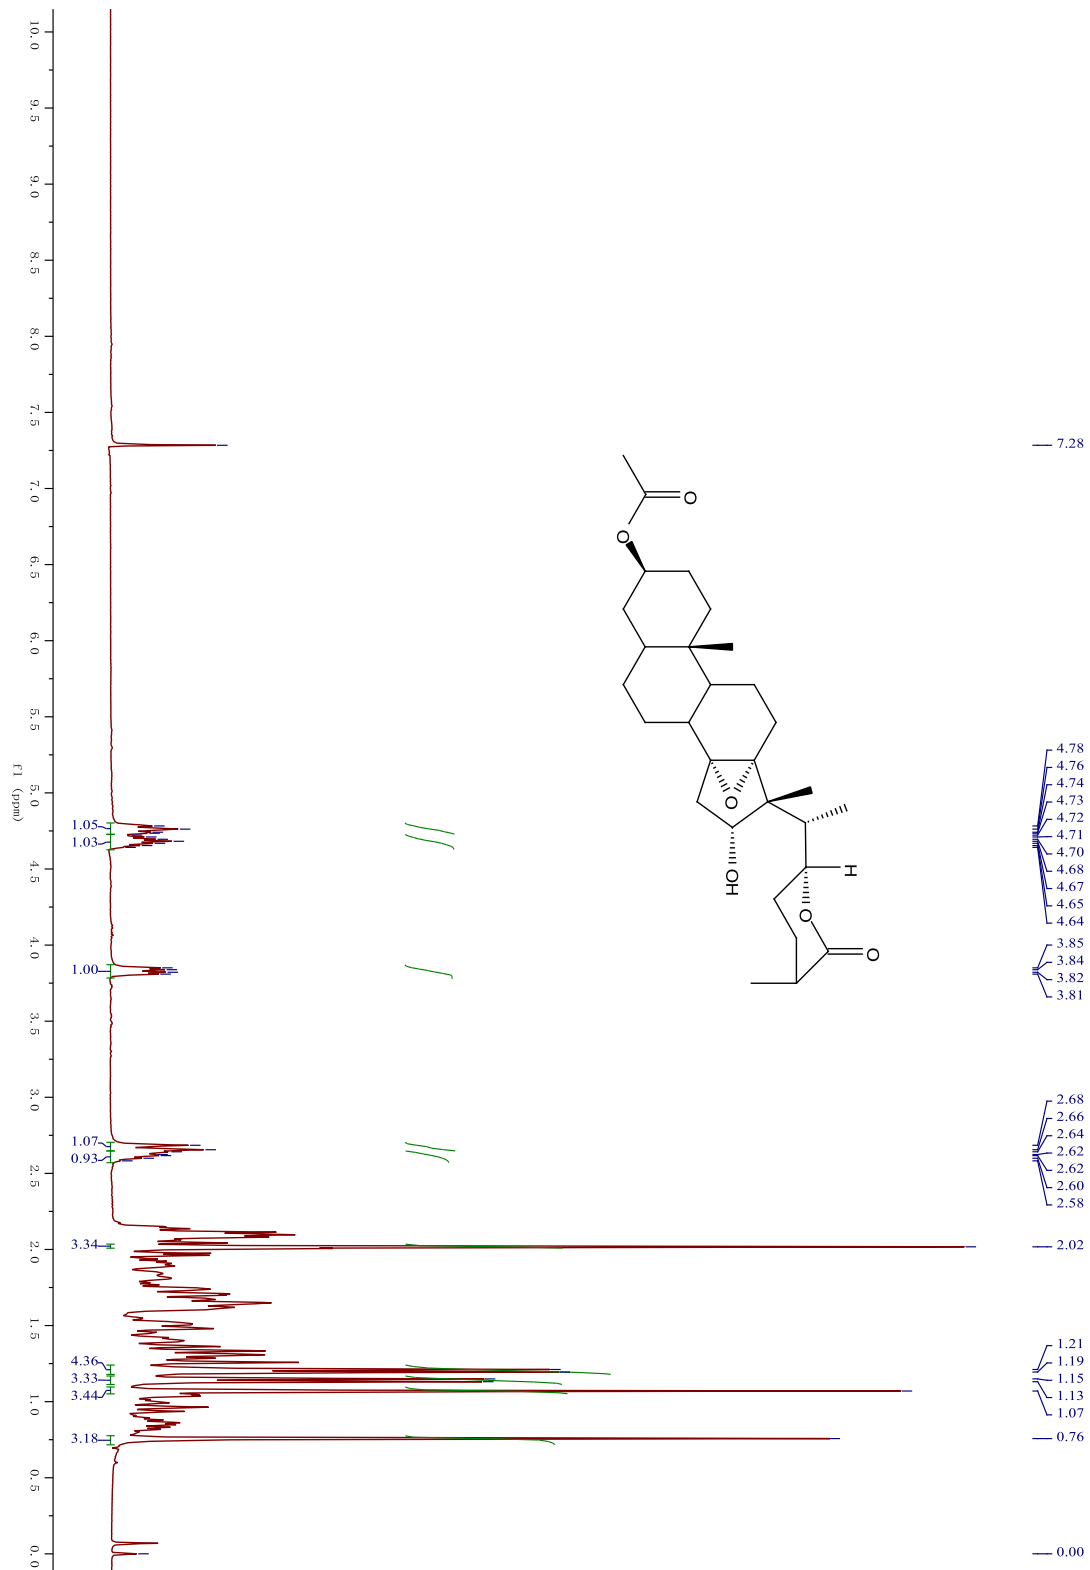

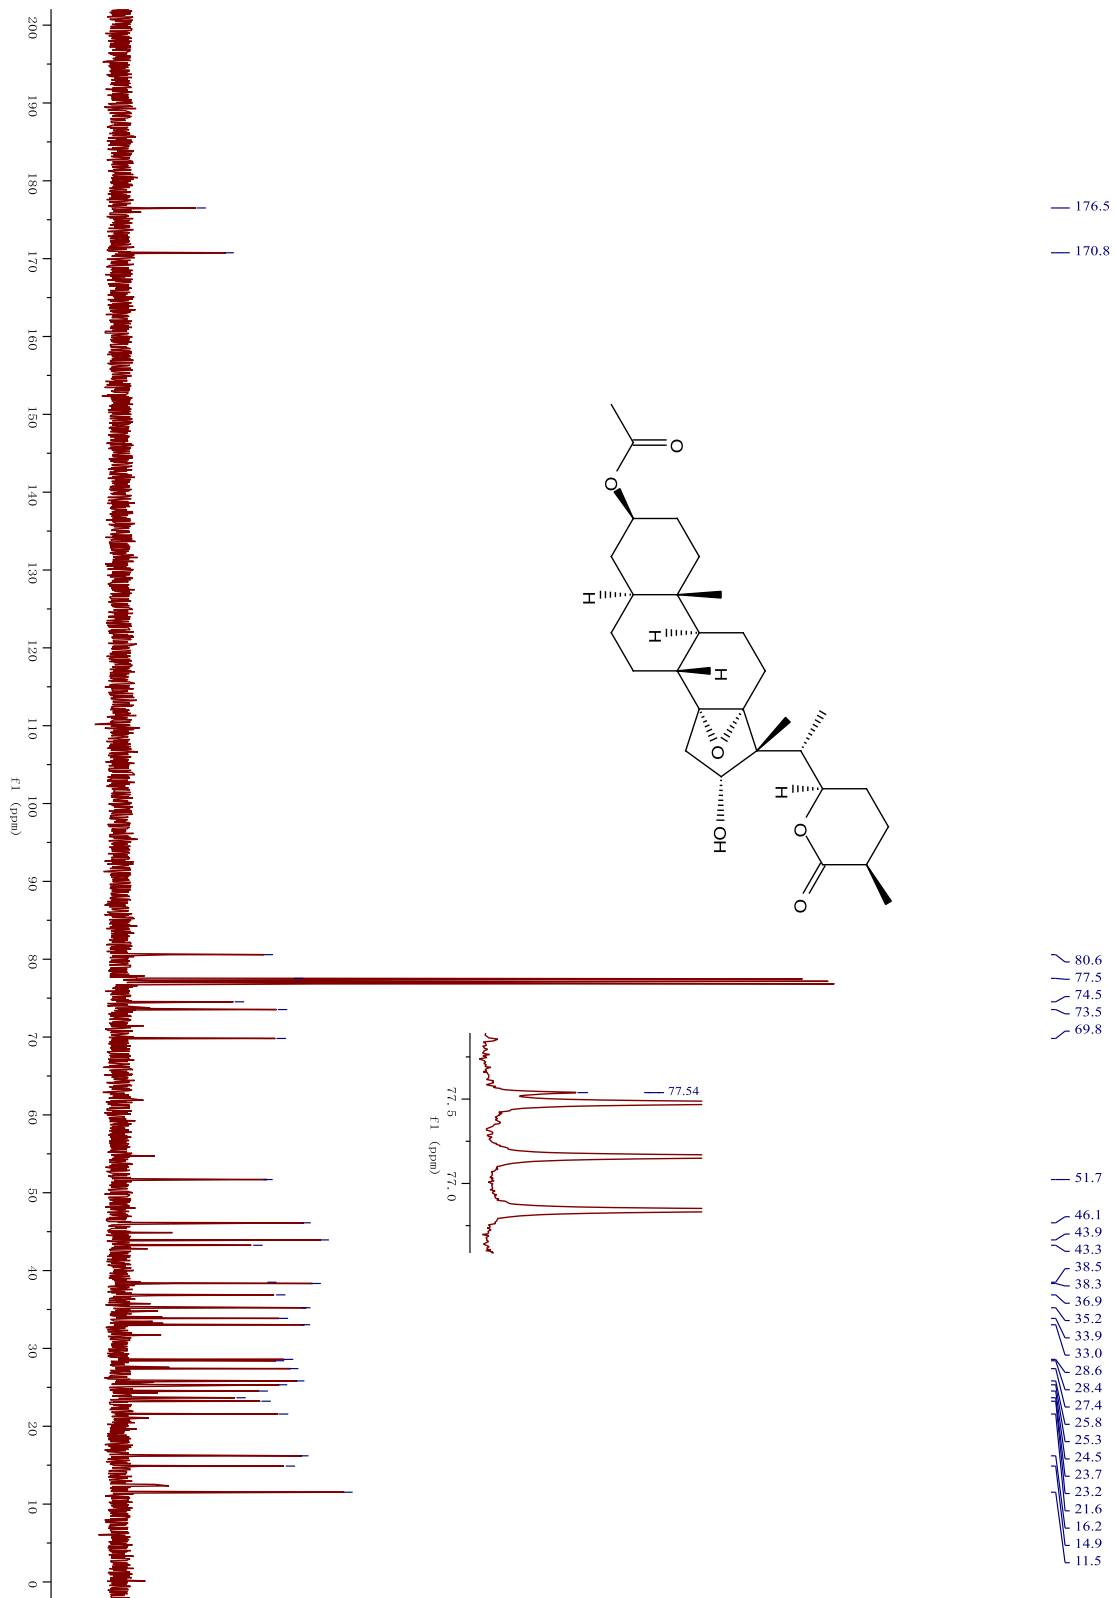

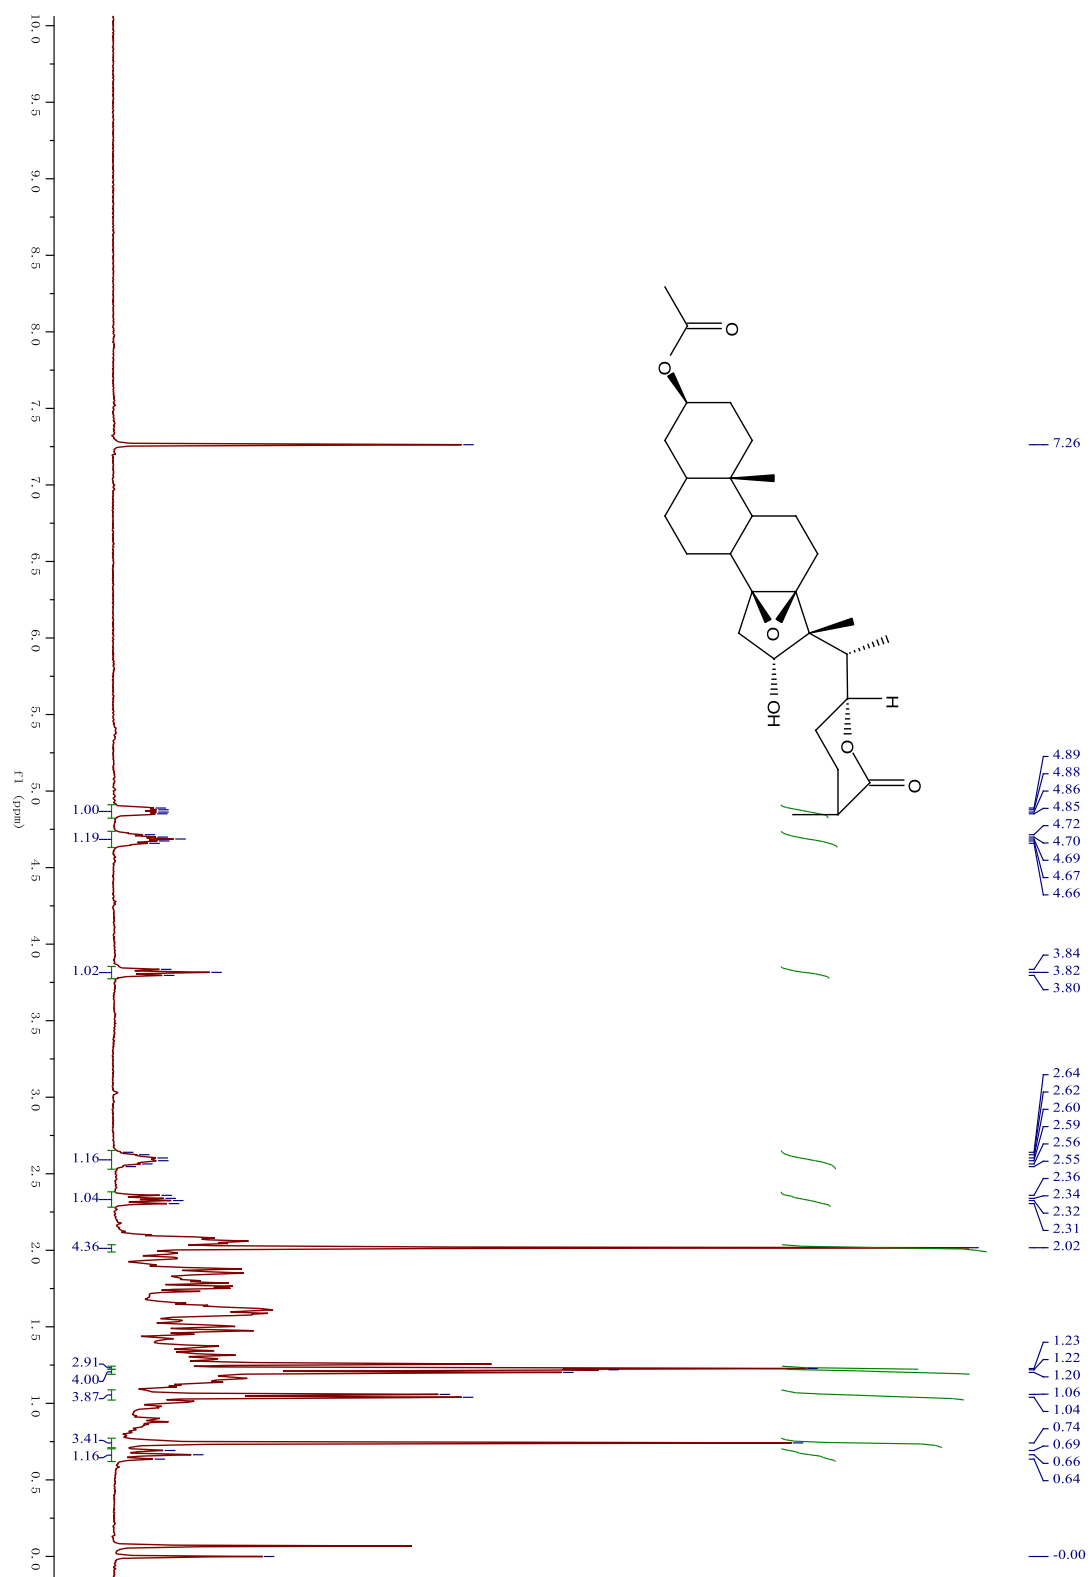

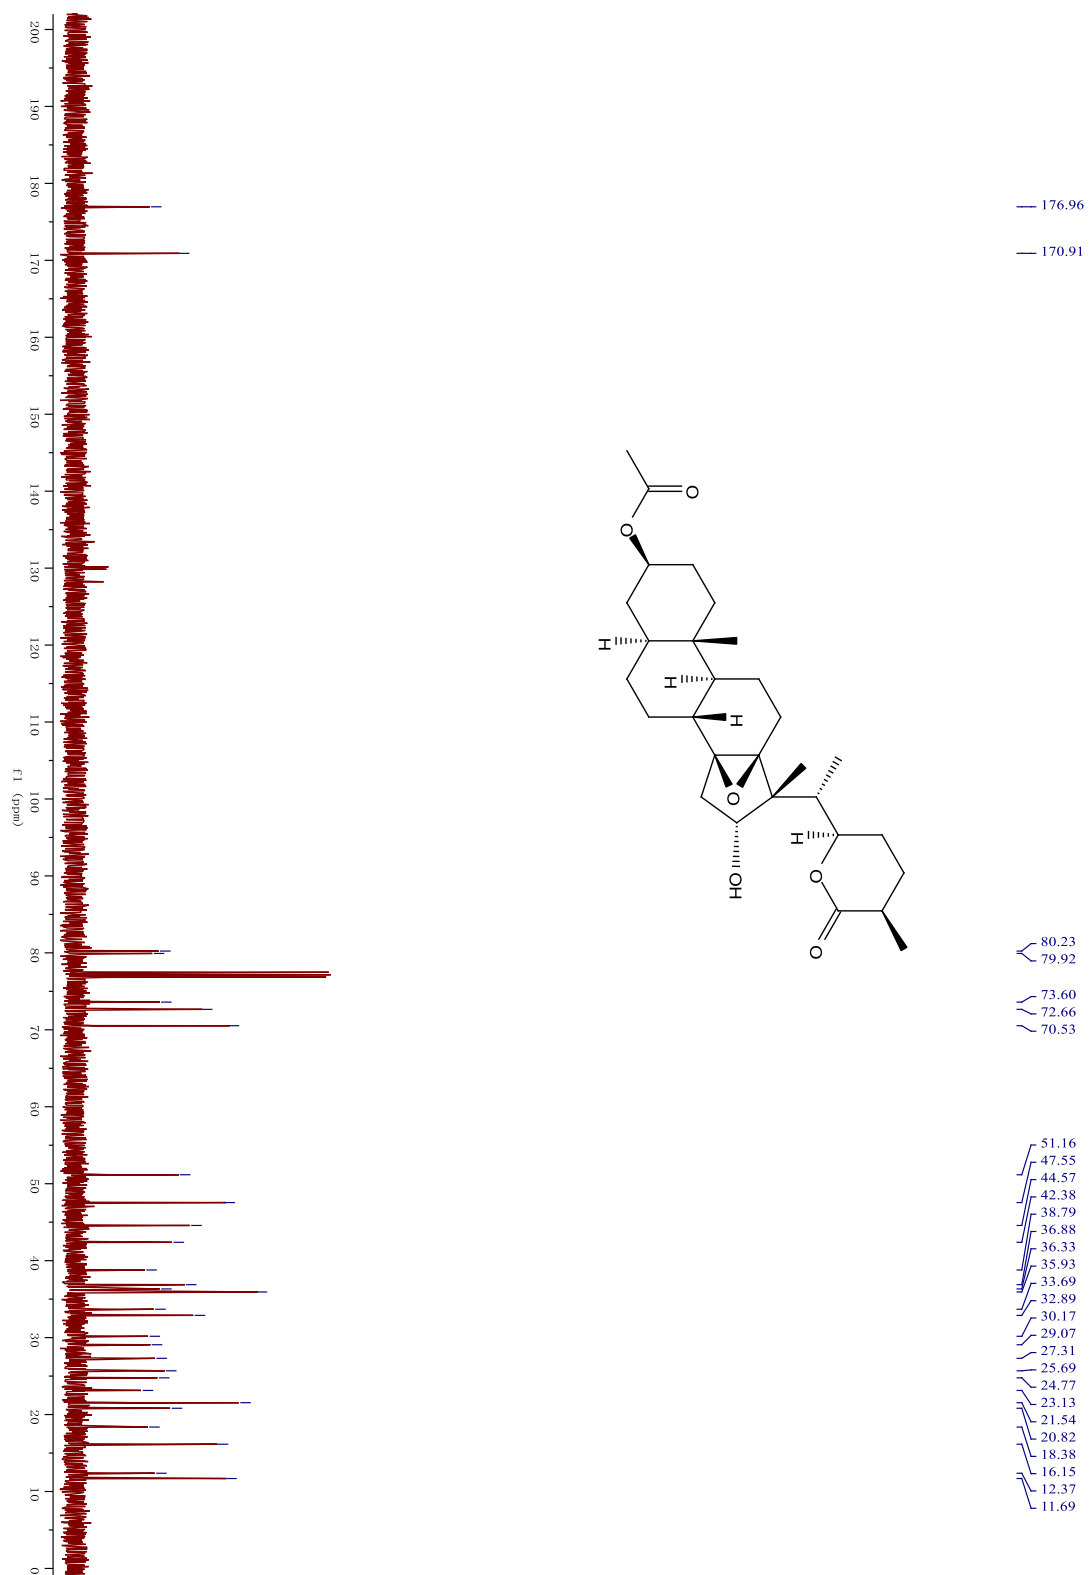



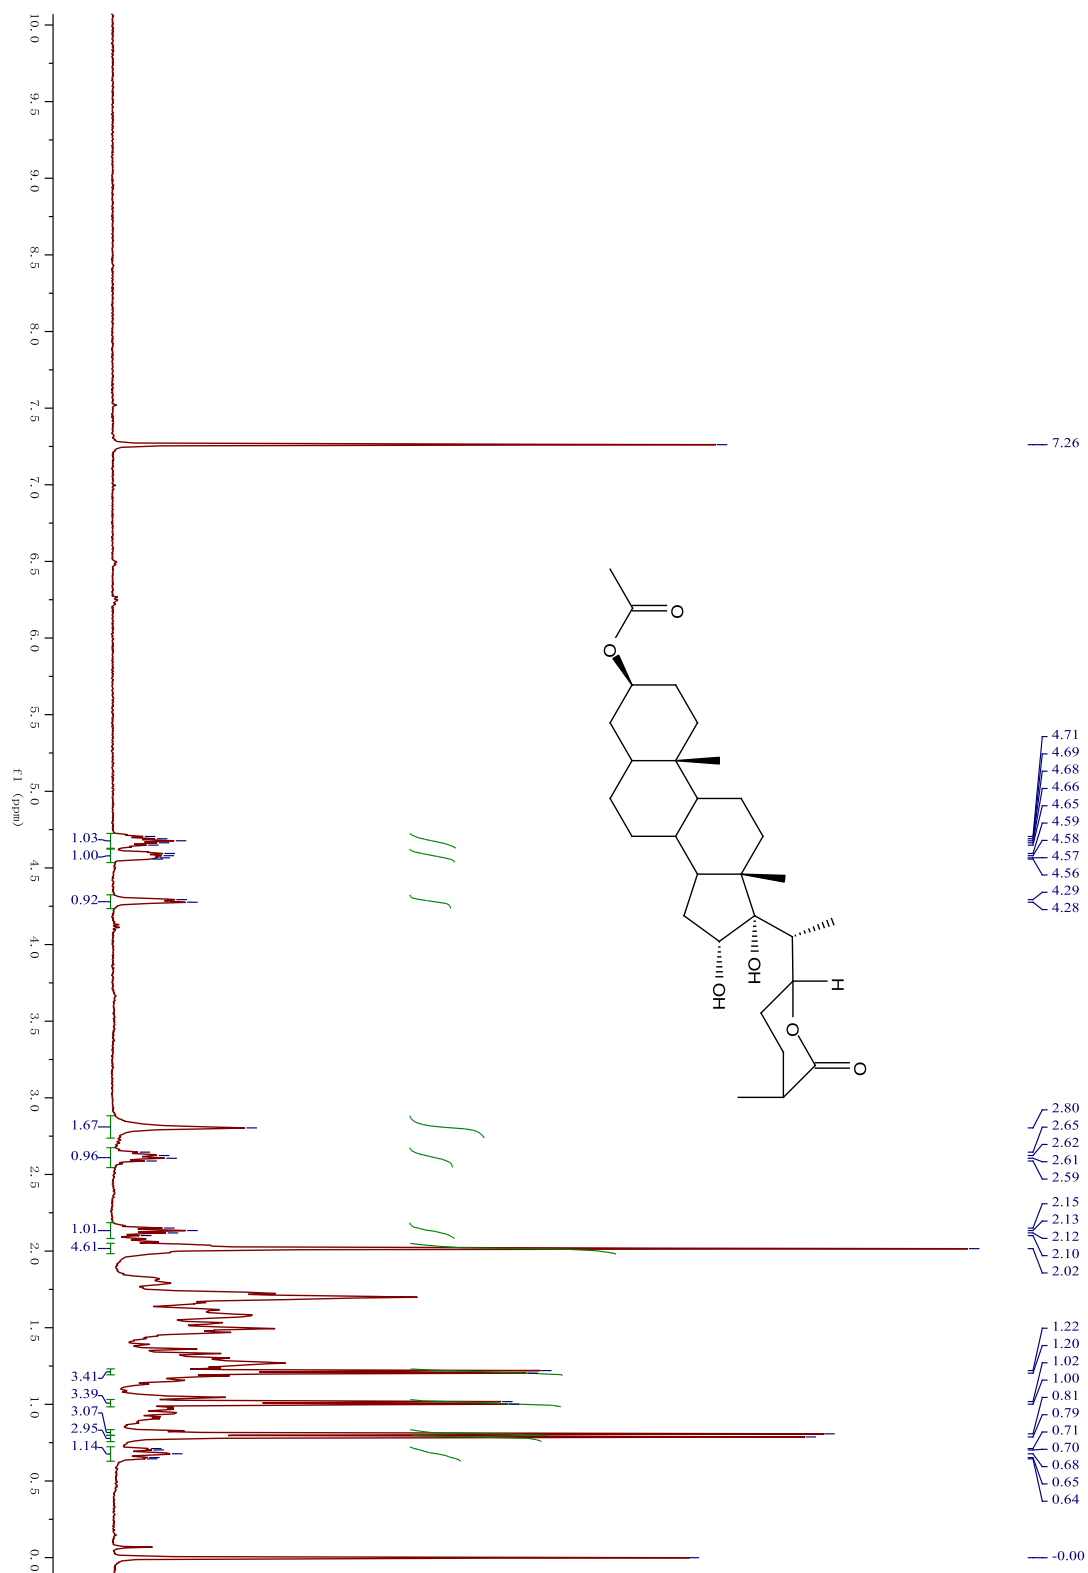

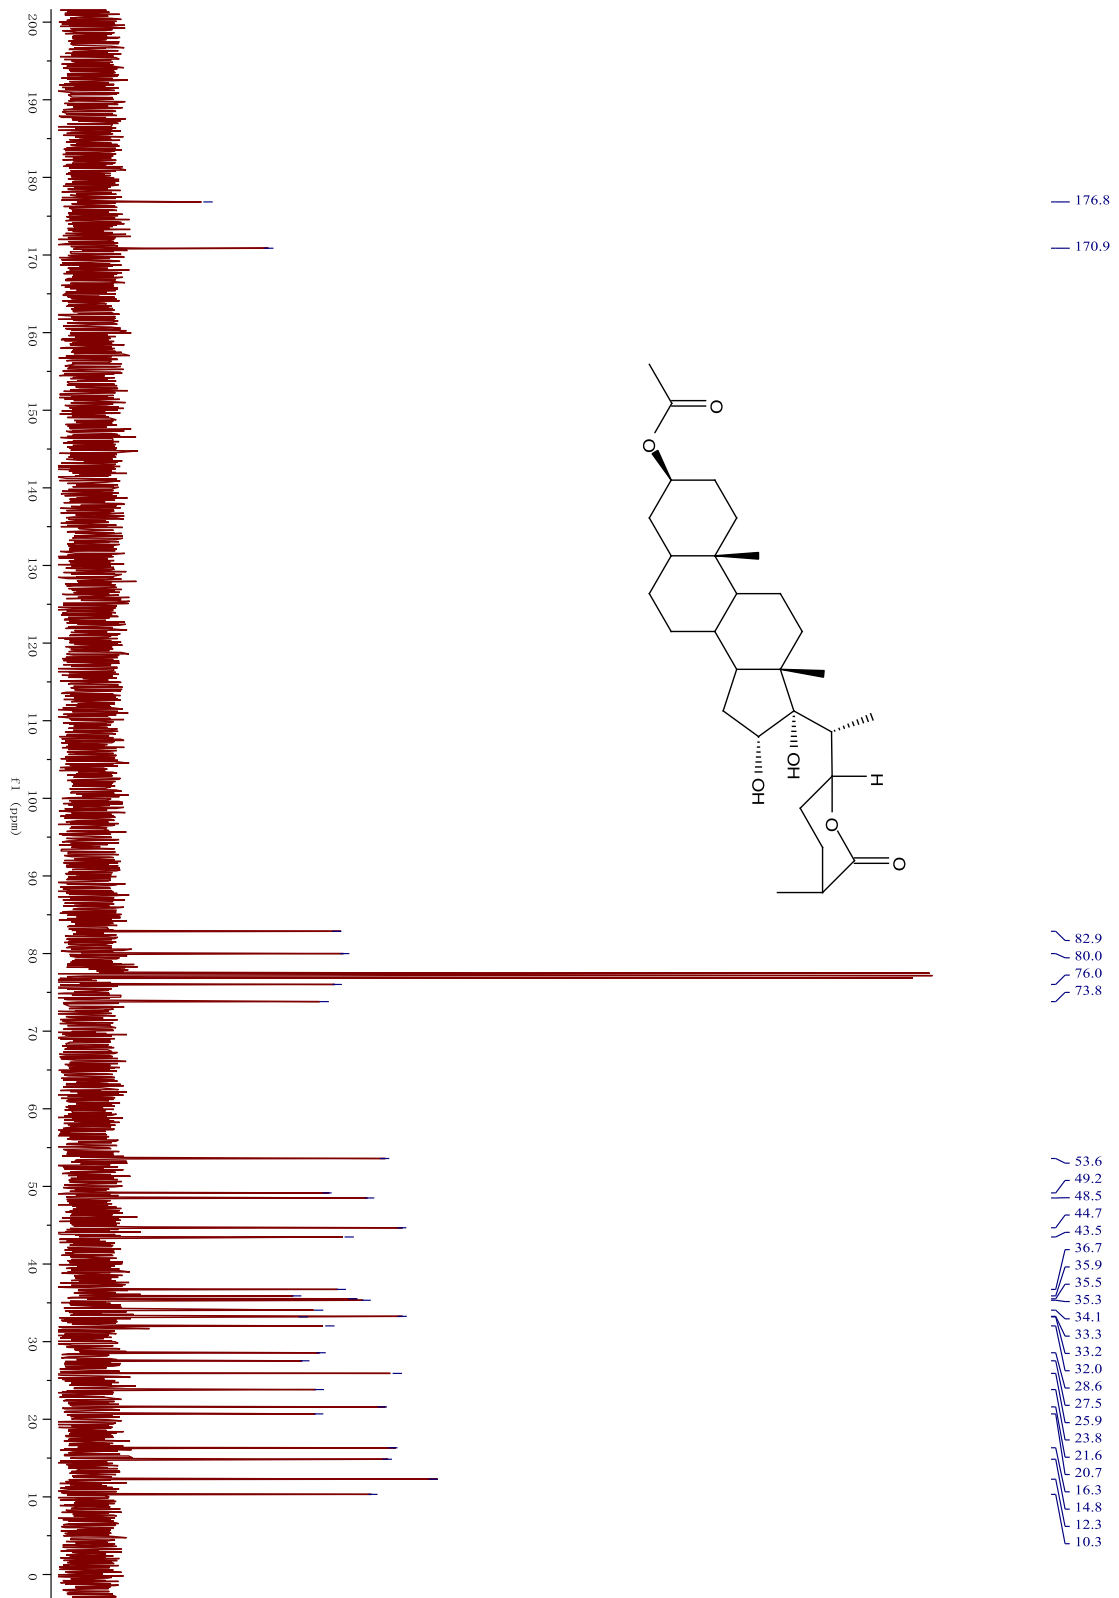

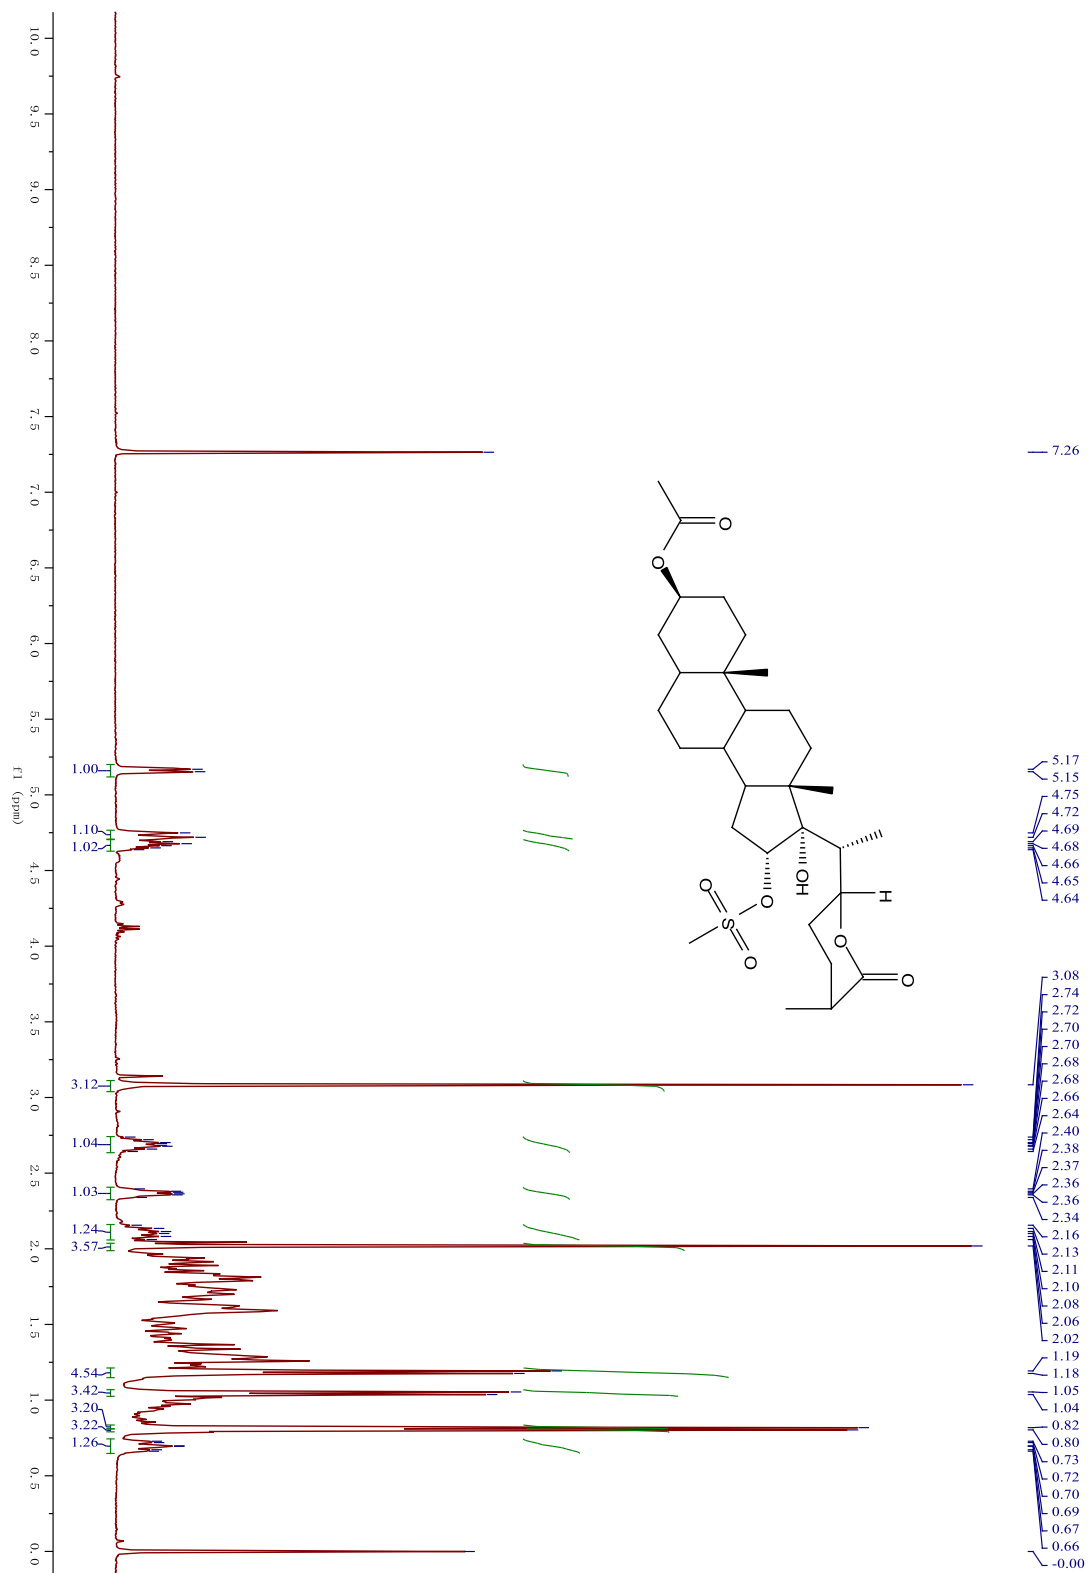

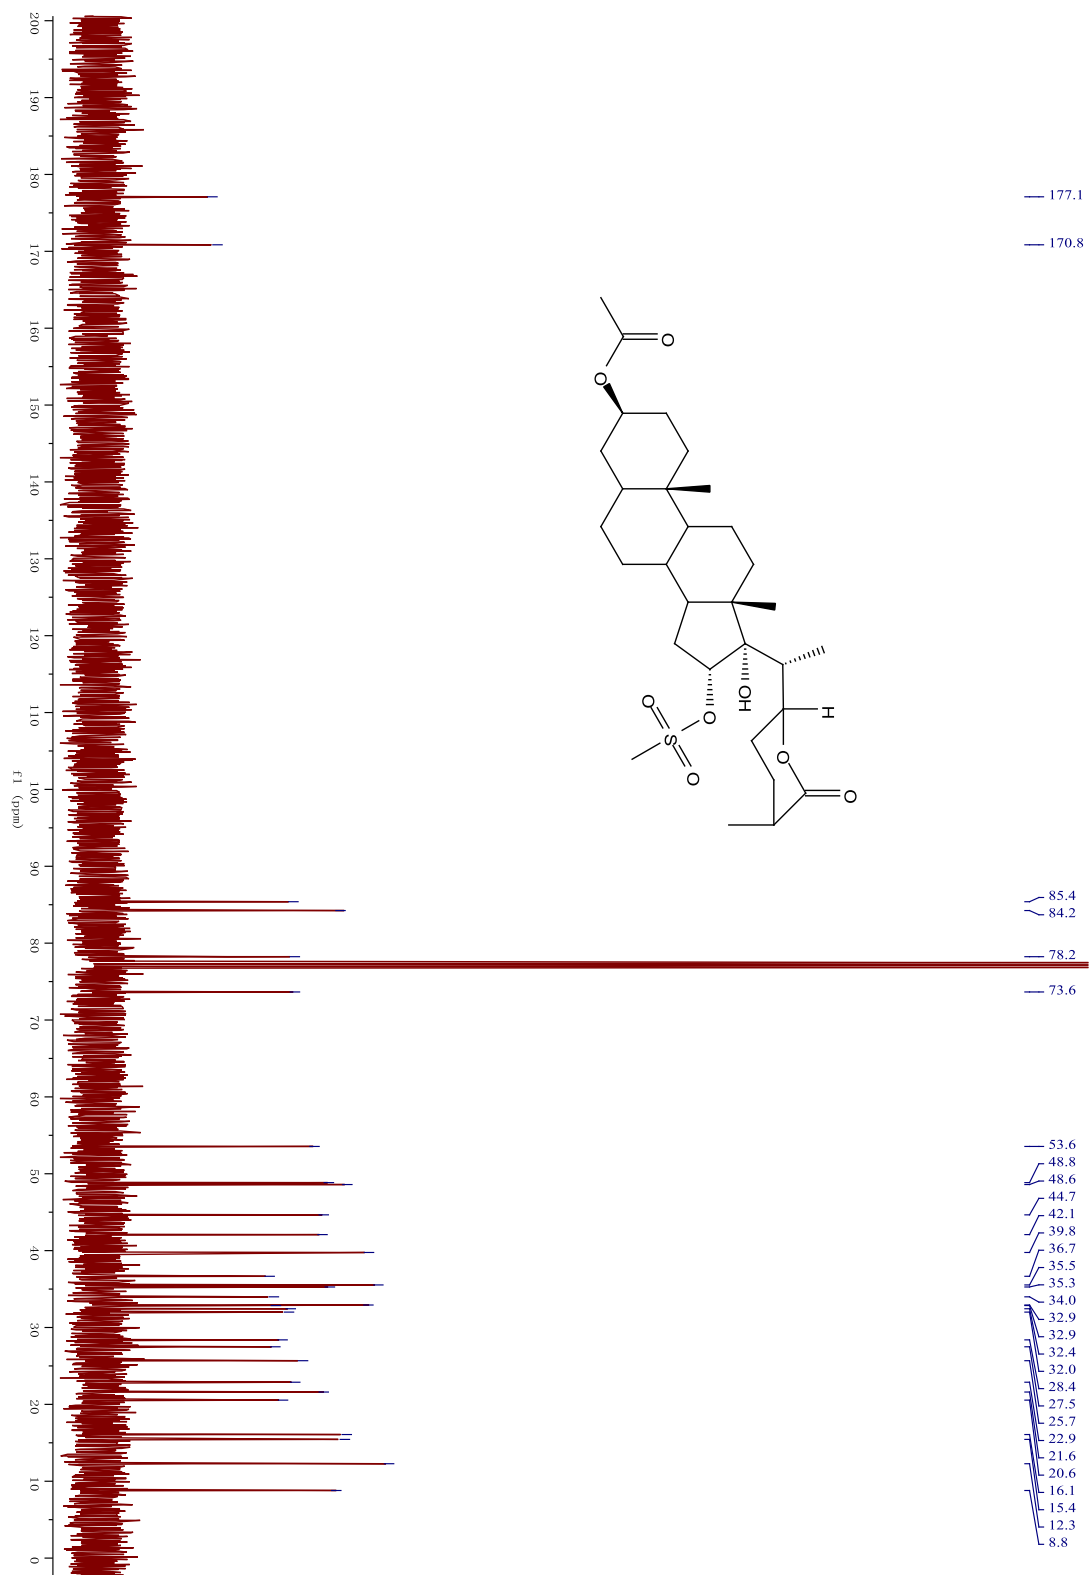

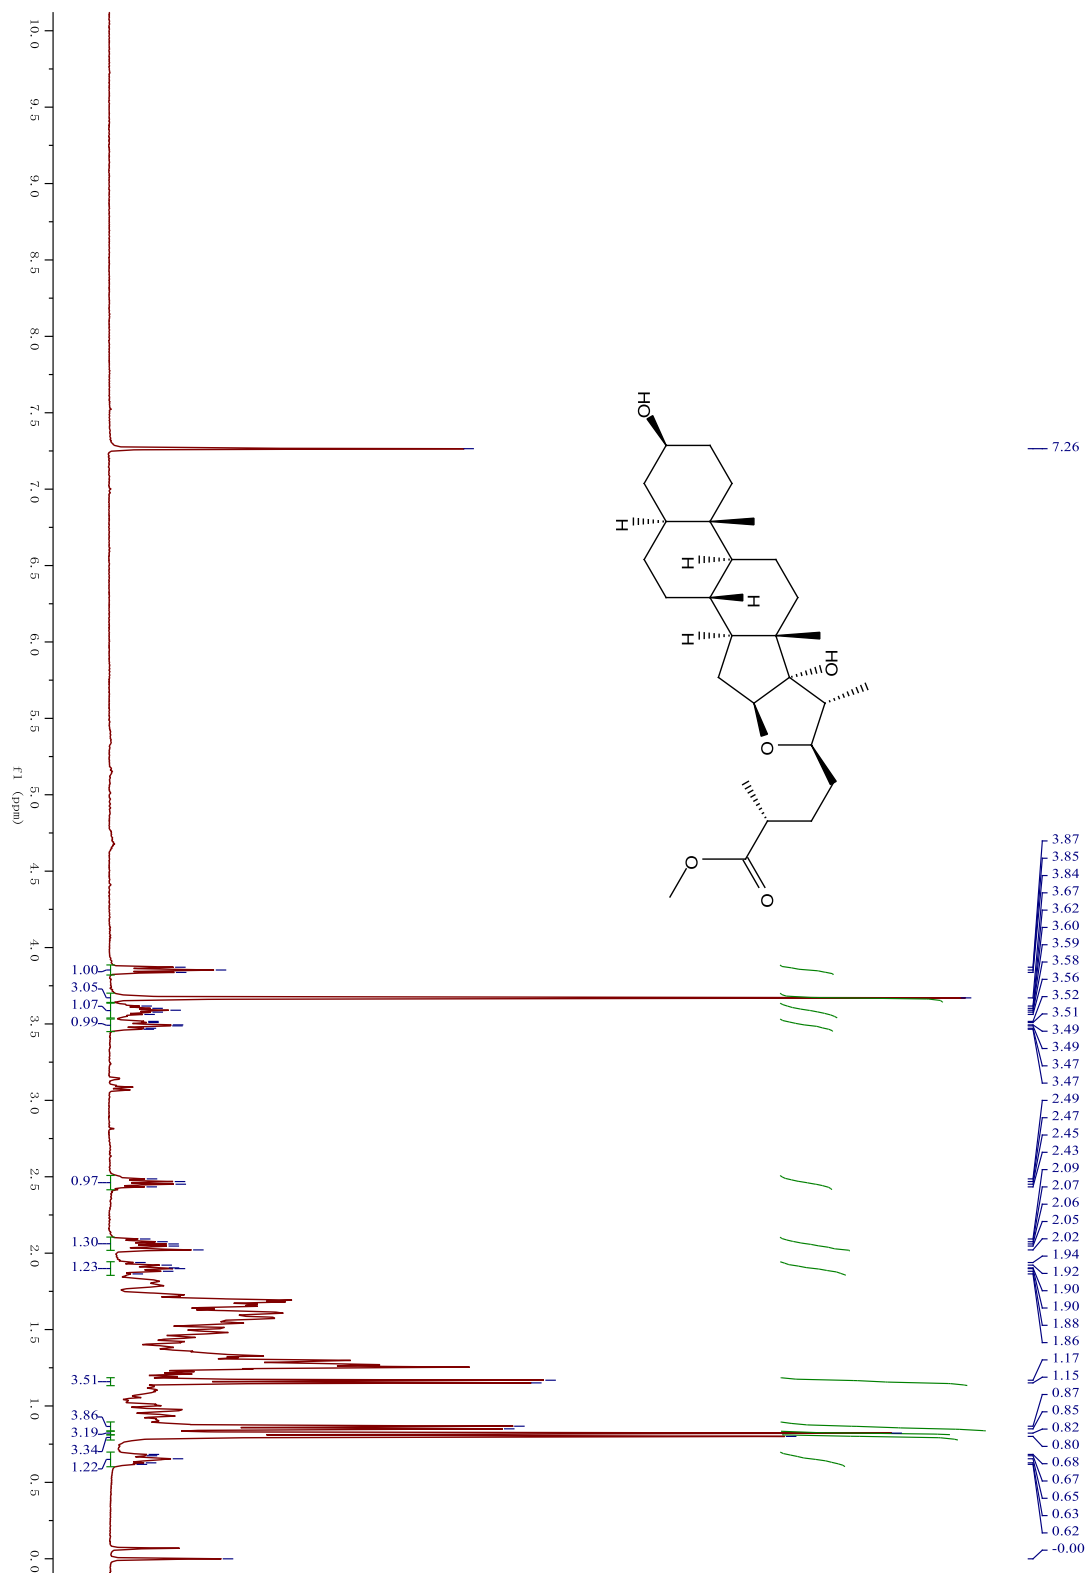

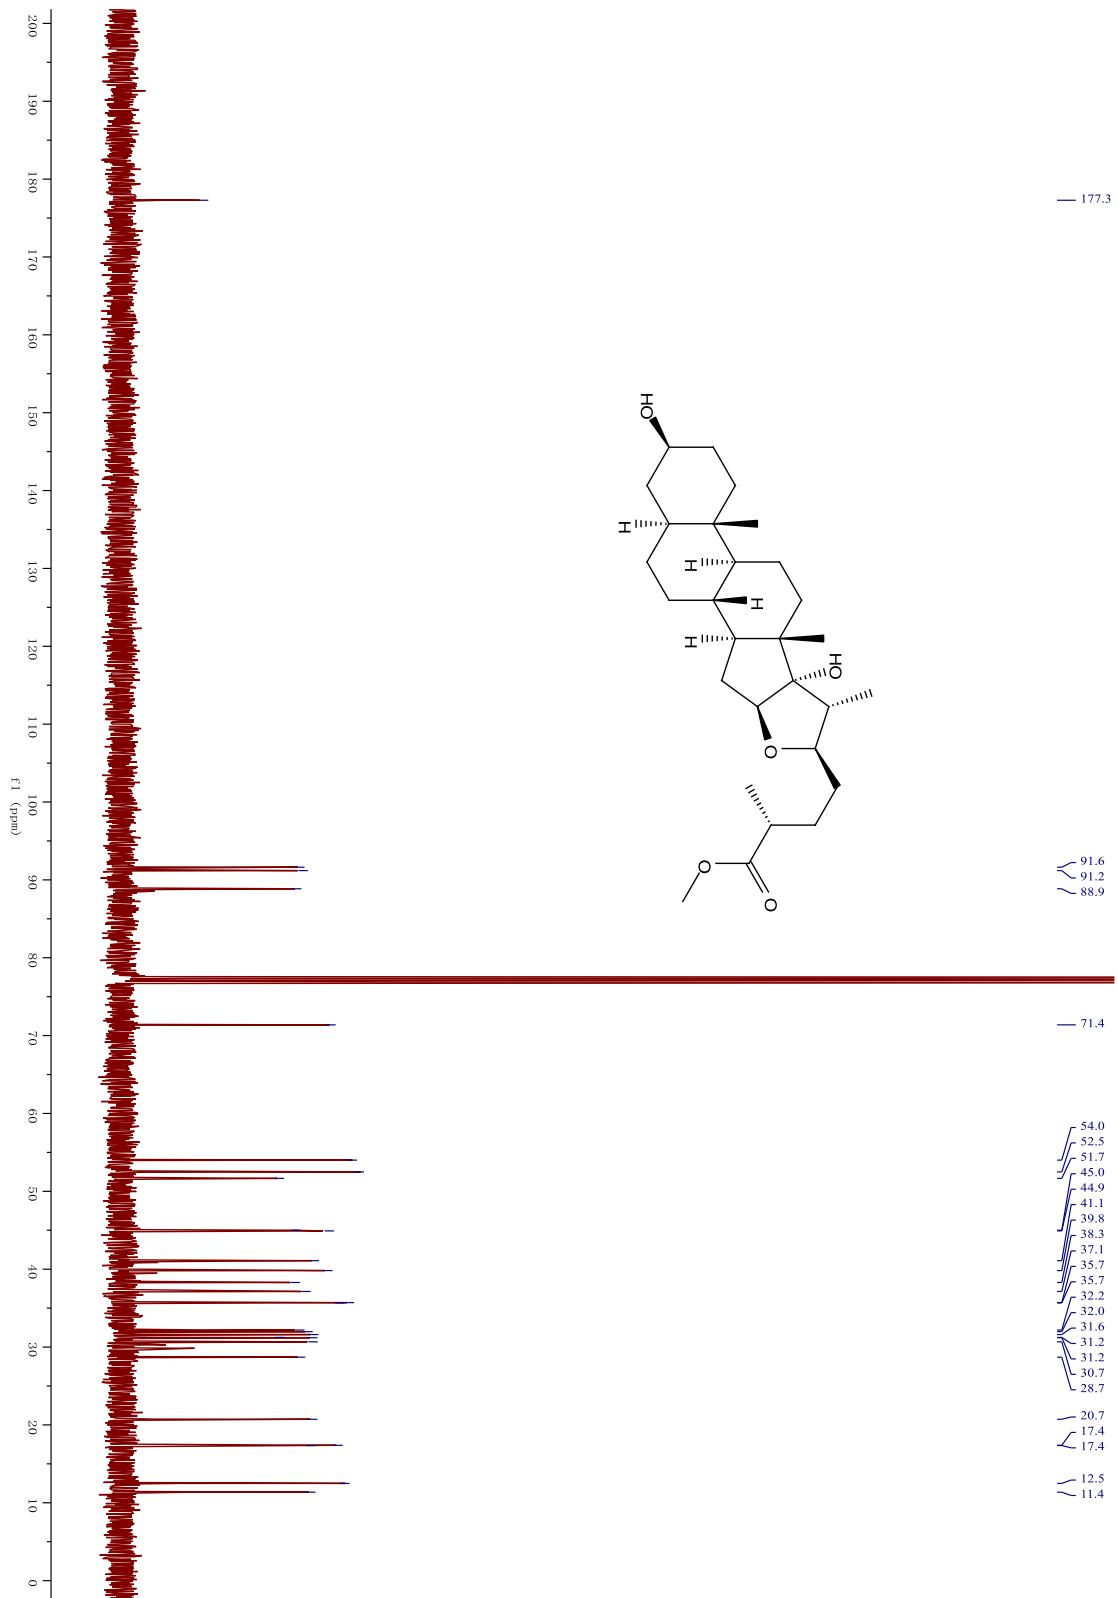

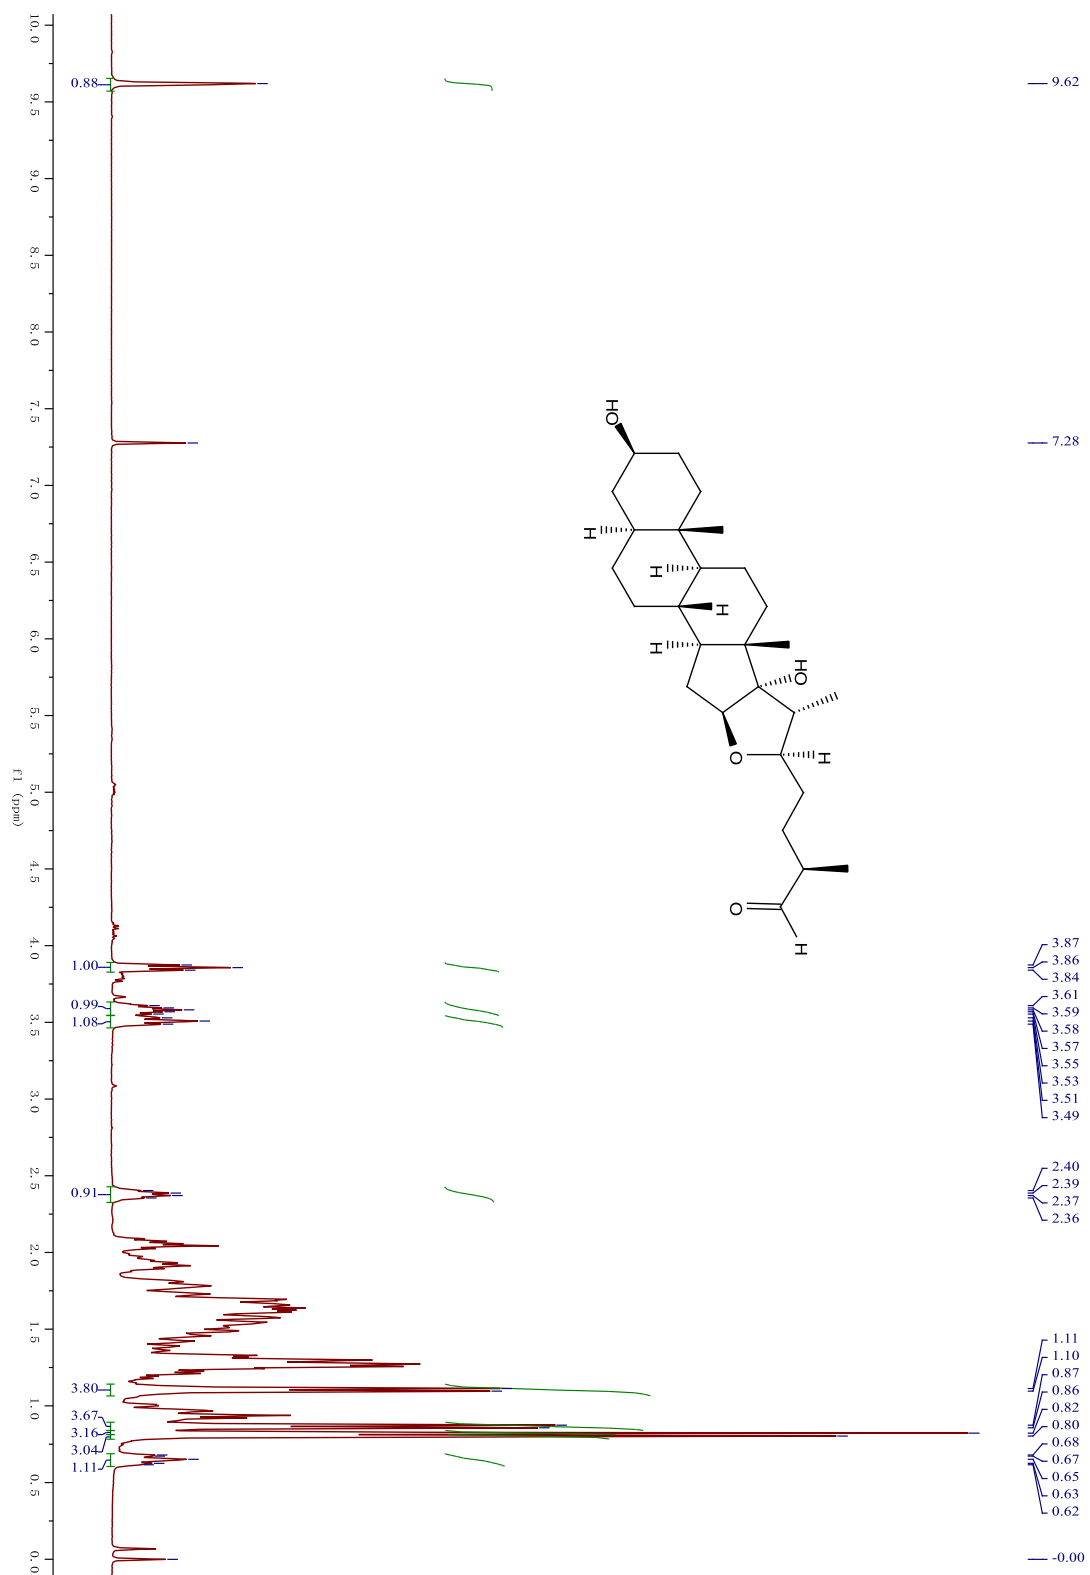

220  
210  
200  
190  
180  
170  
160  
150  
140  
130  
120  
110  
100  
90  
80  
70  
60  
50  
40  
30  
20  
10  
0

Fl (ppm)

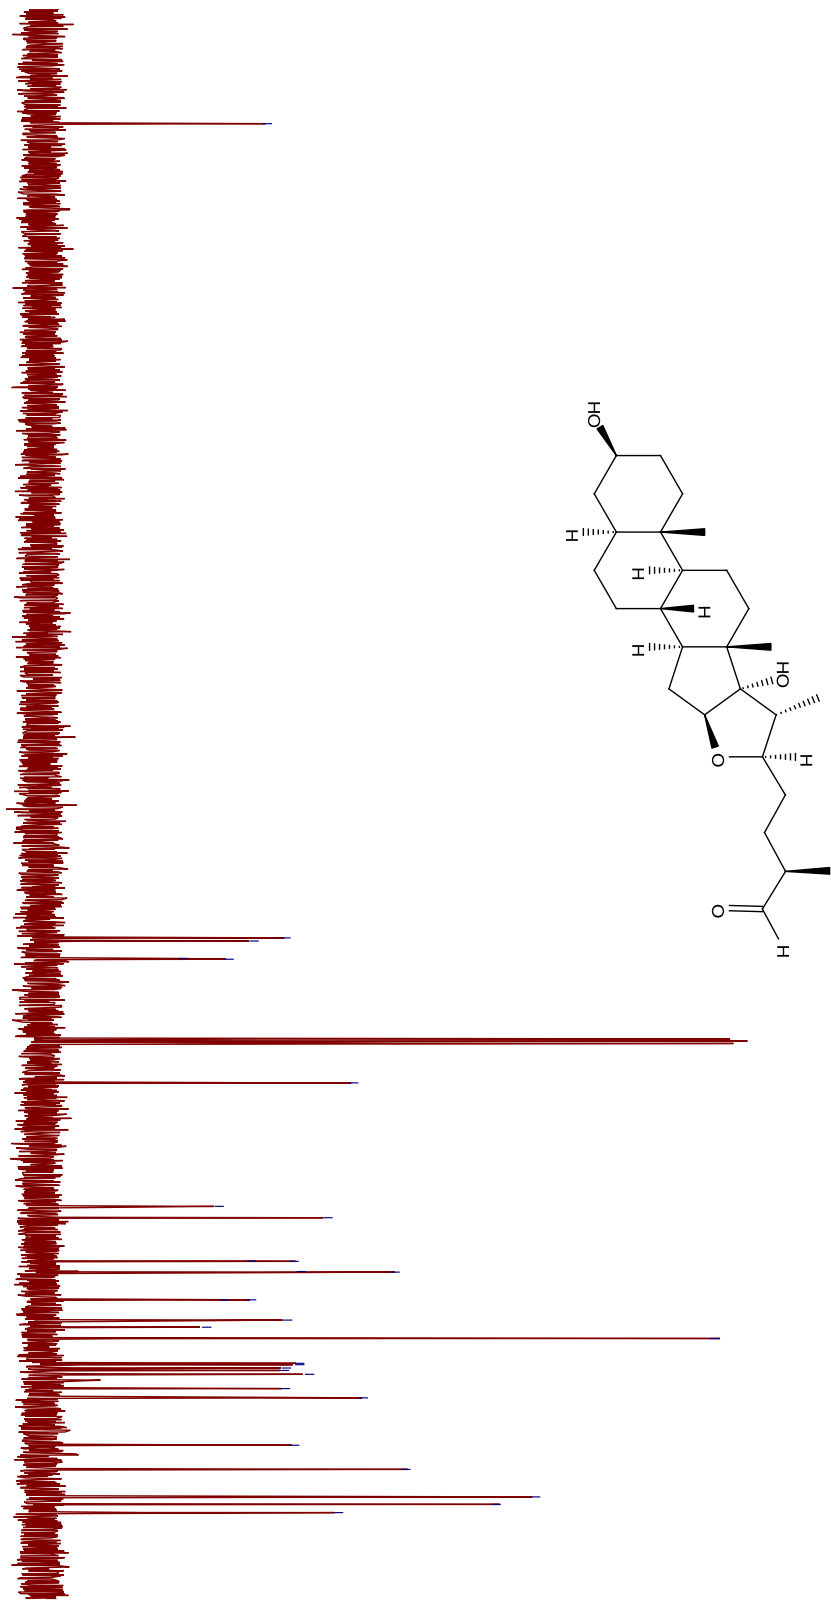

— 205.3

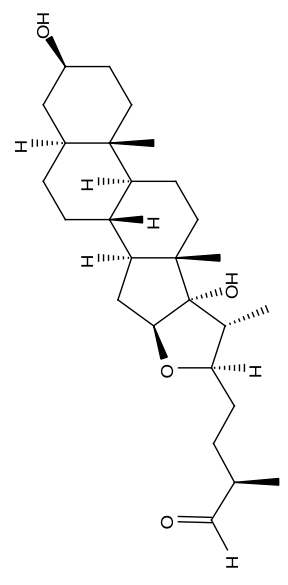

91.6  
91.2  
88.7  
88.6

— 71.3

54.1  
52.5  
46.4  
46.4  
45.0  
44.9  
41.0  
41.0  
38.2  
37.2  
35.6  
32.2  
32.0  
31.5  
31.2  
30.6  
28.6  
27.3  
20.7  
17.3  
13.5  
12.5  
11.3



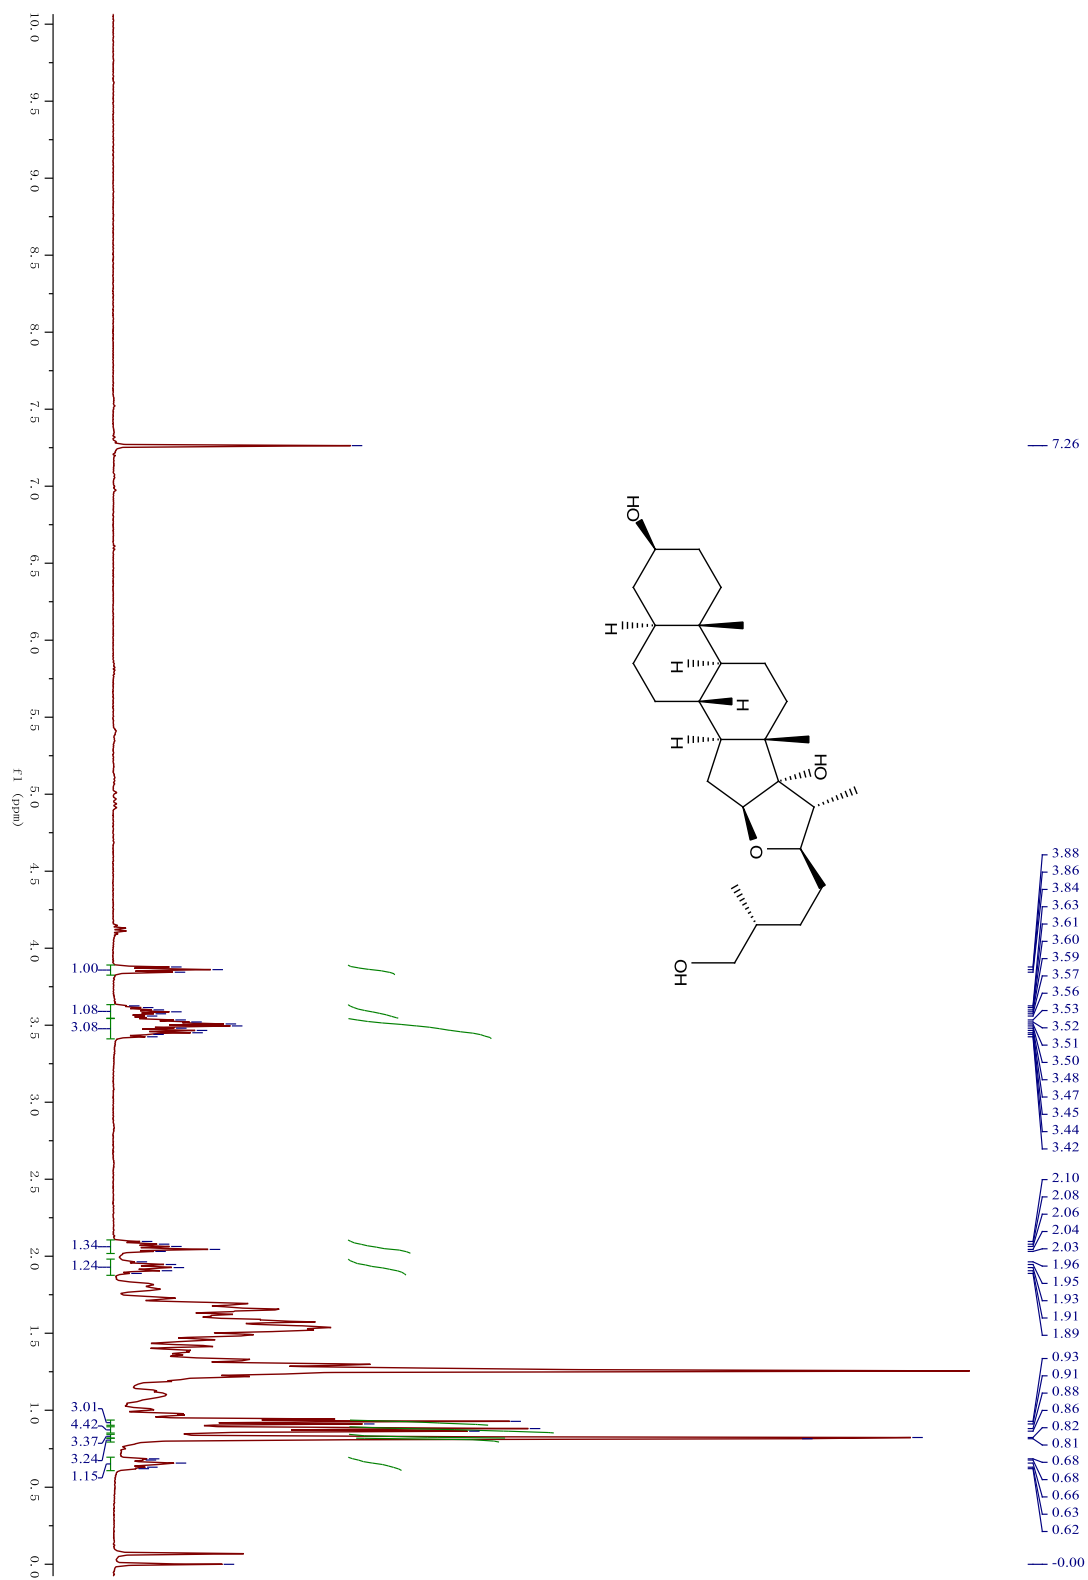

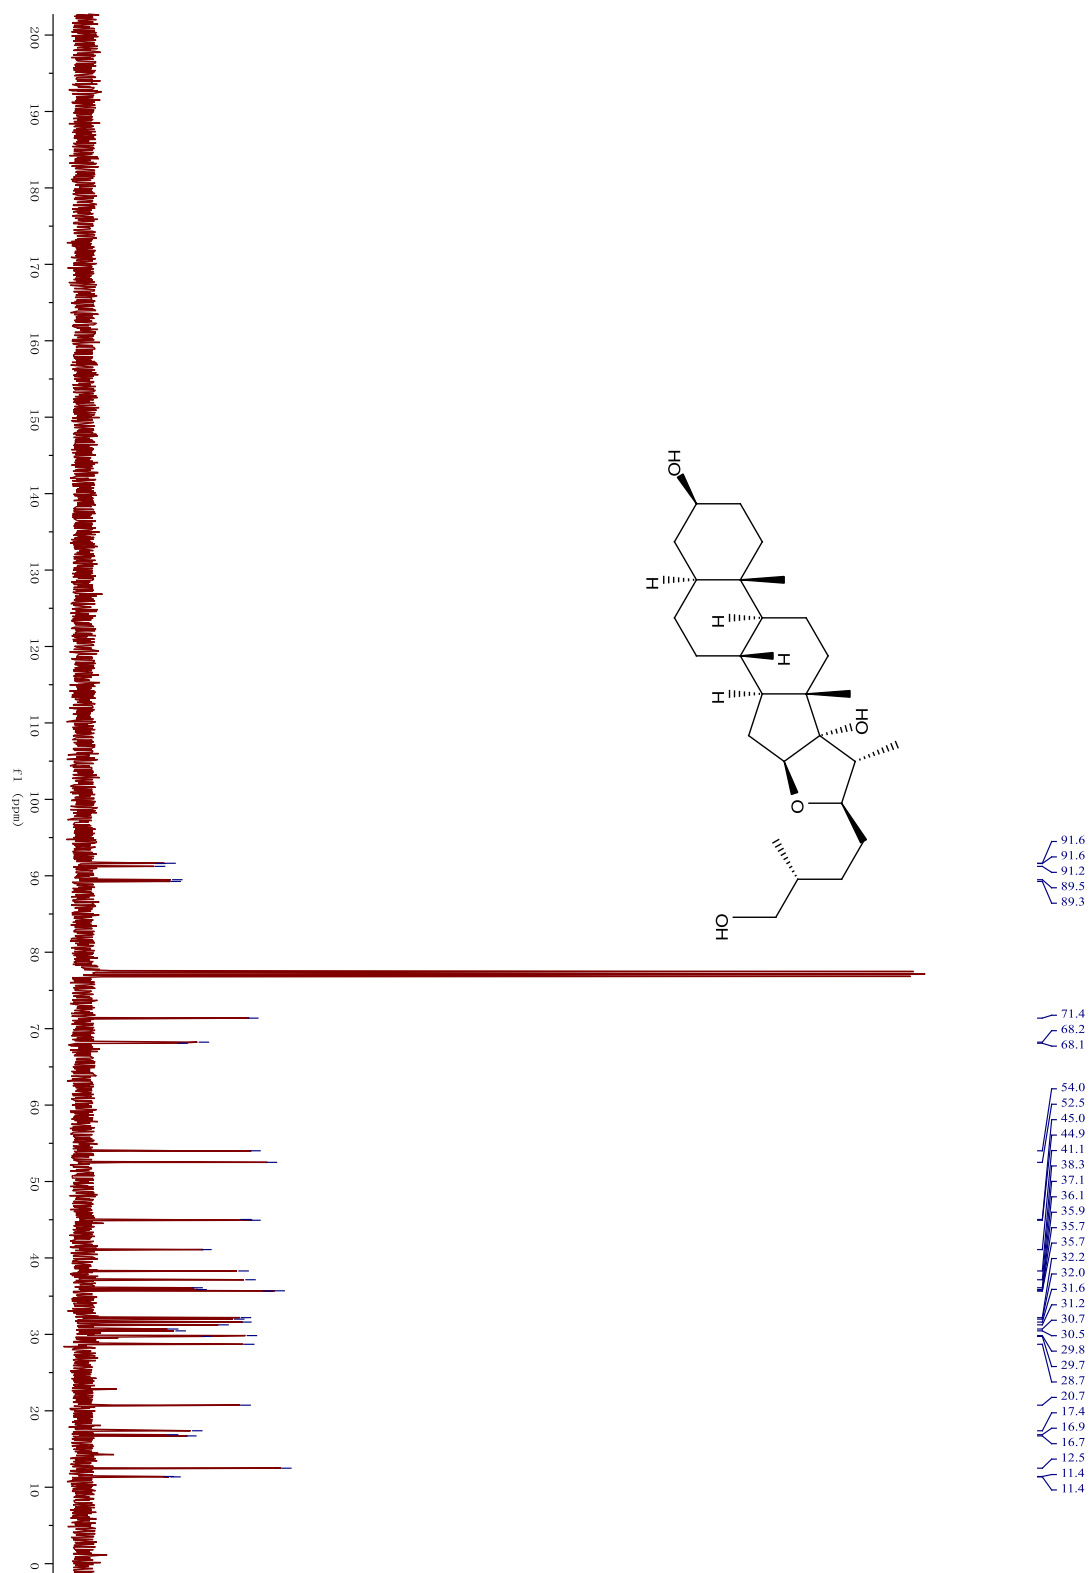

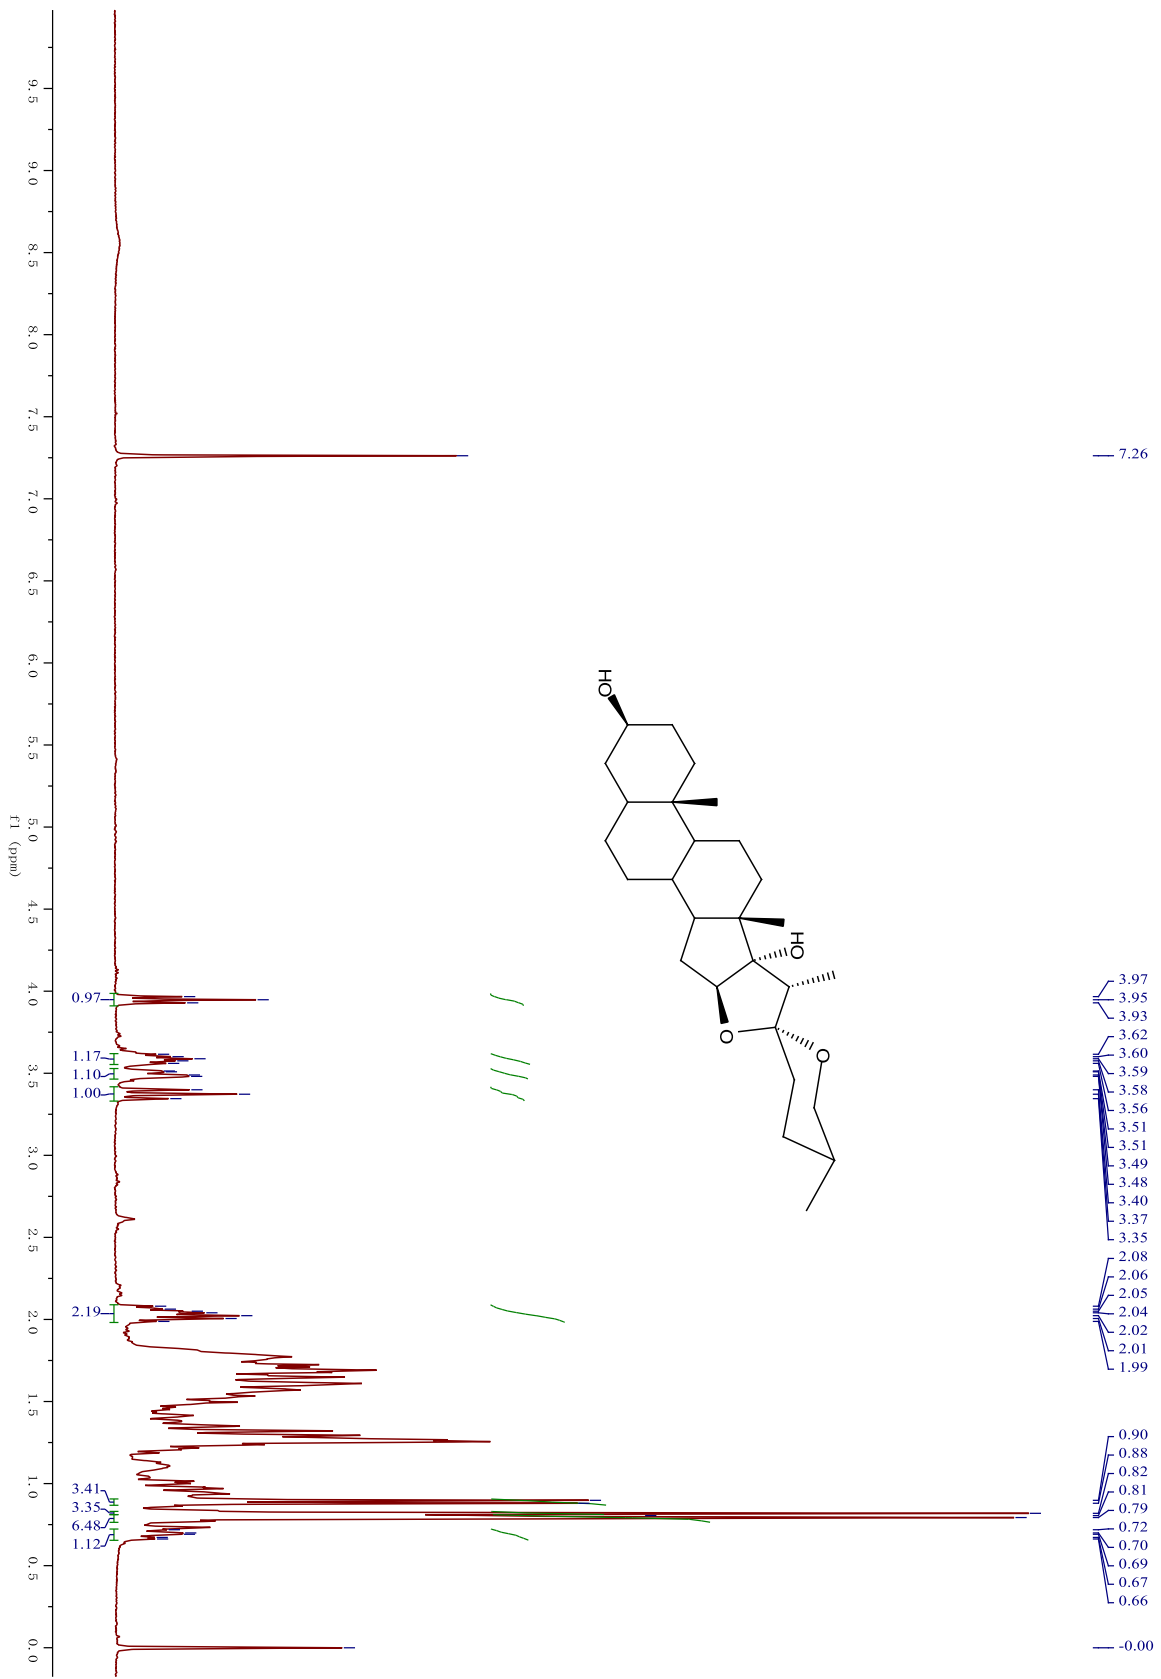

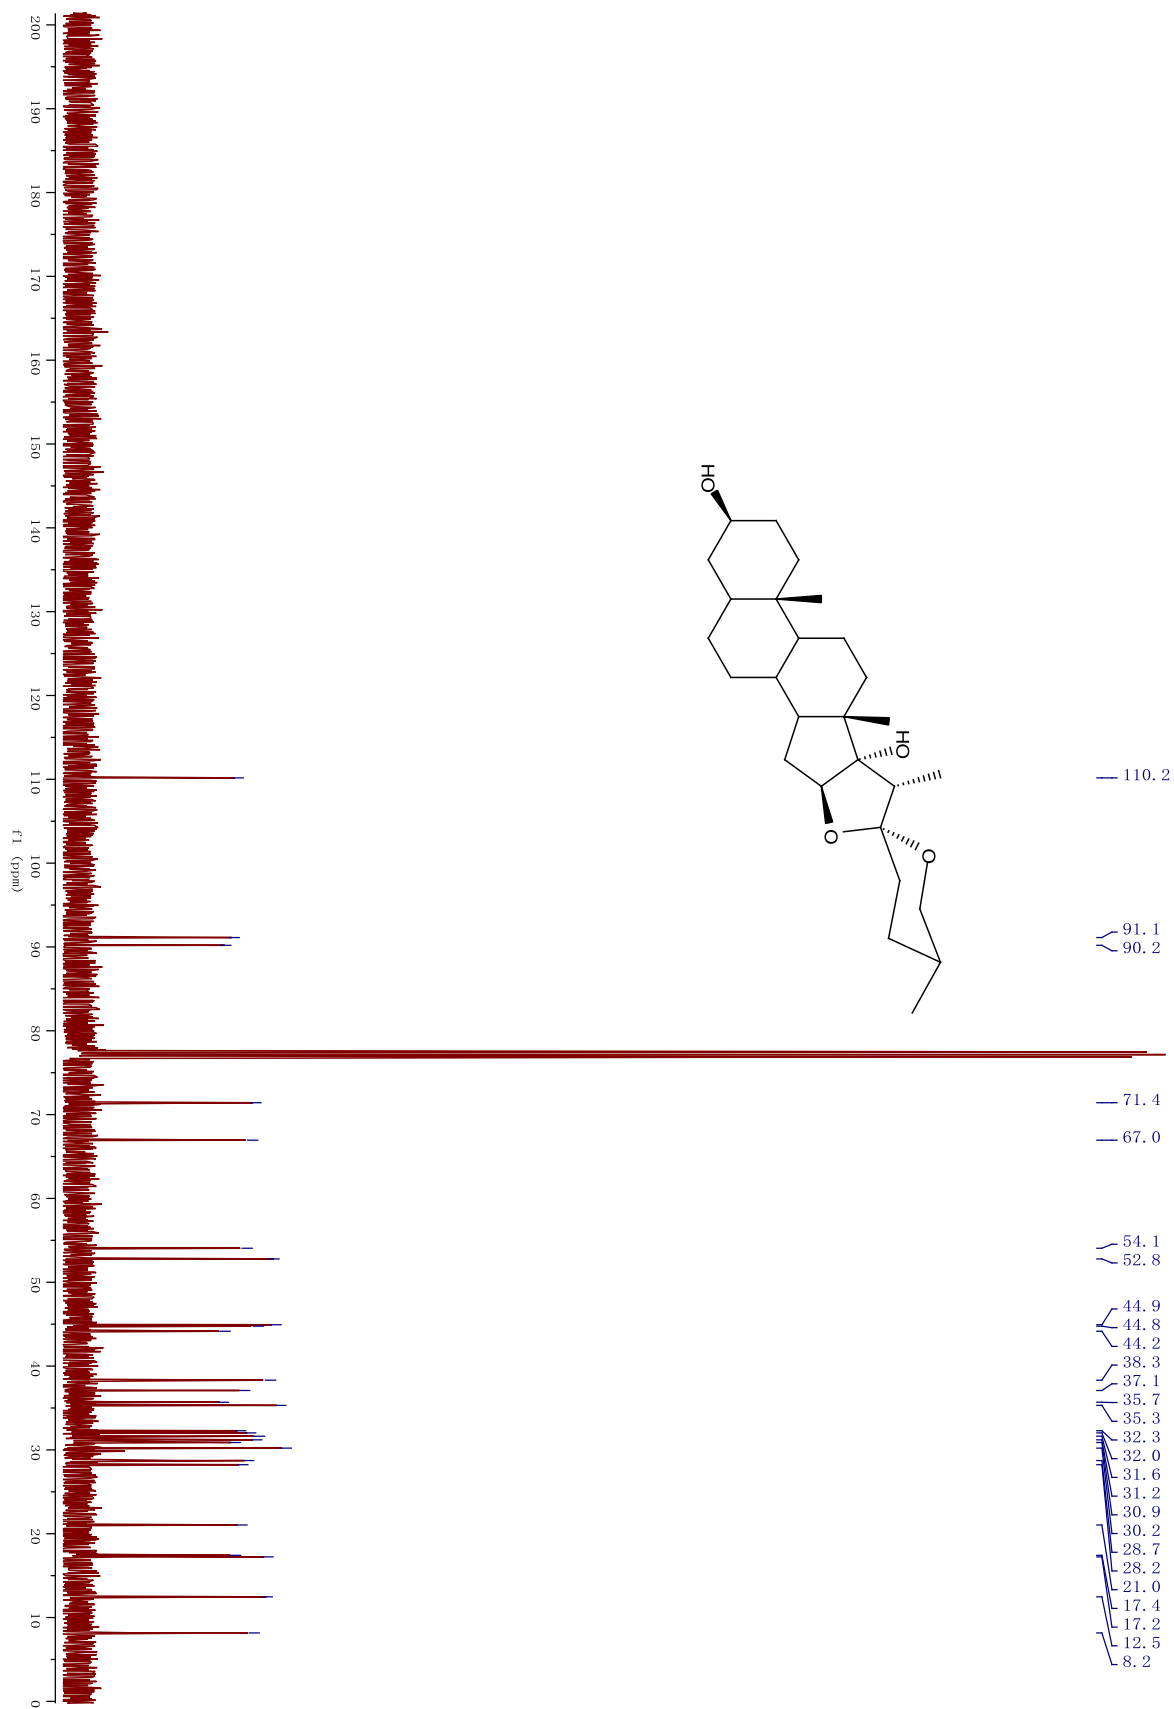

400 MHz  $^1\text{H}$  NMR of compound **18** in pyridine- $d_5$ .

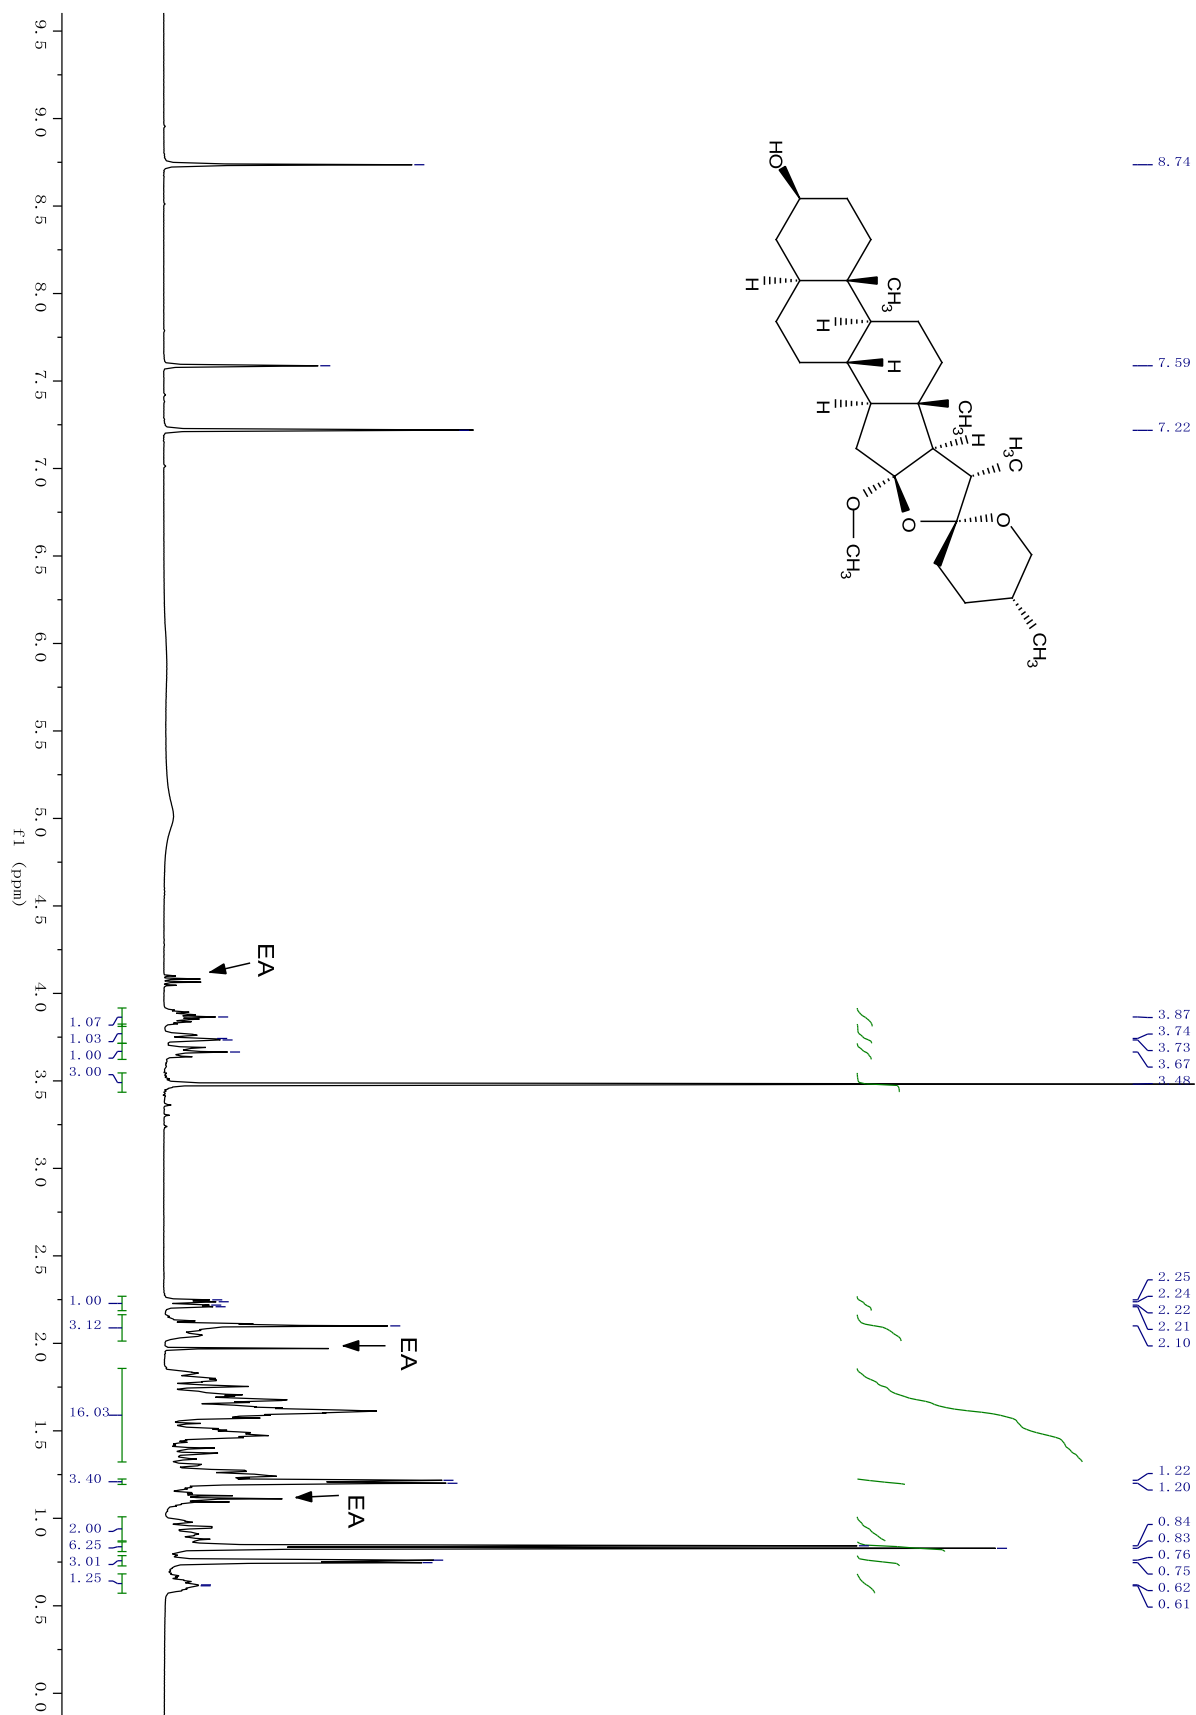

100 MHz  $^{13}\text{C}$  NMR of compound **18** in pyridine- $d_5$

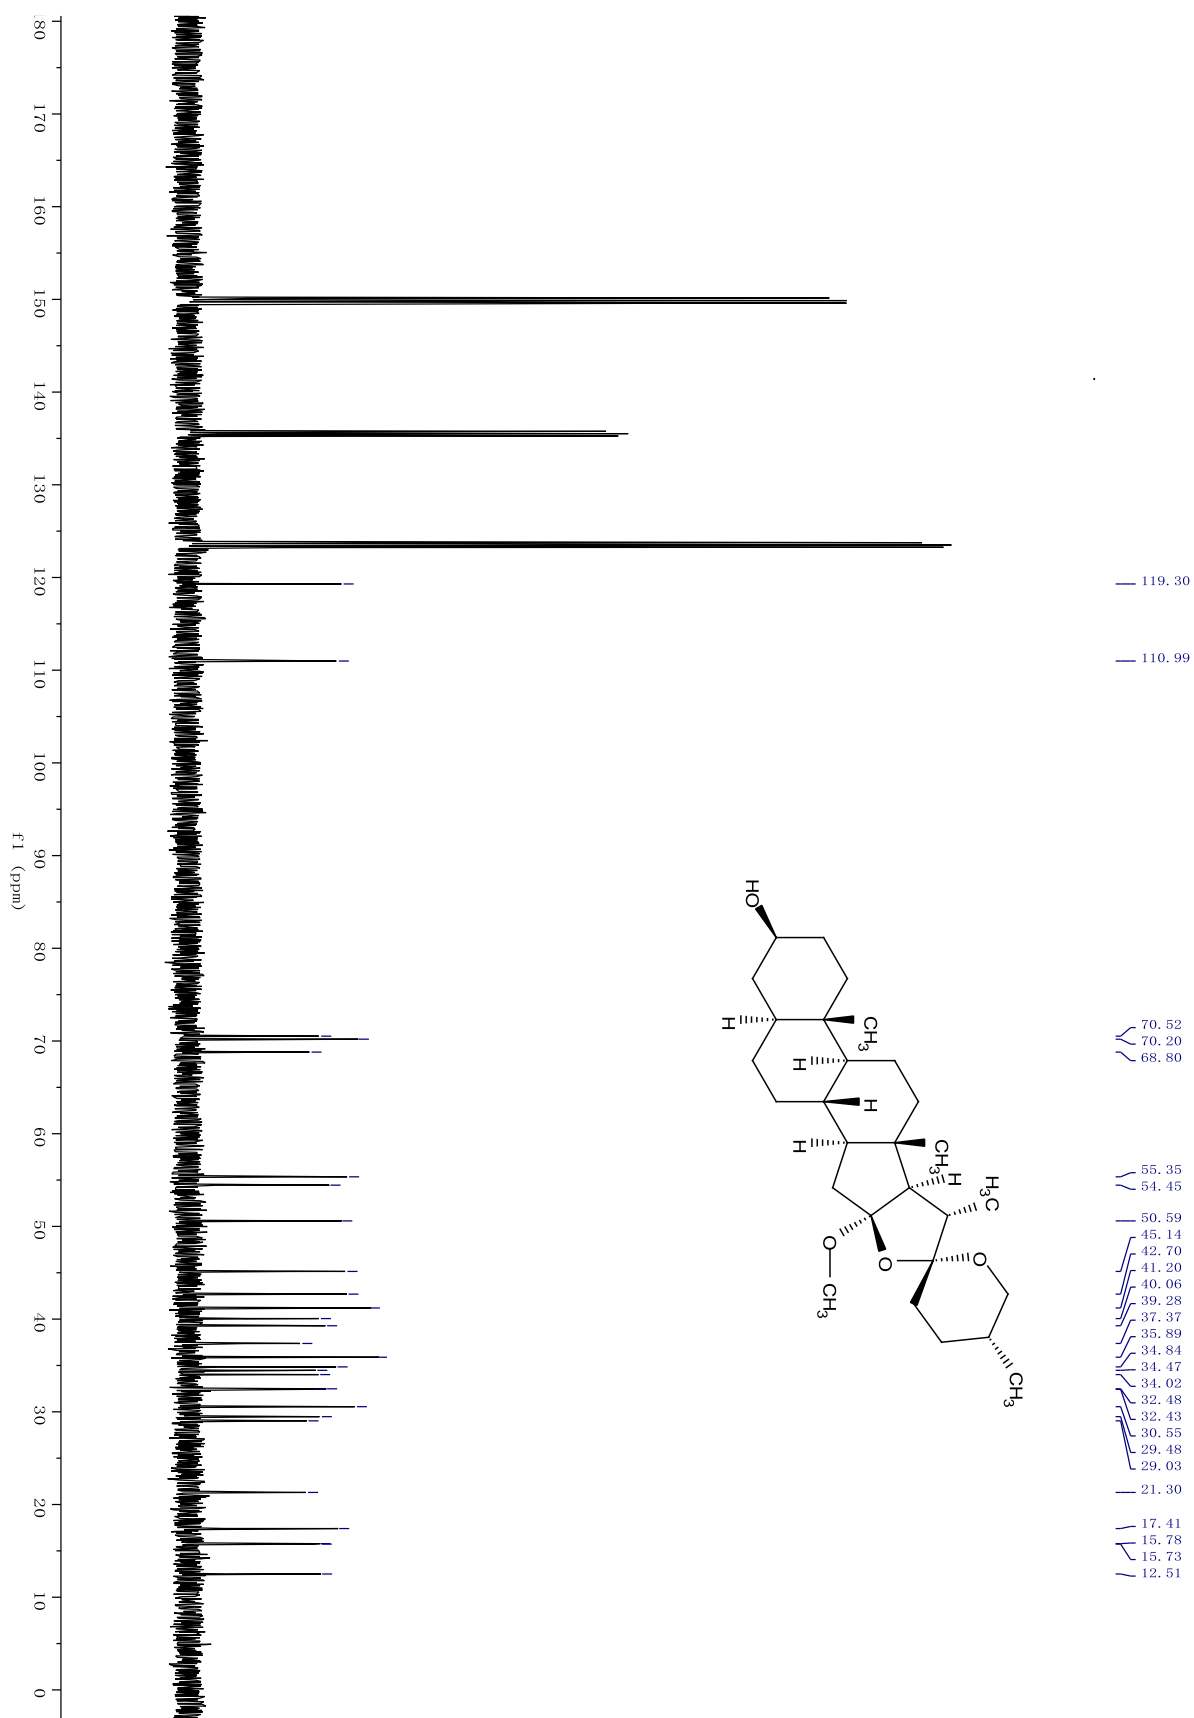

Supplement: c5cc08856a1.pdf [file c5cc08856a1.pdf]
